# Supplementary material for: Remote sensing captures varying temporal patterns of vegetation between human-altered and natural landscapes
Source: PeerJ. 2015 Aug 4;3:e1141. doi: 10.7717/peerj.1141 (PMC4540021; doi:10.7717/peerj.1141)
Supplement: Supplemental Information 1 — For each collecting event, locality, lat/long collecting date, bee total abundance, and bee species richness are listed alongside the pixel value of the EVI and NDVI data available at the date closest to the collecting event, as well as all previous EVI and NDVI values 16 days, 32 days, and 48 days previously (Sheet 1). Additionally, all EVI (Sheet 2) and NDVI (Sheet 3) summary statistics from 2000 to 2014 are presented for each land use type. [file peerj-03-1141-s001.xlsx]

## Sheet: beeData
event	year	m	date	m_written	Land_Type	day	littledays	Locality	site	x	y	total_abun	species_ri	genera_ric	shannon	evenness	RASTERVALU	tEVI	tNDVI	tm16EVI	tm16NDVI	tm32EVI	tm32NDVI	tm48EVI	tm48NDVI	tEVIr	tNDVIr	tm16EVIr	tm16NDVIr	tm32EVIr	tm32NDVIr	tm48EVIr	tm48NDVIr	modtEVI	modtNDVI	modtm16EVI	modtm16NDVI	modtm32EVI	modtm32NDVI	modtm48EVI	modtm48NDVI	modtEVIr	modtNDVIr	modtm16EVIr	modtm16NDVIr	modtm32EVIr	modtm32NDVIr	modtm48EVIr	modtm48NDVIr
2010.6.Balfour_Tower	2010	6	3	c.e.sum	A	154	0.483696	Balfour_Tower	3	-121.629	37.9256	38	2	3	0.636514	0.918296	4016	3732	5082	3930	2429	4750	3174	5557	3885	4016	5040	4383	2712	4992	3478	5678	4186	3.732	5.082	3.93	2.429	4.75	3.174	5.557	3.885	4.016	5.04	4.383	2.712	4.992	3.478	5.678	4.186
2010.6.Brentwood_Sellers	2010	6	3	c.e.sum	A	154	0.483696	Brentwood_Sellers	7	-121.678	37.9128	22	1	2	0	NA	2587	2630	4128	3591	2127	4040	2417	4308	2703	2587	3879	3939	2563	3953	2501	4787	3155	2.63	4.128	3.591	2.127	4.04	2.417	4.308	2.703	2.587	3.879	3.939	2.563	3.953	2.501	4.787	3.155
2010.6.Conc_W	2010	6	18	c.e.sum	A	169	0.565217	Conc_W	13	-121.689	37.9111	42	6	6	1.58109	0.882425	4806	4588	6773	5799	4186	5382	3612	5035	2851	4806	7172	5256	3674	4834	3164	4887	2529	4.588	6.773	5.799	4.186	5.382	3.612	5.035	2.851	4.806	7.172	5.256	3.674	4.834	3.164	4.887	2.529
2010.6.Frog_Hollow	2010	6	3	c.e.sum	A	154	0.483696	Frog_Hollow	18	-121.66	37.9064	50	6	7	0.999753	0.557973	3822	3731	5994	4875	3009	5170	3292	5048	2694	3822	6192	4007	2408	4262	2462	5432	2937	3.731	5.994	4.875	3.009	5.17	3.292	5.048	2.694	3.822	6.192	4.007	2.408	4.262	2.462	5.432	2.937
2010.6.MC_Sellers	2010	6	16	c.e.sum	A	167	0.554348	MC_Sellers	28	-121.662	37.8967	11	1	2	0	NA	5868	5398	6464	6945	5580	6555	4925	5664	3630	5868	6833	7313	5904	6528	4886	6010	4009	5.398	6.464	6.945	5.58	6.555	4.925	5.664	3.63	5.868	6.833	7.313	5.904	6.528	4.886	6.01	4.009
2010.6.Taylor_Lane	2010	6	16	c.e.sum	A	167	0.554348	Taylor_Lane	36	-121.643	37.8894	78	4	5	0.495554	0.357467	3264	3646	5530	5517	3953	4953	3264	5419	3353	3264	5073	5137	3537	4787	3114	5979	3805	3.646	5.53	5.517	3.953	4.953	3.264	5.419	3.353	3.264	5.073	5.137	3.537	4.787	3.114	5.979	3.805
2010.6.BDM_Fred	2010	6	4	c.e.sum	N	155	0.48913	BDM_Fred	4	-121.828	37.9656	88	8	6	1.04395	0.502034	1749	1753	2678	4332	2879	6408	4491	6951	4920	1749	2673	4373	2916	6457	4544	6907	4927	1.753	2.678	4.332	2.879	6.408	4.491	6.951	4.92	1.749	2.673	4.373	2.916	6.457	4.544	6.907	4.927
2010.6.BDM_Somers	2010	6	14	c.e.sum	N	165	0.543478	BDM_Somers_up	5	-121.862	37.9589	136	11	8	1.70464	0.710892	2635	2594	3891	4633	3026	6555	4730	7093	4770	2635	3918	4760	3087	6602	4726	7156	4860	2.594	3.891	4.633	3.026	6.555	4.73	7.093	4.77	2.635	3.918	4.76	3.087	6.602	4.726	7.156	4.86
2010.6.LV_entrance	2010	6	16	c.e.sum	N	167	0.554348	LV_entrance_bridge	21	-121.698	37.8594	167	8	7	1.16773	0.561561	1875	1837	2601	3320	2225	4600	3244	6857	5099	1875	2668	3359	2276	4545	3248	6838	5184	1.837	2.601	3.32	2.225	4.6	3.244	6.857	5.099	1.875	2.668	3.359	2.276	4.545	3.248	6.838	5.184
2010.6.MC_Res	2010	6	18	c.e.sum	N	169	0.565217	MC_Res	27	-121.724	37.8853	102	7	6	1.2789	0.657226	2267	2379	3897	4612	2835	5384	2679	6543	4015	2267	3377	4033	2278	5194	3100	6583	4445	2.379	3.897	4.612	2.835	5.384	2.679	6.543	4.015	2.267	3.377	4.033	2.278	5.194	3.1	6.583	4.445
2010.6.RV	2010	6	4	c.e.sum	N	155	0.48913	RV	34	-121.75	37.8681	57	7	6	1.24496	0.639784	2305	2388	3717	4237	2733	5607	3725	6699	4246	2305	3618	4026	2567	5734	3737	6849	4003	2.388	3.717	4.237	2.733	5.607	3.725	6.699	4.246	2.305	3.618	4.026	2.567	5.734	3.737	6.849	4.003
2010.6.A_F	2010	6	18	c.e.sum	U	169	0.565217	A_F	1	-121.723	37.9214	61	2	3	0.101265	0.146094	3304	3105	4511	4459	3204	4839	3318	5017	3105	3304	4741	4862	3566	5344	3764	5441	3335	3.105	4.511	4.459	3.204	4.839	3.318	5.017	3.105	3.304	4.741	4.862	3.566	5.344	3.764	5.441	3.335
2010.6.BV_F	2010	6	2	c.e.sum	U	153	0.478261	BV_F	8	-121.724	37.9369	58	4	4	0.564258	0.407026	2637	2424	3811	3973	2599	4057	2610	4175	2556	2637	3884	4345	2832	4290	2761	4474	2811	2.424	3.811	3.973	2.599	4.057	2.61	4.175	2.556	2.637	3.884	4.345	2.832	4.29	2.761	4.474	2.811
2010.6.DV_H	2010	6	2	c.e.sum	U	153	0.478261	DV_H	16	-121.783	37.9936	31	7	7	1.4537	0.747054	1909	1690	2926	3156	1845	3347	2092	4461	2674	1909	3175	3803	2022	3727	2341	4559	2585	1.69	2.926	3.156	1.845	3.347	2.092	4.461	2.674	1.909	3.175	3.803	2.022	3.727	2.341	4.559	2.585
2010.6.L_L	2010	6	14	c.e.sum	U	165	0.543478	L_L	20	-121.795	37.9925	15	3	4	0.867563	0.78969	2476	2542	4069	3871	2286	4194	2389	4153	2388	2476	4388	3688	1946	4292	2229	4145	2414	2.542	4.069	3.871	2.286	4.194	2.389	4.153	2.388	2.476	4.388	3.688	1.946	4.292	2.229	4.145	2.414
2010.6.MCP	2010	6	2	c.e.sum	U	153	0.478261	MCP	30	-121.742	37.9353	54	9	6	1.43064	0.651113	2550	3159	4163	3775	2666	4451	3047	5101	3469	2550	3585	4003	2905	4421	2843	4225	2815	3.159	4.163	3.775	2.666	4.451	3.047	5.101	3.469	2.55	3.585	4.003	2.905	4.421	2.843	4.225	2.815
2010.6.MV_RG	2010	6	14	c.e.sum	U	165	0.543478	MV_RG	32	-121.827	37.995	55	4	5	0.462036	0.333289	1823	1824	3466	3168	1825	3583	2194	3642	2088	1823	3502	3133	1766	3595	2203	3643	2104	1.824	3.466	3.168	1.825	3.583	2.194	3.642	2.088	1.823	3.502	3.133	1.766	3.595	2.203	3.643	2.104
2010.8.Balfour_Tower	2010	8	6	d.l.sum	A	218	0.831522	Balfour_Tower	3	-121.629	37.9256	53	4	5	0.329684	0.237817	2577	2475	3617	2926	4191	3127	4287	3732	5082	2577	3737	2271	3566	3394	4540	4016	5040	2.475	3.617	2.926	4.191	3.127	4.287	3.732	5.082	2.577	3.737	2.271	3.566	3.394	4.54	4.016	5.04
2010.8.Brentwood_Sellers	2010	8	3	d.l.sum	A	215	0.815217	Brentwood_Sellers	7	-121.678	37.9128	60	4	5	0.790235	0.570034	3283	4099	5423	4176	6020	3726	5521	2666	4156	3283	4852	4307	6210	3976	5829	2587	3879	4.099	5.423	4.176	6.02	3.726	5.521	2.666	4.156	3.283	4.852	4.307	6.21	3.976	5.829	2.587	3.879
2010.8.Conc_W	2010	8	3	d.l.sum	A	215	0.815217	Conc_W	13	-121.692	37.9039	128	8	8	0.906534	0.435951	3307	3092	4701	2977	4515	3946	5142	3306	5144	3307	4963	3036	4253	4393	5502	3198	5236	3.092	4.701	2.977	4.515	3.946	5.142	3.306	5.144	3.307	4.963	3.036	4.253	4.393	5.502	3.198	5.236
2010.8.Diablo_Lane	2010	8	6	d.l.sum	A	218	0.831522	Diablo_Lane	15	-121.65	37.9389	32	5	5	1.18778	0.738009	3247	2604	3779	2978	4524	3386	4579	2471	3958	3247	4750	3666	5391	4226	5032	2852	4570	2.604	3.779	2.978	4.524	3.386	4.579	2.471	3.958	3.247	4.75	3.666	5.391	4.226	5.032	2.852	4.57
2010.8.Eagle_Lane	2010	8	6	d.l.sum	A	218	0.831522	Eagle_Lane	17	-121.641	37.9544	13	6	7	1.74807	0.975615	3904	3415	4890	2660	4147	2300	3565	2274	3539	3904	5539	2963	4436	1945	3112	2251	3538	3.415	4.89	2.66	4.147	2.3	3.565	2.274	3.539	3.904	5.539	2.963	4.436	1.945	3.112	2.251	3.538
2010.8.Frog_Hollow	2010	8	3	d.l.sum	A	215	0.815217	Frog_Hollow	18	-121.66	37.9067	67	5	5	0.782926	0.486459	3513	3511	5953	4126	5553	3297	5225	3711	6038	3513	6165	4862	5916	3173	4980	3822	6192	3.511	5.953	4.126	5.553	3.297	5.225	3.711	6.038	3.513	6.165	4.862	5.916	3.173	4.98	3.822	6.192
2010.8.MM_HoffmanOrchard	2010	8	3	d.l.sum	A	215	0.815217	MM_HoffmanOrchard	31	-121.668	37.8922	64	3	4	0.655976	0.597095	1395	2256	3403	5008	6137	6157	7058	5894	7200	1395	2307	5754	6836	6535	7165	5833	7041	2.256	3.403	5.008	6.137	6.157	7.058	5.894	7.2	1.395	2.307	5.754	6.836	6.535	7.165	5.833	7.041
2010.8.Taylor_Lane	2010	8	3	d.l.sum	A	215	0.815217	Taylor_Lane	36	-121.643	37.8894	113	4	5	0.356468	0.257137	3427	3673	5680	3711	5569	4935	6823	3646	5530	3427	5673	3633	5554	5353	7183	3264	5073	3.673	5.68	3.711	5.569	4.935	6.823	3.646	5.53	3.427	5.673	3.633	5.554	5.353	7.183	3.264	5.073
2010.8.BDM_Fred	2010	8	5	d.l.sum	N	217	0.826087	BDM_Fred	4	-121.828	37.9656	73	5	4	0.510571	0.317235	1471	1469	2238	1515	2290	2230	5350	1753	2678	1471	2240	1518	2294	2178	5295	1749	2673	1.469	2.238	1.515	2.29	2.23	5.35	1.753	2.678	1.471	2.24	1.518	2.294	2.178	5.295	1.749	2.673
2010.8.BDM_Somers	2010	8	5	d.l.sum	N	217	0.826087	BDM_Somers_up	5	-121.862	37.9589	50	6	6	1.20716	0.673727	2124	2281	3204	2212	3172	2023	3044	2594	3891	2124	3014	2140	3107	2129	3100	2635	3918	2.281	3.204	2.212	3.172	2.023	3.044	2.594	3.891	2.124	3.014	2.14	3.107	2.129	3.1	2.635	3.918
2010.8.CD_MC	2010	8	4	d.l.sum	N	216	0.820652	CD_MC	12	-121.725	37.8736	63	4	5	0.53859	0.38851	1647	1621	2378	1657	2417	1958	3342	1926	2809	1647	2401	1742	2471	1988	3647	2114	2923	1.621	2.378	1.657	2.417	1.958	3.342	1.926	2.809	1.647	2.401	1.742	2.471	1.988	3.647	2.114	2.923
2010.8.LV_entrance	2010	8	4	d.l.sum	N	216	0.820652	LV_entrance_bridge	21	-121.698	37.8594	44	10	9	2.02723	0.880416	1673	1663	2358	1736	2420	2793	4520	1837	2601	1673	2381	1720	2421	2796	4522	1875	2668	1.663	2.358	1.736	2.42	2.793	4.52	1.837	2.601	1.673	2.381	1.72	2.421	2.796	4.522	1.875	2.668
2010.8.MC_Res	2010	8	4	d.l.sum	N	216	0.820652	MC_Res	27	-121.724	37.8853	106	9	9	1.01455	0.461743	1734	1784	3103	2150	3354	2139	3420	2379	3897	1734	2642	1878	2874	1908	3029	2267	3377	1.784	3.103	2.15	3.354	2.139	3.42	2.379	3.897	1.734	2.642	1.878	2.874	1.908	3.029	2.267	3.377
2010.8.RV	2010	8	4	d.l.sum	N	216	0.820652	RV	34	-121.75	37.8681	33	6	5	0.812545	0.45349	2492	2322	3255	2185	3477	2771	4468	2388	3717	2492	3424	2207	3575	2449	3977	2305	3618	2.322	3.255	2.185	3.477	2.771	4.468	2.388	3.717	2.492	3.424	2.207	3.575	2.449	3.977	2.305	3.618
2010.8.A_F	2010	8	2	d.l.sum	U	214	0.809783	A_F	1	-121.723	37.9214	51	5	6	0.891364	0.553836	2965	2890	4446	3375	4552	2955	4491	3105	4511	2965	4648	3863	4829	3154	4775	3304	4741	2.89	4.446	3.375	4.552	2.955	4.491	3.105	4.511	2.965	4.648	3.863	4.829	3.154	4.775	3.304	4.741
2010.8.BV_F	2010	8	2	d.l.sum	U	214	0.809783	BV_F	8	-121.724	37.9369	42	5	5	0.872398	0.542052	2328	2142	3564	2294	3591	2302	3610	2424	3811	2328	3690	2445	3662	2260	3603	2637	3884	2.142	3.564	2.294	3.591	2.302	3.61	2.424	3.811	2.328	3.69	2.445	3.662	2.26	3.603	2.637	3.884
2010.8.DV_H	2010	8	5	d.l.sum	U	217	0.826087	DV_H	16	-121.783	37.9936	60	5	6	0.997305	0.61966	2064	1825	2952	1958	3038	4694	6636	1690	2926	2064	3430	2454	3823	4456	6689	1909	3175	1.825	2.952	1.958	3.038	4.694	6.636	1.69	2.926	2.064	3.43	2.454	3.823	4.456	6.689	1.909	3.175
2010.8.Grant_Ohara	2010	8	5	d.l.sum	U	217	0.826087	Grant_Ohara	19	-121.715	37.9539	41	4	4	1.03991	0.750136	1993	1896	2728	1755	2568	1496	3923	1902	2717	1993	2728	1850	2617	1589	4951	1936	2800	1.896	2.728	1.755	2.568	1.496	3.923	1.902	2.717	1.993	2.728	1.85	2.617	1.589	4.951	1.936	2.8
2010.8.L_L	2010	8	5	d.l.sum	U	217	0.826087	L_L	20	-121.795	37.9925	18	5	6	1.29455	0.804346	2428	2443	3723	2423	3922	2752	3861	2542	4069	2428	3761	2493	4292	2902	3955	2476	4388	2.443	3.723	2.423	3.922	2.752	3.861	2.542	4.069	2.428	3.761	2.493	4.292	2.902	3.955	2.476	4.388
2010.8.MCP	2010	8	2	d.l.sum	U	214	0.809783	MCP	30	-121.742	37.9353	83	7	7	1.19433	0.613764	2462	3130	4275	2955	3831	2775	3816	3159	4163	2462	3657	2747	3678	2358	3224	2550	3585	3.13	4.275	2.955	3.831	2.775	3.816	3.159	4.163	2.462	3.657	2.747	3.678	2.358	3.224	2.55	3.585
2010.8.MV_RG	2010	8	5	d.l.sum	U	217	0.826087	MV_RG	32	-121.827	37.995	12	3	4	0.900256	0.819448	1833	1855	3074	1894	3066	1961	3208	1824	3466	1833	3083	1872	3062	1937	3216	1823	3502	1.855	3.074	1.894	3.066	1.961	3.208	1.824	3.466	1.833	3.083	1.872	3.062	1.937	3.216	1.823	3.502
2010.8.Nottingham	2010	8	6	d.l.sum	U	218	0.831522	Pippo	33	-121.701	37.9269	37	3	4	0.419556	0.381896	2293	2060	3465	2031	3354	1993	3258	2120	3662	2293	3500	2090	3471	2065	3396	2269	3635	2.06	3.465	2.031	3.354	1.993	3.258	2.12	3.662	2.293	3.5	2.09	3.471	2.065	3.396	2.269	3.635
2011.3.Arabian_Lane	2011	3	7	a.e.spr	A	66	0.00543478	Arabian_Lane	2	-121.666	37.9444	11	2	3	0.562335	0.811278	6766	4620	6500	4371	6111	3224	5580	2004	4539	4982	6766	4812	6284	3325	5650	1679	4107	4.62	6.5	4.371	6.111	3.224	5.58	2.004	4.539	4.982	6.766	4.812	6.284	3.325	5.65	1.679	4.107
2011.3.Balfour_Tower	2011	3	7	a.e.spr	A	66	0.00543478	Balfour_Tower	3	-121.629	37.9256	1	1	1	0	NA	5322	3587	5720	5358	6732	5226	7433	3494	6234	3160	5322	5294	6628	5338	7434	3013	5726	3.587	5.72	5.358	6.732	5.226	7.433	3.494	6.234	3.16	5.322	5.294	6.628	5.338	7.434	3.013	5.726
2011.3.Brentwood_Sellers	2011	3	9	a.e.spr	A	68	0.0163043	Brentwood_Sellers	7	-121.678	37.9128	3	0	1	0	0	4940	2817	4850	2179	3945	2119	4440	2115	4642	2783	4940	2270	4177	2159	4581	2533	5422	2.817	4.85	2.179	3.945	2.119	4.44	2.115	4.642	2.783	4.94	2.27	4.177	2.159	4.581	2.533	5.422
2011.3.Byron_Orwood	2011	3	7	a.e.spr	A	66	0.00543478	Byron_Orwood	9	-121.639	37.94	1	1	1	0	NA	4809	3113	5109	3526	5324	3213	5511	3229	5703	2823	4809	4078	5741	4000	6198	4021	6239	3.113	5.109	3.526	5.324	3.213	5.511	3.229	5.703	2.823	4.809	4.078	5.741	4	6.198	4.021	6.239
2011.3.Camino_Diablo	2011	3	9	a.e.spr	A	68	0.0163043	Camino_Diablo	10	-121.642	37.8697	0	0	0	0	0	6067	3532	5528	3600	5508	3118	5116	2557	4901	3868	6067	3834	5722	3247	5311	2823	5339	3.532	5.528	3.6	5.508	3.118	5.116	2.557	4.901	3.868	6.067	3.834	5.722	3.247	5.311	2.823	5.339
2011.3.Frog_Hollow	2011	3	7	a.e.spr	A	66	0.00543478	Frog_Hollow	18	-121.654	37.9047	12	4	4	1.33218	0.960964	6389	3817	5836	3362	5147	2945	5403	2105	4622	4450	6389	3835	5345	3087	5527	2072	4586	3.817	5.836	3.362	5.147	2.945	5.403	2.105	4.622	4.45	6.389	3.835	5.345	3.087	5.527	2.072	4.586
2011.3.MC_W	2011	3	9	a.e.spr	A	68	0.0163043	MC_W	29	-121.695	37.8978	7	1	2	0	NA	6593	3424	5596	3136	5259	3226	5574	2804	5554	4311	6593	3618	5441	2940	5406	2826	5569	3.424	5.596	3.136	5.259	3.226	5.574	2.804	5.554	4.311	6.593	3.618	5.441	2.94	5.406	2.826	5.569
2011.3.MM_HoffmanOrchard	2011	3	9	a.e.spr	A	68	0.0163043	MM_HoffmanOrchard	31	-121.669	37.8892	23	1	2	0	NA	4382	1699	3254	1608	2964	1609	3629	1642	3783	2436	4382	1965	3483	1699	3676	1874	4268	1.699	3.254	1.608	2.964	1.609	3.629	1.642	3.783	2.436	4.382	1.965	3.483	1.699	3.676	1.874	4.268
2011.3.BDM_Fred	2011	3	7	a.e.spr	N	66	0.00543478	BDM_Fred	4	-121.828	37.9656	33	10	6	2.04742	0.889184	6358	3698	6333	3576	6467	3400	5868	2380	5038	3710	6358	3606	6514	3433	5875	2380	5043	3.698	6.333	3.576	6.467	3.4	5.868	2.38	5.038	3.71	6.358	3.606	6.514	3.433	5.875	2.38	5.043
2011.3.BDM_Somers	2011	3	7	a.e.spr	N	66	0.00543478	BDM_Somers	6	-121.862	37.9572	14	5	5	1.5466	0.960956	6785	4125	6773	4049	6402	2965	6067	2180	5190	4134	6785	4061	6425	2954	6073	2190	5190	4.125	6.773	4.049	6.402	2.965	6.067	2.18	5.19	4.134	6.785	4.061	6.425	2.954	6.073	2.19	5.19
2011.3.LV_entrance	2011	3	9	a.e.spr	N	68	0.0163043	LV_entrance	22	-121.699	37.8717	2	1	2	0	NA	6388	3885	6284	4037	6229	3252	5793	3102	5540	3995	6388	4072	6222	3276	5813	3193	5668	3.885	6.284	4.037	6.229	3.252	5.793	3.102	5.54	3.995	6.388	4.072	6.222	3.276	5.813	3.193	5.668
2011.3.LV_MC	2011	3	9	a.e.spr	N	68	0.0163043	LV_MC	23	-121.729	37.8719	59	5	5	1.35798	0.843759	6802	4213	6817	4252	6420	3851	6693	2672	5569	4194	6802	4243	6418	3877	6724	2676	5590	4.213	6.817	4.252	6.42	3.851	6.693	2.672	5.569	4.194	6.802	4.243	6.418	3.877	6.724	2.676	5.59
2011.3.LV_Npond	2011	3	9	a.e.spr	N	68	0.0163043	LV_Npond	24	-121.718	37.8458	14	4	4	1.24245	0.896241	6769	3666	6541	4034	6699	3952	6572	2960	5658	3661	6769	4079	7186	4450	7102	3077	5738	3.666	6.541	4.034	6.699	3.952	6.572	2.96	5.658	3.661	6.769	4.079	7.186	4.45	7.102	3.077	5.738
2011.3.LV_office	2011	3	9	a.e.spr	N	68	0.0163043	LV_office	25	-121.696	37.8536	3	2	3	0.693147	1	7583	5093	7454	4795	6768	4356	7061	3324	6297	5239	7583	4977	6885	4663	7340	3407	6420	5.093	7.454	4.795	6.768	4.356	7.061	3.324	6.297	5.239	7.583	4.977	6.885	4.663	7.34	3.407	6.42
2011.3.A_F	2011	3	9	a.e.spr	U	68	0.0163043	A_F	1	-121.723	37.9214	69	4	4	1.38629	1	5654	3134	5030	2556	4704	2784	4823	2495	4885	3630	5654	2861	5127	2983	5069	2821	5446	3.134	5.03	2.556	4.704	2.784	4.823	2.495	4.885	3.63	5.654	2.861	5.127	2.983	5.069	2.821	5.446
2011.3.BV_F	2011	3	9	a.e.spr	U	68	0.0163043	BV_F	8	-121.724	37.9369	21	7	7	1.79865	0.924324	4085	2058	3880	1847	3899	1809	3719	1787	3763	2157	4085	1951	4113	1906	3914	1921	4011	2.058	3.88	1.847	3.899	1.809	3.719	1.787	3.763	2.157	4.085	1.951	4.113	1.906	3.914	1.921	4.011
2011.3.Castellina	2011	3	7	a.e.spr	U	66	0.00543478	Castellina	11	-121.737	37.9361	33	5	4	1.42644	0.8863	4129	2776	4438	2795	4746	2869	5006	2165	4249	2552	4129	2584	4467	2838	4936	1951	3946	2.776	4.438	2.795	4.746	2.869	5.006	2.165	4.249	2.552	4.129	2.584	4.467	2.838	4.936	1.951	3.946
2011.3.DV_H	2011	3	7	a.e.spr	U	66	0.00543478	DV_H	16	-121.783	37.9936	4	2	3	0.636514	0.918296	5366	2443	4508	2525	4962	2496	4780	2335	4699	2897	5366	3072	5913	2772	5727	2628	5071	2.443	4.508	2.525	4.962	2.496	4.78	2.335	4.699	2.897	5.366	3.072	5.913	2.772	5.727	2.628	5.071
2011.3.MCP	2011	3	9	a.e.spr	U	68	0.0163043	MCP	30	-121.742	37.9353	10	6	5	1.74787	0.975504	4288	2969	4680	3462	5139	3230	5244	3153	5314	2564	4288	2902	4385	2583	4430	3626	5559	2.969	4.68	3.462	5.139	3.23	5.244	3.153	5.314	2.564	4.288	2.902	4.385	2.583	4.43	3.626	5.559
2011.3.MV_RG	2011	3	7	a.e.spr	U	66	0.00543478	MV_RG	32	-121.826	37.995	6	4	3	1.33218	0.960964	4128	2146	4030	1954	4131	1952	4080	1750	3684	2218	4128	2007	4214	1993	4155	1685	3586	2.146	4.03	1.954	4.131	1.952	4.08	1.75	3.684	2.218	4.128	2.007	4.214	1.993	4.155	1.685	3.586
2011.3.Pippo	2011	3	9	a.e.spr	U	68	0.0163043	Pippo	33	-121.701	37.9269	0	0	0	0	0	5184	5290	6949	3386	5729	2877	5315	2388	4753	3018	5184	2002	4201	1979	4145	1620	3429	5.29	6.949	3.386	5.729	2.877	5.315	2.388	4.753	3.018	5.184	2.002	4.201	1.979	4.145	1.62	3.429
2011.3.Tahoe	2011	3	7	a.e.spr	U	66	0.00543478	Tahoe	35	-121.8	37.9894	13	5	4	1.30388	0.810143	4247	2565	4718	2041	4454	2275	4614	2104	4551	2172	4247	1638	3762	2269	4347	1970	4255	2.565	4.718	2.041	4.454	2.275	4.614	2.104	4.551	2.172	4.247	1.638	3.762	2.269	4.347	1.97	4.255
2011.5.Arabian_Lane	2011	5	18	b.l.spr	A	138	0.396739	Arabian_Lane	2	-121.666	37.9444	159	7	6	1.11873	0.574911	1373	1628	2634	1900	3225	2108	3273	4785	6144	1373	2326	1877	3216	1796	2843	5000	6207	1.628	2.634	1.9	3.225	2.108	3.273	4.785	6.144	1.373	2.326	1.877	3.216	1.796	2.843	5	6.207
2011.5.Balfour_Tower	2011	5	18	b.l.spr	A	138	0.396739	Balfour_Tower	3	-121.629	37.9256	36	4	5	1.2395	0.894108	2398	2528	3908	2729	4229	4083	5646	4612	6497	2398	3714	2689	4232	4060	5403	4868	6691	2.528	3.908	2.729	4.229	4.083	5.646	4.612	6.497	2.398	3.714	2.689	4.232	4.06	5.403	4.868	6.691
2011.5.Brentwood_Sellers	2011	5	18	b.l.spr	A	138	0.396739	Brentwood_Sellers	7	-121.678	37.9128	85	7	7	1.20506	0.619279	4534	3957	5625	3195	5109	2844	4593	2695	5670	4534	6055	2774	4938	3041	4644	3705	5620	3.957	5.625	3.195	5.109	2.844	4.593	2.695	5.67	4.534	6.055	2.774	4.938	3.041	4.644	3.705	5.62
2011.5.Byron_Orwood	2011	5	18	b.l.spr	A	138	0.396739	Byron_Orwood	9	-121.639	37.94	105	6	6	0.568224	0.317132	3021	2648	4078	2371	3993	2474	4213	4893	6728	3021	4315	2727	4300	3160	5028	5397	7263	2.648	4.078	2.371	3.993	2.474	4.213	4.893	6.728	3.021	4.315	2.727	4.3	3.16	5.028	5.397	7.263
2011.5.Camino_Diablo	2011	5	23	b.l.spr	A	143	0.423913	Camino_Diablo	10	-121.642	37.8697	79	5	6	1.31834	0.819129	1495	1626	2679	2215	3390	3008	4575	3472	5922	1495	2569	2166	3279	3205	4739	4050	5910	1.626	2.679	2.215	3.39	3.008	4.575	3.472	5.922	1.495	2.569	2.166	3.279	3.205	4.739	4.05	5.91
2011.5.Frog_Hollow	2011	5	23	b.l.spr	A	143	0.423913	Frog_Hollow	18	-121.654	37.9047	148	9	8	1.1803	0.537176	3296	4021	5736	3562	5547	3973	5844	3880	5656	3296	5059	3752	5768	4525	6097	4022	5740	4.021	5.736	3.562	5.547	3.973	5.844	3.88	5.656	3.296	5.059	3.752	5.768	4.525	6.097	4.022	5.74
2011.5.MC_W	2011	5	23	b.l.spr	A	143	0.423913	MC_W	29	-121.695	37.8978	64	4	5	1.19613	0.862825	2222	2961	4731	2724	4266	2433	4345	3286	5187	2222	4078	2098	3603	2563	4593	3295	5042	2.961	4.731	2.724	4.266	2.433	4.345	3.286	5.187	2.222	4.078	2.098	3.603	2.563	4.593	3.295	5.042
2011.5.MM_HoffmanOrchard	2011	5	23	b.l.spr	A	143	0.423913	MM_HoffmanOrchard	31	-121.669	37.8892	45	3	3	1.03972	0.946395	4352	4324	5918	3783	5469	2795	4848	2137	3922	4352	5924	5092	6410	3230	5296	3030	4451	4.324	5.918	3.783	5.469	2.795	4.848	2.137	3.922	4.352	5.924	5.092	6.41	3.23	5.296	3.03	4.451
2011.5.BDM_Fred	2011	5	18	b.l.spr	N	138	0.396739	BDM_Fred	4	-121.828	37.9656	476	10	9	0.674451	0.29291	3245	3203	4763	3861	5935	4909	7578	4574	7225	3245	4809	3904	5981	4964	7628	4618	7181	3.203	4.763	3.861	5.935	4.909	7.578	4.574	7.225	3.245	4.809	3.904	5.981	4.964	7.628	4.618	7.181
2011.5.BDM_Somers	2011	5	23	b.l.spr	N	143	0.423913	BDM_Somers	6	-121.862	37.9572	129	7	6	1.13153	0.581492	2703	2690	4055	4754	7052	5019	7331	5497	7580	2703	4065	4752	7050	5009	7297	5494	7583	2.69	4.055	4.754	7.052	5.019	7.331	5.497	7.58	2.703	4.065	4.752	7.05	5.009	7.297	5.494	7.583
2011.5.LV_entrance	2011	5	23	b.l.spr	N	143	0.423913	LV_entrance	22	-121.699	37.8717	318	8	8	1.44032	0.692648	1662	1627	2569	2813	4328	3693	5748	5048	7564	1662	2626	2895	4442	3765	5854	5235	7796	1.627	2.569	2.813	4.328	3.693	5.748	5.048	7.564	1.662	2.626	2.895	4.442	3.765	5.854	5.235	7.796
2011.5.LV_MC	2011	5	23	b.l.spr	N	143	0.423913	LV_MC	23	-121.729	37.8719	71	6	6	1.23553	0.68956	2561	2558	3811	3765	5492	4839	7240	3063	8522	2561	3817	3747	5467	4883	7314	2880	8574	2.558	3.811	3.765	5.492	4.839	7.24	3.063	8.522	2.561	3.817	3.747	5.467	4.883	7.314	2.88	8.574
2011.5.LV_Npond	2011	5	23	b.l.spr	N	143	0.423913	LV_Npond	24	-121.718	37.8458	662	5	6	0.745097	0.462955	2770	2663	3974	3292	5365	4276	6597	4555	7318	2770	3653	3027	4984	4393	6617	4319	7570	2.663	3.974	3.292	5.365	4.276	6.597	4.555	7.318	2.77	3.653	3.027	4.984	4.393	6.617	4.319	7.57
2011.5.LV_office	2011	5	23	b.l.spr	N	143	0.423913	LV_office	25	-121.696	37.8536	423	8	7	1.45834	0.701313	1760	1750	2585	3381	4799	5505	6956	5718	7634	1760	2611	3561	5034	5580	7041	5704	7575	1.75	2.585	3.381	4.799	5.505	6.956	5.718	7.634	1.76	2.611	3.561	5.034	5.58	7.041	5.704	7.575
2011.5.MC_Res	2011	5	18	b.l.spr	N	138	0.396739	MC_Res	27	-121.709	37.9347	299	7	6	1.13204	0.581751	2217	2336	3981	2506	4291	3089	5250	2718	4778	2217	3966	2821	4450	3425	5473	2744	4966	2.336	3.981	2.506	4.291	3.089	5.25	2.718	4.778	2.217	3.966	2.821	4.45	3.425	5.473	2.744	4.966
2011.5.RV	2011	5	18	b.l.spr	N	138	0.396739	RV	34	-121.75	37.8681	254	7	6	0.871435	0.447829	1879	2080	4171	2994	4961	4127	6097	3911	6867	1879	4336	3032	5342	4077	6107	3873	6961	2.08	4.171	2.994	4.961	4.127	6.097	3.911	6.867	1.879	4.336	3.032	5.342	4.077	6.107	3.873	6.961
2011.5.A_F	2011	5	23	b.l.spr	U	143	0.423913	A_F	1	-121.723	37.9214	117	5	5	0.516364	0.320835	3783	3449	4708	2769	4429	3211	4874	3381	5104	3783	5074	2982	4662	3483	5193	3775	5570	3.449	4.708	2.769	4.429	3.211	4.874	3.381	5.104	3.783	5.074	2.982	4.662	3.483	5.193	3.775	5.57
2011.5.BV_F	2011	5	23	b.l.spr	U	143	0.423913	BV_F	8	-121.724	37.9369	60	7	7	1.40818	0.72366	2954	2754	4084	2540	4432	2496	4351	2615	4376	2954	4271	2848	4851	2605	4418	2759	4510	2.754	4.084	2.54	4.432	2.496	4.351	2.615	4.376	2.954	4.271	2.848	4.851	2.605	4.418	2.759	4.51
2011.5.Castellina	2011	5	23	b.l.spr	U	143	0.423913	Castellina	11	-121.737	37.9361	51	5	5	1.12753	0.700577	1940	2245	3482	2930	4313	3663	4944	3595	5124	1940	3148	2771	4114	3650	4848	3566	5036	2.245	3.482	2.93	4.313	3.663	4.944	3.595	5.124	1.94	3.148	2.771	4.114	3.65	4.848	3.566	5.036
2011.5.DV_H	2011	5	18	b.l.spr	U	138	0.396739	DV_H	16	-121.783	37.9936	69	6	6	1.14834	0.640901	1894	2105	3377	2093	3689	2523	4401	3030	5229	1894	2946	2354	4191	2582	4664	3083	5578	2.105	3.377	2.093	3.689	2.523	4.401	3.03	5.229	1.894	2.946	2.354	4.191	2.582	4.664	3.083	5.578
2011.5.MCP	2011	5	27	b.l.spr	U	147	0.445652	MCP	30	-121.742	37.9353	52	9	7	1.71633	0.781134	2273	2812	4132	2978	4346	3299	4868	3107	4810	2273	3678	2355	3790	3085	5091	3012	4786	2.812	4.132	2.978	4.346	3.299	4.868	3.107	4.81	2.273	3.678	2.355	3.79	3.085	5.091	3.012	4.786
2011.5.MV_RG	2011	5	18	b.l.spr	U	138	0.396739	MV_RG	32	-121.826	37.995	88	7	7	0.936708	0.481373	1850	1931	3502	1954	3319	1914	3335	2283	4376	1850	3444	1943	3295	1895	3296	2306	4447	1.931	3.502	1.954	3.319	1.914	3.335	2.283	4.376	1.85	3.444	1.943	3.295	1.895	3.296	2.306	4.447
2011.5.Pippo	2011	5	18	b.l.spr	U	138	0.396739	Pippo	33	-121.701	37.9269	142	3	4	0.69452	0.63218	2191	2172	3343	1928	3217	2156	3435	4463	6231	2191	3380	2025	3308	2318	3728	3428	5498	2.172	3.343	1.928	3.217	2.156	3.435	4.463	6.231	2.191	3.38	2.025	3.308	2.318	3.728	3.428	5.498
2011.5.Tahoe	2011	5	18	b.l.spr	U	138	0.396739	Tahoe	35	-121.8	37.9894	45	4	5	1.07383	0.774606	2186	2602	4020	2319	4056	2473	4513	2595	4629	2186	3493	1908	3604	2116	4031	2015	4034	2.602	4.02	2.319	4.056	2.473	4.513	2.595	4.629	2.186	3.493	1.908	3.604	2.116	4.031	2.015	4.034
2011.7.Arabian_Lane	2011	7	14	c.e.sum	A	195	0.706522	Arabian_Lane	2	-121.666	37.9444	81	4	4	0.825922	0.595777	3131	3012	4844	2710	5043	2076	3270	1628	2634	3131	5160	2677	5159	1814	2905	1373	2326	3.012	4.844	2.71	5.043	2.076	3.27	1.628	2.634	3.131	5.16	2.677	5.159	1.814	2.905	1.373	2.326
2011.7.Balfour_Tower	2011	7	12	c.e.sum	A	193	0.695652	Balfour_Tower	3	-121.629	37.9256	54	3	4	0.714237	0.650127	2810	3256	5079	2973	4675	2861	4561	2528	3908	2810	4719	3266	4910	3239	5080	2398	3714	3.256	5.079	2.973	4.675	2.861	4.561	2.528	3.908	2.81	4.719	3.266	4.91	3.239	5.08	2.398	3.714
2011.7.Brentwood_Sellers	2011	7	12	c.e.sum	A	193	0.695652	Brentwood_Sellers	7	-121.678	37.9128	191	2	3	0.0708106	0.102158	5309	5045	6904	5239	6449	4842	6591	3957	5625	5309	7232	4892	6108	4793	6380	4534	6055	5.045	6.904	5.239	6.449	4.842	6.591	3.957	5.625	5.309	7.232	4.892	6.108	4.793	6.38	4.534	6.055
2011.7.Byron_Orwood	2011	7	12	c.e.sum	A	193	0.695652	Byron_Orwood	9	-121.639	37.94	58	4	5	1.11637	0.805289	4106	4518	6257	3994	5808	3135	4730	2648	4078	4106	5937	3874	5566	2915	4179	3021	4315	4.518	6.257	3.994	5.808	3.135	4.73	2.648	4.078	4.106	5.937	3.874	5.566	2.915	4.179	3.021	4.315
2011.7.Camino_Diablo	2011	7	14	c.e.sum	A	195	0.706522	Camino_Diablo	10	-121.642	37.8697	86	6	5	0.444582	0.248126	1444	1893	3067	1513	2713	1744	2825	1626	2679	1444	2632	1273	2330	1501	2521	1495	2569	1.893	3.067	1.513	2.713	1.744	2.825	1.626	2.679	1.444	2.632	1.273	2.33	1.501	2.521	1.495	2.569
2011.7.Delta_Holland	2011	7	12	c.e.sum	A	193	0.695652	Delta_Holland	14	-121.618	37.9772	41	18	10	2.63969	0.913271	4057	4228	6290	4446	6657	4099	6045	3899	5934	4057	6226	4026	6380	4069	6085	4265	6102	4.228	6.29	4.446	6.657	4.099	6.045	3.899	5.934	4.057	6.226	4.026	6.38	4.069	6.085	4.265	6.102
2011.7.MC_W	2011	7	14	c.e.sum	A	195	0.706522	MC_W	29	-121.695	37.8978	69	6	6	1.47959	0.825777	2049	2483	4259	3301	5205	3207	4999	2961	4731	2049	3814	2556	4797	2587	4459	2222	4078	2.483	4.259	3.301	5.205	3.207	4.999	2.961	4.731	2.049	3.814	2.556	4.797	2.587	4.459	2.222	4.078
2011.7.MM_HoffmanOrchard	2011	7	14	c.e.sum	A	195	0.706522	MM_HoffmanOrchard	31	-121.669	37.8892	81	2	3	0.562335	0.811278	3606	4111	5843	4112	5791	4794	6744	4324	5918	3606	5684	4108	5695	5118	7092	4352	5924	4.111	5.843	4.112	5.791	4.794	6.744	4.324	5.918	3.606	5.684	4.108	5.695	5.118	7.092	4.352	5.924
2011.7.BDM_Fred	2011	7	12	c.e.sum	N	193	0.695652	BDM_Fred	4	-121.828	37.9656	92	9	9	1.59975	0.728079	1310	1311	2058	1418	2256	2222	3210	3203	4763	1310	2057	1416	2253	2253	3212	3245	4809	1.311	2.058	1.418	2.256	2.222	3.21	3.203	4.763	1.31	2.057	1.416	2.253	2.253	3.212	3.245	4.809
2011.7.BDM_Somers	2011	7	12	c.e.sum	N	193	0.695652	BDM_Somers	6	-121.862	37.9572	76	6	6	1.08725	0.606806	2589	2568	3955	3102	4766	2887	4849	2690	4055	2589	3993	3142	4826	2908	4875	2703	4065	2.568	3.955	3.102	4.766	2.887	4.849	2.69	4.055	2.589	3.993	3.142	4.826	2.908	4.875	2.703	4.065
2011.7.LV_entrance	2011	7	14	c.e.sum	N	195	0.706522	LV_entrance	22	-121.699	37.8717	64	8	7	1.62645	0.782155	1537	1514	2402	1503	2470	1585	2502	1627	2569	1537	2441	1517	2502	1590	2516	1662	2626	1.514	2.402	1.503	2.47	1.585	2.502	1.627	2.569	1.537	2.441	1.517	2.502	1.59	2.516	1.662	2.626
2011.7.LV_MC	2011	7	12	c.e.sum	N	193	0.695652	LV_MC	23	-121.729	37.8719	82	8	7	1.20851	0.581169	1708	1680	2713	1662	2688	1542	2667	2558	3811	1708	2759	1665	2690	1534	2668	2561	3817	1.68	2.713	1.662	2.688	1.542	2.667	2.558	3.811	1.708	2.759	1.665	2.69	1.534	2.668	2.561	3.817
2011.7.LV_Npond	2011	7	14	c.e.sum	N	195	0.706522	LV_Npond	24	-121.718	37.8458	55	8	8	1.56798	0.754037	1930	1826	2887	1797	3004	1991	3274	2663	3974	1930	3015	1806	2983	1920	3100	2770	3653	1.826	2.887	1.797	3.004	1.991	3.274	2.663	3.974	1.93	3.015	1.806	2.983	1.92	3.1	2.77	3.653
2011.7.LV_office	2011	7	14	c.e.sum	N	195	0.706522	LV_office	25	-121.696	37.8536	59	5	3	1.52047	0.94472	1442	1493	2233	1567	2369	1508	2357	1750	2585	1442	2182	1536	2372	1478	2306	1760	2611	1.493	2.233	1.567	2.369	1.508	2.357	1.75	2.585	1.442	2.182	1.536	2.372	1.478	2.306	1.76	2.611
2011.7.MC_Res	2011	7	12	c.e.sum	N	193	0.695652	MC_Res	27	-121.724	37.8853	53	8	6	1.5298	0.735679	2172	2077	3844	1938	3558	1967	3982	2085	3504	2172	3403	1812	3007	1869	3481	1746	3009	2.077	3.844	1.938	3.558	1.967	3.982	2.085	3.504	2.172	3.403	1.812	3.007	1.869	3.481	1.746	3.009
2011.7.RV	2011	7	14	c.e.sum	N	195	0.706522	RV	34	-121.75	37.8681	70	6	5	1.47573	0.82362	1841	1919	3169	1933	3240	2017	3470	2080	4171	1841	3115	2009	3339	2044	3515	1879	4336	1.919	3.169	1.933	3.24	2.017	3.47	2.08	4.171	1.841	3.115	2.009	3.339	2.044	3.515	1.879	4.336
2011.7.A_F	2011	7	12	c.e.sum	U	193	0.695652	A_F	1	-121.723	37.9214	140	2	2	0.0517811	0.0747043	3633	3258	4651	3285	5031	2942	4391	3449	4708	3633	5019	3704	5462	3262	4780	3783	5074	3.258	4.651	3.285	5.031	2.942	4.391	3.449	4.708	3.633	5.019	3.704	5.462	3.262	4.78	3.783	5.074
2011.7.BV_F	2011	7	18	c.e.sum	U	199	0.728261	BV_F	8	-121.724	37.9369	69	7	7	1.0014	0.514617	2728	2432	3865	2397	3973	2401	3749	2754	4084	2728	4071	2496	4058	2437	3812	2954	4271	2.432	3.865	2.397	3.973	2.401	3.749	2.754	4.084	2.728	4.071	2.496	4.058	2.437	3.812	2.954	4.271
2011.7.Castellina	2011	7	14	c.e.sum	U	195	0.706522	Castellina	11	-121.737	37.9361	162	3	3	0.260156	0.236804	2684	2878	4462	2488	3728	2480	3667	2245	3482	2684	4327	2253	3414	2242	3359	1940	3148	2.878	4.462	2.488	3.728	2.48	3.667	2.245	3.482	2.684	4.327	2.253	3.414	2.242	3.359	1.94	3.148
2011.7.DV_H	2011	7	12	c.e.sum	U	193	0.695652	DV_H	16	-121.783	37.9936	97	5	6	0.997908	0.620035	2164	1897	3166	1842	3137	1981	3159	2105	3377	2164	3696	1882	3581	2285	3618	1894	2946	1.897	3.166	1.842	3.137	1.981	3.159	2.105	3.377	2.164	3.696	1.882	3.581	2.285	3.618	1.894	2.946
2011.7.MCP	2011	7	14	c.e.sum	U	195	0.706522	MCP	30	-121.742	37.9353	61	7	7	1.43382	0.736838	2660	2985	4333	3196	4402	2625	3929	2812	4132	2660	4168	2542	3780	2089	3422	2273	3678	2.985	4.333	3.196	4.402	2.625	3.929	2.812	4.132	2.66	4.168	2.542	3.78	2.089	3.422	2.273	3.678
2011.7.MV_RG	2011	7	12	c.e.sum	U	193	0.695652	MV_RG	32	-121.826	37.995	86	6	7	0.590783	0.329722	1911	1989	3283	2110	3910	1987	3336	1931	3502	1911	3210	2105	4057	2001	3350	1850	3444	1.989	3.283	2.11	3.91	1.987	3.336	1.931	3.502	1.911	3.21	2.105	4.057	2.001	3.35	1.85	3.444
2011.7.Pippo	2011	7	14	c.e.sum	U	195	0.706522	Pippo	33	-121.701	37.9269	84	6	7	0.586585	0.32738	2158	2213	3590	2211	3800	2118	3463	2172	3343	2158	3581	2232	3656	2077	3534	2191	3380	2.213	3.59	2.211	3.8	2.118	3.463	2.172	3.343	2.158	3.581	2.232	3.656	2.077	3.534	2.191	3.38
2011.7.Tahoe	2011	7	12	c.e.sum	U	193	0.695652	Tahoe	35	-121.8	37.9894	88	2	3	0.387212	0.558629	1994	2480	4003	2525	4008	2368	3960	2602	4020	1994	3504	2255	3615	1933	3416	2186	3493	2.48	4.003	2.525	4.008	2.368	3.96	2.602	4.02	1.994	3.504	2.255	3.615	1.933	3.416	2.186	3.493
2011.9.Arabian_Lane	2011	8	29	d.l.sum	A	241	0.956522	Arabian_Lane	2	-121.666	37.9444	226	9	9	0.761038	0.346363	2463	2313	3769	1576	2934	3165	4616	3012	4844	2463	3918	1526	2938	3651	5145	3131	5160	2.313	3.769	1.576	2.934	3.165	4.616	3.012	4.844	2.463	3.918	1.526	2.938	3.651	5.145	3.131	5.16
2011.9.Balfour_Tower	2011	8	29	d.l.sum	A	241	0.956522	Balfour_Tower	3	-121.629	37.9256	62	5	6	0.821024	0.510131	3343	2511	3981	2615	3952	3145	4731	3256	5079	3343	4989	3276	4643	3229	5138	2810	4719	2.511	3.981	2.615	3.952	3.145	4.731	3.256	5.079	3.343	4.989	3.276	4.643	3.229	5.138	2.81	4.719
2011.9.Brentwood_Sellers	2011	8	29	d.l.sum	A	241	0.956522	Brentwood_Sellers	7	-121.678	37.9128	196	7	8	0.439453	0.225834	1464	1461	2644	2411	3898	4062	5659	5045	6904	1464	2835	2387	3641	3663	5402	5309	7232	1.461	2.644	2.411	3.898	4.062	5.659	5.045	6.904	1.464	2.835	2.387	3.641	3.663	5.402	5.309	7.232
2011.9.Camino_Diablo	2011	8	29	d.l.sum	A	241	0.956522	Camino_Diablo	10	-121.642	37.8697	117	9	9	0.765588	0.348434	3329	2813	4301	3247	4692	2827	4710	1893	3067	3329	4932	3660	5314	3293	5360	1444	2632	2.813	4.301	3.247	4.692	2.827	4.71	1.893	3.067	3.329	4.932	3.66	5.314	3.293	5.36	1.444	2.632
2011.9.Delta_Holland	2011	8	29	d.l.sum	A	241	0.956522	Delta_Holland	14	-121.618	37.9772	62	12	8	2.23319	0.898702	2873	2791	5402	4056	6315	4249	6171	4228	6290	2873	5457	4069	6218	4165	5910	4057	6226	2.791	5.402	4.056	6.315	4.249	6.171	4.228	6.29	2.873	5.457	4.069	6.218	4.165	5.91	4.057	6.226
2011.9.BDM_Fred	2011	8	29	d.l.sum	N	241	0.956522	BDM_Fred	4	-121.828	37.9656	65	10	10	1.98075	0.860227	1232	1238	1923	1284	2024	1325	2074	1311	2058	1232	1918	1283	2019	1322	2068	1310	2057	1.238	1.923	1.284	2.024	1.325	2.074	1.311	2.058	1.232	1.918	1.283	2.019	1.322	2.068	1.31	2.057
2011.9.BDM_Somers	2011	8	29	d.l.sum	N	241	0.956522	BDM_Somers	6	-121.862	37.9572	51	8	8	1.32992	0.639557	2420	2381	3833	2365	3836	2953	4436	2568	3955	2420	3900	2399	3880	2980	4483	2589	3993	2.381	3.833	2.365	3.836	2.953	4.436	2.568	3.955	2.42	3.9	2.399	3.88	2.98	4.483	2.589	3.993
2011.9.LV_MC	2011	8	29	d.l.sum	N	241	0.956522	LV_MC	23	-121.729	37.8719	97	6	5	0.849294	0.474	1807	1790	2756	1667	2654	1939	3005	1680	2713	1807	2785	1668	2666	1971	3049	1708	2759	1.79	2.756	1.667	2.654	1.939	3.005	1.68	2.713	1.807	2.785	1.668	2.666	1.971	3.049	1.708	2.759
2011.9.MC_Res	2011	8	29	d.l.sum	N	241	0.956522	MC_Res	27	-121.724	37.8853	61	6	6	1.63278	0.911274	1739	1942	3453	1870	3415	1854	3527	2077	3844	1739	3013	1679	3141	1646	3045	2172	3403	1.942	3.453	1.87	3.415	1.854	3.527	2.077	3.844	1.739	3.013	1.679	3.141	1.646	3.045	2.172	3.403
2011.9.RV	2011	8	29	d.l.sum	N	241	0.956522	RV	34	-121.75	37.8681	60	10	9	1.55156	0.673835	1752	1767	2865	1870	2961	1804	3037	1919	3169	1752	2914	1839	2950	1782	3061	1841	3115	1.767	2.865	1.87	2.961	1.804	3.037	1.919	3.169	1.752	2.914	1.839	2.95	1.782	3.061	1.841	3.115
2011.9.BV_F	2011	8	29	d.l.sum	U	241	0.956522	BV_F	8	-121.724	37.9369	132	10	8	1.60252	0.695968	2295	2195	4054	2460	3907	2274	3797	2432	3865	2295	4426	2625	4056	2178	3794	2728	4071	2.195	4.054	2.46	3.907	2.274	3.797	2.432	3.865	2.295	4.426	2.625	4.056	2.178	3.794	2.728	4.071
2011.9.DV_H	2011	8	29	d.l.sum	U	241	0.956522	DV_H	16	-121.783	37.9936	36	4	4	1.23668	0.89208	2468	1880	3163	1813	3205	1788	2948	1897	3166	2468	4063	2099	4001	2315	3575	2164	3696	1.88	3.163	1.813	3.205	1.788	2.948	1.897	3.166	2.468	4.063	2.099	4.001	2.315	3.575	2.164	3.696
2011.9.MCP	2011	8	29	d.l.sum	U	241	0.956522	MCP	30	-121.742	37.9353	86	7	7	1.54935	0.796208	2219	2718	4086	2844	4136	2730	4101	2985	4333	2219	3499	2151	3558	2216	3666	2660	4168	2.718	4.086	2.844	4.136	2.73	4.101	2.985	4.333	2.219	3.499	2.151	3.558	2.216	3.666	2.66	4.168
2011.9.MV_RG	2011	8	29	d.l.sum	U	241	0.956522	MV_RG	32	-121.826	37.995	29	4	4	0.857174	0.61832	1870	1864	3242	1781	3136	1846	3216	1989	3283	1870	3258	1781	3125	1832	3183	1911	3210	1.864	3.242	1.781	3.136	1.846	3.216	1.989	3.283	1.87	3.258	1.781	3.125	1.832	3.183	1.911	3.21
2011.9.Tahoe	2011	8	29	d.l.sum	U	241	0.956522	Tahoe	35	-121.8	37.9894	23	3	4	0.758937	0.690814	1783	2159	4070	2188	3836	2287	3901	2480	4003	1783	3588	1854	3378	2015	3499	1994	3504	2.159	4.07	2.188	3.836	2.287	3.901	2.48	4.003	1.783	3.588	1.854	3.378	2.015	3.499	1.994	3.504
2011.9.Byron_Orwood	2011	9	1	d.l.sum	A	244	0.972826	Byron_Orwood	9	-121.639	37.94	78	9	7	1.9601	0.892078	2906	2903	4320	3337	5111	4201	5987	4518	6257	2906	4536	3672	5512	4359	5946	4106	5937	2.903	4.32	3.337	5.111	4.201	5.987	4.518	6.257	2.906	4.536	3.672	5.512	4.359	5.946	4.106	5.937
2011.9.MC_W	2011	9	1	d.l.sum	A	244	0.972826	MC_W	29	-121.695	37.8978	115	6	6	0.521519	0.291066	2211	2205	3920	2112	3642	2263	3703	2483	4259	2211	3888	2042	3468	2263	3702	2049	3814	2.205	3.92	2.112	3.642	2.263	3.703	2.483	4.259	2.211	3.888	2.042	3.468	2.263	3.702	2.049	3.814
2011.9.MM_HoffmanOrchard	2011	9	1	d.l.sum	A	244	0.972826	MM_HoffmanOrchard	31	-121.669	37.8892	252	7	7	0.98407	0.505712	2767	2029	3357	3465	5234	3916	5842	4111	5843	2767	4115	3232	4676	3902	6050	3606	5684	2.029	3.357	3.465	5.234	3.916	5.842	4.111	5.843	2.767	4.115	3.232	4.676	3.902	6.05	3.606	5.684
2011.9.LV_entrance	2011	9	1	d.l.sum	N	244	0.972826	LV_entrance	22	-121.699	37.8717	58	12	9	1.93233	0.777628	1526	1497	2264	1496	2314	1483	2325	1514	2402	1526	2299	1529	2360	1510	2361	1537	2441	1.497	2.264	1.496	2.314	1.483	2.325	1.514	2.402	1.526	2.299	1.529	2.36	1.51	2.361	1.537	2.441
2011.9.LV_Npond	2011	9	1	d.l.sum	N	244	0.972826	LV_Npond	24	-121.718	37.8458	86	7	6	0.828749	0.425893	1887	1687	2543	1718	2618	1693	2681	1826	2887	1887	2780	1956	2894	1747	2598	1930	3015	1.687	2.543	1.718	2.618	1.693	2.681	1.826	2.887	1.887	2.78	1.956	2.894	1.747	2.598	1.93	3.015
2011.9.LV_office	2011	9	1	d.l.sum	N	244	0.972826	LV_office	25	-121.696	37.8536	137	12	7	1.3896	0.559216	1553	1567	2221	1481	2165	1475	2170	1493	2233	1553	2202	1463	2155	1408	2095	1442	2182	1.567	2.221	1.481	2.165	1.475	2.17	1.493	2.233	1.553	2.202	1.463	2.155	1.408	2.095	1.442	2.182
2011.9.A_F	2011	9	1	d.l.sum	U	244	0.972826	A_F	1	-121.723	37.9214	176	8	7	1.21581	0.584681	2785	2630	4355	2621	4244	3091	4749	3258	4651	2785	4544	2676	4418	3496	5230	3633	5019	2.63	4.355	2.621	4.244	3.091	4.749	3.258	4.651	2.785	4.544	2.676	4.418	3.496	5.23	3.633	5.019
2011.9.Castellina	2011	9	1	d.l.sum	U	244	0.972826	Castellina	11	-121.737	37.9361	117	8	7	0.936663	0.45044	2557	2672	3883	2176	3320	2966	4004	2878	4462	2557	3654	1871	2914	2831	3747	2684	4327	2.672	3.883	2.176	3.32	2.966	4.004	2.878	4.462	2.557	3.654	1.871	2.914	2.831	3.747	2.684	4.327
2011.9.Pippo	2011	9	1	d.l.sum	U	244	0.972826	Pippo	33	-121.701	37.9269	198	6	7	0.718096	0.400777	1906	1912	3387	2095	3594	1995	3254	2213	3590	1906	3384	2133	3517	1928	3290	2158	3581	1.912	3.387	2.095	3.594	1.995	3.254	2.213	3.59	1.906	3.384	2.133	3.517	1.928	3.29	2.158	3.581
2012.4.Arabian_Lane	2012	4	5	a.e.spr	A	96	0.168478	Arabian_Lane	2	-121.666	37.9444	210	4	4	0.623848	0.450011	5866	5375	7258	4115	6904	4552	6633	3500	5837	5866	7672	4250	7056	5085	7042	3685	6030	5.375	7.258	4.115	6.904	4.552	6.633	3.5	5.837	5.866	7.672	4.25	7.056	5.085	7.042	3.685	6.03
2012.4.Balfour_Tower	2012	4	5	a.e.spr	A	96	0.168478	Balfour_Tower	3	-121.629	37.9256	14	3	3	0.867563	0.78969	4252	4294	6246	3195	5890	3559	5213	3080	5408	4252	6195	3327	6126	3989	5458	3693	6061	4.294	6.246	3.195	5.89	3.559	5.213	3.08	5.408	4.252	6.195	3.327	6.126	3.989	5.458	3.693	6.061
2012.4.Brentwood_Sellers	2012	4	5	a.e.spr	A	96	0.168478	Brentwood_Sellers	7	-121.678	37.9128	34	3	4	0.916465	0.834202	2857	2434	4491	2024	4653	2171	4215	1681	3497	2857	5343	2535	5505	2374	4765	2071	4199	2.434	4.491	2.024	4.653	2.171	4.215	1.681	3.497	2.857	5.343	2.535	5.505	2.374	4.765	2.071	4.199
2012.4.Byron_Orwood	2012	4	5	a.e.spr	A	96	0.168478	Byron_Orwood	9	-121.639	37.94	37	5	6	1.52296	0.946265	6168	5066	6834	4357	6512	4308	6220	3748	5977	6168	7527	5781	8109	4675	6494	3744	5863	5.066	6.834	4.357	6.512	4.308	6.22	3.748	5.977	6.168	7.527	5.781	8.109	4.675	6.494	3.744	5.863
2012.4.Camino_Diablo	2012	4	7	a.e.spr	A	98	0.179348	Camino_Diablo	10	-121.642	37.8697	133	7	6	1.24199	0.638255	3356	3073	5273	3534	6105	2932	4911	2627	4596	3356	5723	3730	6353	3396	5412	3018	5167	3.073	5.273	3.534	6.105	2.932	4.911	2.627	4.596	3.356	5.723	3.73	6.353	3.396	5.412	3.018	5.167
2012.4.Delta_Holland	2012	4	5	a.e.spr	A	96	0.168478	Delta_Holland	14	-121.618	37.9772	523	12	8	1.4624	0.588513	4448	4767	7501	3537	7009	3521	5893	2868	5607	4448	7205	3950	7264	2443	4977	2688	5223	4.767	7.501	3.537	7.009	3.521	5.893	2.868	5.607	4.448	7.205	3.95	7.264	2.443	4.977	2.688	5.223
2012.4.MC_Hoff	2012	4	7	a.e.spr	A	98	0.179348	MC_Hoff	26	-121.669	37.8974	27	5	6	1.42413	0.884862	2252	2181	4092	1702	3667	1605	3065	1414	2765	2252	4403	1544	3637	1632	3053	1459	2832	2.181	4.092	1.702	3.667	1.605	3.065	1.414	2.765	2.252	4.403	1.544	3.637	1.632	3.053	1.459	2.832
2012.4.MM_HoffmanOrchard	2012	4	7	a.e.spr	A	98	0.179348	MM_HoffmanOrchard	31	-121.669	37.8892	133	3	3	0.80827	0.735719	2985	2488	4447	1300	3099	1223	2547	1254	2718	2985	4998	1478	3583	1400	2870	1419	3044	2.488	4.447	1.3	3.099	1.223	2.547	1.254	2.718	2.985	4.998	1.478	3.583	1.4	2.87	1.419	3.044
2012.4.BDM_Fred	2012	4	7	a.e.spr	N	98	0.179348	BDM_Fred	4	-121.828	37.9656	155	8	8	1.52078	0.731342	3510	3462	5815	2506	4654	1947	4657	1723	3394	3510	5870	2500	4645	1964	4726	1725	3380	3.462	5.815	2.506	4.654	1.947	4.657	1.723	3.394	3.51	5.87	2.5	4.645	1.964	4.726	1.725	3.38
2012.4.BDM_Somers	2012	4	5	a.e.spr	N	96	0.168478	BDM_Somers	6	-121.862	37.9572	49	9	7	1.56011	0.710039	4241	4239	6868	2980	6190	2166	4477	1656	3697	4241	6879	3019	6252	2196	4529	1674	3730	4.239	6.868	2.98	6.19	2.166	4.477	1.656	3.697	4.241	6.879	3.019	6.252	2.196	4.529	1.674	3.73
2012.4.LV_entrance	2012	4	5	a.e.spr	N	96	0.168478	LV_entrance	22	-121.699	37.8717	161	6	4	1.03387	0.577013	2891	2872	5216	3348	5983	2658	4552	2375	4367	2891	5252	3450	6182	2674	4538	2438	4488	2.872	5.216	3.348	5.983	2.658	4.552	2.375	4.367	2.891	5.252	3.45	6.182	2.674	4.538	2.438	4.488
2012.4.LV_MC	2012	4	7	a.e.spr	N	98	0.179348	LV_MC	23	-121.729	37.8719	127	6	5	0.964695	0.538406	3958	3971	6807	4640	7557	3566	6290	3327	5766	3958	6797	4634	7554	3566	6300	3360	5790	3.971	6.807	4.64	7.557	3.566	6.29	3.327	5.766	3.958	6.797	4.634	7.554	3.566	6.3	3.36	5.79
2012.4.LV_Npond	2012	4	5	a.e.spr	N	96	0.168478	LV_Npond	24	-121.718	37.8458	116	9	7	1.31985	0.600688	3556	3981	6649	3703	6678	2871	5485	2761	5099	3556	6532	3420	6520	2770	5548	2750	5311	3.981	6.649	3.703	6.678	2.871	5.485	2.761	5.099	3.556	6.532	3.42	6.52	2.77	5.548	2.75	5.311
2012.4.LV_office	2012	4	5	a.e.spr	N	96	0.168478	LV_office	25	-121.696	37.8536	335	8	7	0.59529	0.286274	3768	3904	6298	4256	7035	3248	5614	3006	5071	3768	6170	4416	7217	3244	5772	3000	5084	3.904	6.298	4.256	7.035	3.248	5.614	3.006	5.071	3.768	6.17	4.416	7.217	3.244	5.772	3	5.084
2012.4.MC_Res	2012	4	7	a.e.spr	N	98	0.179348	MC_Res	27	-121.724	37.8853	265	8	8	1.23378	0.593322	4180	3723	6613	3422	6986	3096	5792	2605	5119	4180	6855	3818	7159	3602	6242	3485	5981	3.723	6.613	3.422	6.986	3.096	5.792	2.605	5.119	4.18	6.855	3.818	7.159	3.602	6.242	3.485	5.981
2012.4.RV	2012	4	5	a.e.spr	N	96	0.168478	RV	34	-121.75	37.8681	125	11	7	1.79681	0.749329	4394	4551	6992	3955	7118	3420	5930	2378	4872	4394	6887	3652	7072	3489	6056	2170	4765	4.551	6.992	3.955	7.118	3.42	5.93	2.378	4.872	4.394	6.887	3.652	7.072	3.489	6.056	2.17	4.765
2012.4.A_F	2012	4	5	a.e.spr	U	96	0.168478	A_F	1	-121.723	37.9214	57	2	3	0.369333	0.532835	3304	3053	4904	3572	5273	2731	4455	2581	4639	3304	5265	3794	5346	2992	4819	2875	5154	3.053	4.904	3.572	5.273	2.731	4.455	2.581	4.639	3.304	5.265	3.794	5.346	2.992	4.819	2.875	5.154
2012.4.BV_F	2012	4	5	a.e.spr	U	96	0.168478	BV_F	8	-121.724	37.9369	118	4	4	0.783391	0.565097	2900	2600	4587	2823	4564	2119	3812	2062	3958	2900	4981	2947	4535	2204	3969	2254	4241	2.6	4.587	2.823	4.564	2.119	3.812	2.062	3.958	2.9	4.981	2.947	4.535	2.204	3.969	2.254	4.241
2012.4.Castellina	2012	4	7	a.e.spr	U	98	0.179348	Castellina	11	-121.737	37.9361	354	5	5	0.260362	0.161772	2867	2999	4861	2578	4862	2509	4054	2385	4209	2867	4651	2389	4644	2279	3799	2162	3943	2.999	4.861	2.578	4.862	2.509	4.054	2.385	4.209	2.867	4.651	2.389	4.644	2.279	3.799	2.162	3.943
2012.4.DV_H	2012	4	5	a.e.spr	U	96	0.168478	DV_H	16	-121.783	37.9936	102	8	7	0.93182	0.448111	2435	2234	4188	2195	4474	2058	3903	1825	3902	2435	4550	2321	4983	2304	4482	2064	4487	2.234	4.188	2.195	4.474	2.058	3.903	1.825	3.902	2.435	4.55	2.321	4.983	2.304	4.482	2.064	4.487
2012.4.MCP	2012	4	5	a.e.spr	U	96	0.168478	MCP	30	-121.742	37.9353	104	6	6	1.13756	0.634885	2653	2991	4673	3145	5404	2868	4709	2901	4606	2653	4324	2888	5147	2978	4549	2480	4227	2.991	4.673	3.145	5.404	2.868	4.709	2.901	4.606	2.653	4.324	2.888	5.147	2.978	4.549	2.48	4.227
2012.4.MV_RG	2012	4	5	a.e.spr	U	96	0.168478	MV_RG	32	-121.826	37.995	138	5	5	0.838728	0.521131	2350	2311	3942	2004	4419	1696	3321	1552	3303	2350	3930	2016	4469	1683	3289	1561	3314	2.311	3.942	2.004	4.419	1.696	3.321	1.552	3.303	2.35	3.93	2.016	4.469	1.683	3.289	1.561	3.314
2012.4.Pippo	2012	4	5	a.e.spr	U	96	0.168478	Pippo	33	-121.701	37.9269	87	7	8	1.15598	0.594056	2503	3398	5385	3227	5088	2474	4471	2610	4718	2503	4400	2671	4120	2117	3946	2048	4029	3.398	5.385	3.227	5.088	2.474	4.471	2.61	4.718	2.503	4.4	2.671	4.12	2.117	3.946	2.048	4.029
2012.4.Tahoe	2012	4	5	a.e.spr	U	96	0.168478	Tahoe	35	-121.8	37.9894	85	12	7	1.98193	0.797586	2893	2784	4836	2406	4558	2104	3921	1963	3995	2893	4818	2206	4189	1795	3417	1746	3756	2.784	4.836	2.406	4.558	2.104	3.921	1.963	3.995	2.893	4.818	2.206	4.189	1.795	3.417	1.746	3.756
2012.5.Arabian_Lane	2012	5	15	b.l.spr	A	136	0.38587	Arabian_Lane	2	-121.666	37.9444	315	6	6	1.39939	0.781015	1500	1611	3053	2077	3702	5375	7258	4115	6904	1500	2983	2183	3889	5866	7672	4250	7056	1.611	3.053	2.077	3.702	5.375	7.258	4.115	6.904	1.5	2.983	2.183	3.889	5.866	7.672	4.25	7.056
2012.5.Balfour_Tower	2012	5	15	b.l.spr	A	136	0.38587	Balfour_Tower	3	-121.629	37.9256	15	3	4	1.03972	0.946395	3001	2966	4560	3780	5741	4294	6246	3195	5890	3001	4565	3942	5775	4252	6195	3327	6126	2.966	4.56	3.78	5.741	4.294	6.246	3.195	5.89	3.001	4.565	3.942	5.775	4.252	6.195	3.327	6.126
2012.5.Brentwood_Sellers	2012	5	17	b.l.spr	A	138	0.396739	Brentwood_Sellers	7	-121.678	37.9128	104	5	6	1.15853	0.719835	4297	3805	5886	2983	4926	2434	4491	2024	4653	4297	6648	3138	4805	2857	5343	2535	5505	3.805	5.886	2.983	4.926	2.434	4.491	2.024	4.653	4.297	6.648	3.138	4.805	2.857	5.343	2.535	5.505
2012.5.Byron_Orwood	2012	5	15	b.l.spr	A	136	0.38587	Byron_Orwood	9	-121.639	37.94	31	9	7	1.98505	0.903437	3168	3812	5441	4280	6197	5066	6834	4357	6512	3168	4575	4257	5848	6168	7527	5781	8109	3.812	5.441	4.28	6.197	5.066	6.834	4.357	6.512	3.168	4.575	4.257	5.848	6.168	7.527	5.781	8.109
2012.5.Camino_Diablo	2012	5	17	b.l.spr	A	138	0.396739	Camino_Diablo	10	-121.642	37.8697	78	4	4	0.4709	0.339683	3257	2982	4282	3169	5214	3073	5273	3534	6105	3257	4648	3566	5827	3356	5723	3730	6353	2.982	4.282	3.169	5.214	3.073	5.273	3.534	6.105	3.257	4.648	3.566	5.827	3.356	5.723	3.73	6.353
2012.5.Delta_Holland	2012	5	15	b.l.spr	A	136	0.38587	Delta_Holland	14	-121.618	37.9772	37	9	7	1.8681	0.850208	4723	4093	6170	4674	7007	4767	7501	3537	7009	4723	6337	4766	6969	4448	7205	3950	7264	4.093	6.17	4.674	7.007	4.767	7.501	3.537	7.009	4.723	6.337	4.766	6.969	4.448	7.205	3.95	7.264
2012.5.MC_Hoff	2012	5	17	b.l.spr	A	138	0.396739	MC_Hoff	26	-121.669	37.8974	24	6	6	1.69574	0.946412	2435	3195	4898	2403	4105	2181	4092	1702	3667	2435	4026	2100	3614	2252	4403	1544	3637	3.195	4.898	2.403	4.105	2.181	4.092	1.702	3.667	2.435	4.026	2.1	3.614	2.252	4.403	1.544	3.637
2012.5.MM_HoffmanOrchard	2012	5	17	b.l.spr	A	138	0.396739	MM_HoffmanOrchard	31	-121.669	37.8892	62	3	3	1.05492	0.96023	5387	5088	6728	3824	5770	2488	4447	1300	3099	5387	7052	4582	6624	2985	4998	1478	3583	5.088	6.728	3.824	5.77	2.488	4.447	1.3	3.099	5.387	7.052	4.582	6.624	2.985	4.998	1.478	3.583
2012.5.BDM_Fred	2012	5	15	b.l.spr	N	136	0.38587	BDM_Fred	4	-121.828	37.9656	244	10	8	1.49144	0.647723	2573	2559	4057	3753	6272	3462	5815	2506	4654	2573	4045	3823	6358	3510	5870	2500	4645	2.559	4.057	3.753	6.272	3.462	5.815	2.506	4.654	2.573	4.045	3.823	6.358	3.51	5.87	2.5	4.645
2012.5.BDM_Somers	2012	5	15	b.l.spr	N	136	0.38587	BDM_Somers	6	-121.862	37.9572	351	13	10	1.16157	0.452864	4347	4352	6153	4923	7218	4239	6868	2980	6190	4347	6133	4922	7227	4241	6879	3019	6252	4.352	6.153	4.923	7.218	4.239	6.868	2.98	6.19	4.347	6.133	4.922	7.227	4.241	6.879	3.019	6.252
2012.5.LV_entrance	2012	5	17	b.l.spr	N	138	0.396739	LV_entrance	22	-121.699	37.8717	304	7	6	0.589448	0.302916	2237	2185	3536	3092	4934	2872	5216	3348	5983	2237	3611	3163	5054	2891	5252	3450	6182	2.185	3.536	3.092	4.934	2.872	5.216	3.348	5.983	2.237	3.611	3.163	5.054	2.891	5.252	3.45	6.182
2012.5.LV_MC	2012	5	15	b.l.spr	N	136	0.38587	LV_MC	23	-121.729	37.8719	75	7	7	1.4761	0.758567	3287	3241	4801	3731	5967	3971	6807	4640	7557	3287	4854	3740	5942	3958	6797	4634	7554	3.241	4.801	3.731	5.967	3.971	6.807	4.64	7.557	3.287	4.854	3.74	5.942	3.958	6.797	4.634	7.554
2012.5.LV_Npond	2012	5	17	b.l.spr	N	138	0.396739	LV_Npond	24	-121.718	37.8458	303	9	8	0.975247	0.443854	3174	2902	4578	3538	6105	3981	6649	3703	6678	3174	4699	3749	6053	3556	6532	3420	6520	2.902	4.578	3.538	6.105	3.981	6.649	3.703	6.678	3.174	4.699	3.749	6.053	3.556	6.532	3.42	6.52
2012.5.LV_office	2012	5	17	b.l.spr	N	138	0.396739	LV_office	25	-121.696	37.8536	239	6	6	0.657877	0.367168	2270	2290	3518	3676	5498	3904	6298	4256	7035	2270	3468	3932	5715	3768	6170	4416	7217	2.29	3.518	3.676	5.498	3.904	6.298	4.256	7.035	2.27	3.468	3.932	5.715	3.768	6.17	4.416	7.217
2012.5.MC_Res	2012	5	15	b.l.spr	N	136	0.38587	MC_Res	27	-121.724	37.8853	130	12	9	1.70944	0.687931	2645	2624	4639	3566	6097	3723	6613	3422	6986	2645	4726	3383	5662	4180	6855	3818	7159	2.624	4.639	3.566	6.097	3.723	6.613	3.422	6.986	2.645	4.726	3.383	5.662	4.18	6.855	3.818	7.159
2012.5.RV	2012	5	17	b.l.spr	N	138	0.396739	RV	34	-121.75	37.8681	98	7	5	1.37576	0.707003	3510	3601	5477	4386	6449	4551	6992	3955	7118	3510	5479	4256	6381	4394	6887	3652	7072	3.601	5.477	4.386	6.449	4.551	6.992	3.955	7.118	3.51	5.479	4.256	6.381	4.394	6.887	3.652	7.072
2012.5.A_F	2012	5	17	b.l.spr	U	138	0.396739	A_F	1	-121.723	37.9214	198	4	4	0.617185	0.445205	3021	2836	4140	2682	4221	3053	4904	3572	5273	3021	4397	2759	4356	3304	5265	3794	5346	2.836	4.14	2.682	4.221	3.053	4.904	3.572	5.273	3.021	4.397	2.759	4.356	3.304	5.265	3.794	5.346
2012.5.BV_F	2012	5	17	b.l.spr	U	138	0.396739	BV_F	8	-121.724	37.9369	99	4	4	0.826405	0.596125	3006	2671	4274	2416	4166	2600	4587	2823	4564	3006	4641	2543	4433	2900	4981	2947	4535	2.671	4.274	2.416	4.166	2.6	4.587	2.823	4.564	3.006	4.641	2.543	4.433	2.9	4.981	2.947	4.535
2012.5.Castellina	2012	5	17	b.l.spr	U	138	0.396739	Castellina	11	-121.737	37.9361	240	3	4	0.237819	0.216472	2561	2715	4437	3025	4386	2999	4861	2578	4862	2561	4340	2910	4192	2867	4651	2389	4644	2.715	4.437	3.025	4.386	2.999	4.861	2.578	4.862	2.561	4.34	2.91	4.192	2.867	4.651	2.389	4.644
2012.5.DV_H	2012	5	15	b.l.spr	U	136	0.38587	DV_H	16	-121.783	37.9936	86	6	6	1.45337	0.811139	2130	1919	3351	2190	3893	2234	4188	2195	4474	2130	3669	2515	4274	2435	4550	2321	4983	1.919	3.351	2.19	3.893	2.234	4.188	2.195	4.474	2.13	3.669	2.515	4.274	2.435	4.55	2.321	4.983
2012.5.MCP	2012	5	15	b.l.spr	U	136	0.38587	MCP	30	-121.742	37.9353	62	8	8	1.62894	0.783356	2587	2762	3890	2955	4530	2991	4673	3145	5404	2587	3605	2517	3987	2653	4324	2888	5147	2.762	3.89	2.955	4.53	2.991	4.673	3.145	5.404	2.587	3.605	2.517	3.987	2.653	4.324	2.888	5.147
2012.5.MV_RG	2012	5	15	b.l.spr	U	136	0.38587	MV_RG	32	-121.826	37.995	109	5	4	0.496852	0.308711	1834	1851	3168	2147	3702	2311	3942	2004	4419	1834	3142	2140	3691	2350	3930	2016	4469	1.851	3.168	2.147	3.702	2.311	3.942	2.004	4.419	1.834	3.142	2.14	3.691	2.35	3.93	2.016	4.469
2012.5.Pippo	2012	5	17	b.l.spr	U	138	0.396739	Pippo	33	-121.701	37.9269	137	1	2	0	NA	2259	2041	3324	2634	4501	3398	5385	3227	5088	2259	3628	2233	3749	2503	4400	2671	4120	2.041	3.324	2.634	4.501	3.398	5.385	3.227	5.088	2.259	3.628	2.233	3.749	2.503	4.4	2.671	4.12
2012.5.Tahoe	2012	5	15	b.l.spr	U	136	0.38587	Tahoe	35	-121.8	37.9894	32	3	4	0.990835	0.901897	2053	2231	4238	2396	4215	2784	4836	2406	4558	2053	4200	2108	3762	2893	4818	2206	4189	2.231	4.238	2.396	4.215	2.784	4.836	2.406	4.558	2.053	4.2	2.108	3.762	2.893	4.818	2.206	4.189
2012.7.Arabian_Lane	2012	7	18	c.e.sum	A	200	0.733696	Arabian_Lane	2	-121.666	37.9444	385	5	5	0.687834	0.427375	2669	2736	4671	2224	3619	2076	3302	1880	3495	2669	4859	1949	3389	1951	3175	1809	3515	2.736	4.671	2.224	3.619	2.076	3.302	1.88	3.495	2.669	4.859	1.949	3.389	1.951	3.175	1.809	3.515
2012.7.Balfour_Tower	2012	7	18	c.e.sum	A	200	0.733696	Balfour_Tower	3	-121.629	37.9256	27	4	5	1.12693	0.812907	3853	3900	5366	3389	4757	3424	5177	3180	4728	3853	5321	3247	4905	2843	4687	2519	4145	3.9	5.366	3.389	4.757	3.424	5.177	3.18	4.728	3.853	5.321	3.247	4.905	2.843	4.687	2.519	4.145
2012.7.Brentwood_Sellers	2012	7	16	c.e.sum	A	198	0.722826	Brentwood_Sellers	7	-121.678	37.9128	73	3	4	0.270641	0.246348	2711	3199	4486	3376	4793	4523	6274	4037	5988	2711	3861	2231	3318	4727	6739	4132	6034	3.199	4.486	3.376	4.793	4.523	6.274	4.037	5.988	2.711	3.861	2.231	3.318	4.727	6.739	4.132	6.034
2012.7.Byron_Orwood	2012	7	18	c.e.sum	A	200	0.733696	Byron_Orwood	9	-121.639	37.94	211	6	6	0.740902	0.413505	4010	3141	4613	1977	3316	4103	5659	3006	4768	4010	5294	2496	3911	3739	5427	2748	4432	3.141	4.613	1.977	3.316	4.103	5.659	3.006	4.768	4.01	5.294	2.496	3.911	3.739	5.427	2.748	4.432
2012.7.Camino_Diablo	2012	7	16	c.e.sum	A	198	0.722826	Camino_Diablo	10	-121.642	37.8697	56	5	6	0.789277	0.490406	2402	2286	3637	2976	4180	3206	4114	2784	4237	2402	3789	3513	4681	3848	4655	3119	4662	2.286	3.637	2.976	4.18	3.206	4.114	2.784	4.237	2.402	3.789	3.513	4.681	3.848	4.655	3.119	4.662
2012.7.Delta_Holland	2012	7	18	c.e.sum	A	200	0.733696	Delta_Holland	14	-121.618	37.9772	84	13	12	2.32642	0.907004	3808	4231	6360	4447	6395	3604	5409	3572	5506	3808	5883	4121	5970	4181	5700	3345	5349	4.231	6.36	4.447	6.395	3.604	5.409	3.572	5.506	3.808	5.883	4.121	5.97	4.181	5.7	3.345	5.349
2012.7.MC_Hoff	2012	7	16	c.e.sum	A	198	0.722826	MC_Hoff	26	-121.669	37.8974	68	5	5	1.09658	0.681341	1525	1999	3086	2918	4280	3919	5037	3730	5427	1525	2654	2841	4061	3392	4667	2928	4934	1.999	3.086	2.918	4.28	3.919	5.037	3.73	5.427	1.525	2.654	2.841	4.061	3.392	4.667	2.928	4.934
2012.7.MM_HoffmanOrchard	2012	7	16	c.e.sum	A	198	0.722826	MM_HoffmanOrchard	31	-121.669	37.8892	96	7	8	0.951109	0.488773	2997	2877	4880	4595	5916	5106	6794	5855	7017	2997	5197	4977	6038	5186	6944	6604	7556	2.877	4.88	4.595	5.916	5.106	6.794	5.855	7.017	2.997	5.197	4.977	6.038	5.186	6.944	6.604	7.556
2012.7.BDM_Fred	2012	7	16	c.e.sum	N	198	0.722826	BDM_Fred	4	-121.828	37.9656	54	6	6	0.621939	0.347111	1394	1389	2181	1480	2202	1401	2338	1797	2948	1394	2186	1485	2195	1406	2344	1807	2957	1.389	2.181	1.48	2.202	1.401	2.338	1.797	2.948	1.394	2.186	1.485	2.195	1.406	2.344	1.807	2.957
2012.7.BDM_Somers	2012	7	18	c.e.sum	N	200	0.733696	BDM_Somers	6	-121.862	37.9572	63	3	4	0.474482	0.431892	2608	2585	3924	2609	4154	2522	3755	2890	4603	2608	3967	2642	4201	2550	3780	2901	4606	2.585	3.924	2.609	4.154	2.522	3.755	2.89	4.603	2.608	3.967	2.642	4.201	2.55	3.78	2.901	4.606
2012.7.LV_entrance	2012	7	18	c.e.sum	N	200	0.733696	LV_entrance	22	-121.699	37.8717	126	11	8	0.691975	0.288576	1556	1542	2536	1612	2663	1608	2605	1727	2654	1556	2582	1638	2707	1632	2639	1761	2673	1.542	2.536	1.612	2.663	1.608	2.605	1.727	2.654	1.556	2.582	1.638	2.707	1.632	2.639	1.761	2.673
2012.7.LV_MC	2012	7	16	c.e.sum	N	198	0.722826	LV_MC	23	-121.729	37.8719	7	2	2	0.636514	0.918296	1970	1962	2720	2040	2992	2171	3477	2218	3435	1970	2731	2051	3006	2180	3500	2213	3442	1.962	2.72	2.04	2.992	2.171	3.477	2.218	3.435	1.97	2.731	2.051	3.006	2.18	3.5	2.213	3.442
2012.7.LV_Npond	2012	7	18	c.e.sum	N	200	0.733696	LV_Npond	24	-121.718	37.8458	130	7	6	0.475991	0.244611	1940	1922	3014	1982	3057	2000	3180	2109	3354	1940	3163	2133	3211	2146	3250	2153	3211	1.922	3.014	1.982	3.057	2	3.18	2.109	3.354	1.94	3.163	2.133	3.211	2.146	3.25	2.153	3.211
2012.7.LV_office	2012	7	18	c.e.sum	N	200	0.733696	LV_office	25	-121.696	37.8536	196	8	6	0.371297	0.178556	1638	1593	2397	1603	2368	1634	2538	1594	2535	1638	2440	1605	2361	1593	2508	1517	2442	1.593	2.397	1.603	2.368	1.634	2.538	1.594	2.535	1.638	2.44	1.605	2.361	1.593	2.508	1.517	2.442
2012.7.MC_Res	2012	7	16	c.e.sum	N	198	0.722826	MC_Res	27	-121.724	37.8853	19	4	4	1.22061	0.880482	1652	2024	3099	1876	3281	1821	3383	1799	3712	1652	2675	1729	3013	1698	2696	1965	3565	2.024	3.099	1.876	3.281	1.821	3.383	1.799	3.712	1.652	2.675	1.729	3.013	1.698	2.696	1.965	3.565
2012.7.RV	2012	7	17	c.e.sum	N	199	0.728261	RV	34	-121.75	37.8681	205	6	5	0.348007	0.194226	2170	1948	2915	2037	3293	2156	3280	2493	3698	2170	3160	2141	3468	2198	3459	2595	3784	1.948	2.915	2.037	3.293	2.156	3.28	2.493	3.698	2.17	3.16	2.141	3.468	2.198	3.459	2.595	3.784
2012.7.A_F	2012	7	18	c.e.sum	U	200	0.733696	A_F	1	-121.723	37.9214	212	3	3	0.196676	0.179022	3353	2988	4209	2650	4124	2830	4289	2957	4575	3353	4487	2806	4316	2927	4456	3085	4820	2.988	4.209	2.65	4.124	2.83	4.289	2.957	4.575	3.353	4.487	2.806	4.316	2.927	4.456	3.085	4.82
2012.7.BV_F	2012	7	16	c.e.sum	U	198	0.722826	BV_F	8	-121.724	37.9369	72	6	6	1.37639	0.768176	2336	2267	3623	2187	3519	2424	3874	2412	3831	2336	3702	2185	3488	2408	3959	2536	3904	2.267	3.623	2.187	3.519	2.424	3.874	2.412	3.831	2.336	3.702	2.185	3.488	2.408	3.959	2.536	3.904
2012.7.DV_H	2012	7	18	c.e.sum	U	200	0.733696	DV_H	16	-121.783	37.9936	97	8	8	1.06143	0.510438	2205	1777	2785	2007	3145	1826	3018	1726	3012	2205	3199	2558	3589	2249	3615	2110	3628	1.777	2.785	2.007	3.145	1.826	3.018	1.726	3.012	2.205	3.199	2.558	3.589	2.249	3.615	2.11	3.628
2012.7.MCP	2012	7	16	c.e.sum	U	198	0.722826	MCP	30	-121.742	37.9353	65	6	6	1.54122	0.86017	2684	2790	3973	2675	3910	2823	4042	2576	3907	2684	3650	2515	3948	2562	3987	2339	3763	2.79	3.973	2.675	3.91	2.823	4.042	2.576	3.907	2.684	3.65	2.515	3.948	2.562	3.987	2.339	3.763
2012.7.MV_RG	2012	7	18	c.e.sum	U	200	0.733696	MV_RG	32	-121.826	37.995	87	8	8	0.915815	0.440414	2055	1992	3147	2060	3178	1952	3181	1768	3054	2055	3150	2116	3183	1973	3211	1756	3039	1.992	3.147	2.06	3.178	1.952	3.181	1.768	3.054	2.055	3.15	2.116	3.183	1.973	3.211	1.756	3.039
2012.7.Pippo	2012	7	16	c.e.sum	U	198	0.722826	Pippo	33	-121.701	37.9269	134	2	3	0.167944	0.242292	1966	2055	3245	2084	3267	2074	3266	2064	3373	1966	3302	1977	3297	2101	3321	2291	3624	2.055	3.245	2.084	3.267	2.074	3.266	2.064	3.373	1.966	3.302	1.977	3.297	2.101	3.321	2.291	3.624
2012.7.Tahoe	2012	7	18	c.e.sum	U	200	0.733696	Tahoe	35	-121.8	37.9894	13	2	3	0.693147	1	2353	2538	4004	2407	4121	2523	3992	2441	4040	2353	3606	1912	3964	1958	3352	1958	3517	2.538	4.004	2.407	4.121	2.523	3.992	2.441	4.04	2.353	3.606	1.912	3.964	1.958	3.352	1.958	3.517
2012.9.Arabian_Lane	2012	9	3	d.l.sum	A	247	0.98913	Arabian_Lane	2	-121.666	37.9444	329	5	5	1.27356	0.791306	2161	2107	3767	2528	4170	2582	3996	2736	4671	2161	3937	2629	4484	2648	4020	2669	4859	2.107	3.767	2.528	4.17	2.582	3.996	2.736	4.671	2.161	3.937	2.629	4.484	2.648	4.02	2.669	4.859
2012.9.Balfour_Tower	2012	9	3	d.l.sum	A	247	0.98913	Balfour_Tower	3	-121.629	37.9256	102	5	6	0.529309	0.328878	2512	2092	3463	2607	3991	3710	4959	3900	5366	2512	4003	3453	4893	4636	5724	3853	5321	2.092	3.463	2.607	3.991	3.71	4.959	3.9	5.366	2.512	4.003	3.453	4.893	4.636	5.724	3.853	5.321
2012.9.Brentwood_Sellers	2012	9	5	d.l.sum	A	249	1	Brentwood_Sellers	7	-121.678	37.9128	28	5	6	1.07681	0.66906	1488	1566	2705	1829	3235	2590	3935	3199	4486	1488	2619	2145	3848	1771	3120	2711	3861	1.566	2.705	1.829	3.235	2.59	3.935	3.199	4.486	1.488	2.619	2.145	3.848	1.771	3.12	2.711	3.861
2012.9.Byron_Orwood	2012	9	3	d.l.sum	A	247	0.98913	Byron_Orwood	9	-121.639	37.94	170	6	5	0.917213	0.511906	4488	4176	5877	3390	4778	4202	5949	3141	4613	4488	6410	3103	4369	4765	6497	4010	5294	4.176	5.877	3.39	4.778	4.202	5.949	3.141	4.613	4.488	6.41	3.103	4.369	4.765	6.497	4.01	5.294
2012.9.Camino_Diablo	2012	9	5	d.l.sum	A	249	1	Camino_Diablo	10	-121.642	37.8697	20	3	3	0.518186	0.471673	1423	1514	2620	1611	2673	1768	2821	2286	3637	1423	2575	1414	2384	1590	2730	2402	3789	1.514	2.62	1.611	2.673	1.768	2.821	2.286	3.637	1.423	2.575	1.414	2.384	1.59	2.73	2.402	3.789
2012.9.Delta_Holland	2012	9	3	d.l.sum	A	247	0.98913	Delta_Holland	14	-121.618	37.9772	28	10	9	2.18703	0.949816	3755	3496	5794	3472	5762	4143	6371	4231	6360	3755	5912	3964	6028	4131	6065	3808	5883	3.496	5.794	3.472	5.762	4.143	6.371	4.231	6.36	3.755	5.912	3.964	6.028	4.131	6.065	3.808	5.883
2012.9.MC_Hoff	2012	9	5	d.l.sum	A	249	1	MC_Hoff	26	-121.669	37.8974	27	2	3	0.686962	0.991076	1860	1786	3193	1938	3065	1894	3366	1999	3086	1860	3510	1706	2814	2093	3721	1525	2654	1.786	3.193	1.938	3.065	1.894	3.366	1.999	3.086	1.86	3.51	1.706	2.814	2.093	3.721	1.525	2.654
2012.9.MM_HoffmanOrchard	2012	9	5	d.l.sum	A	249	1	MM_HoffmanOrchard	31	-121.669	37.8892	33	2	3	0.178845	0.258019	2458	2523	4202	2579	3936	2654	4542	2877	4880	2458	4156	2544	3741	2579	4695	2997	5197	2.523	4.202	2.579	3.936	2.654	4.542	2.877	4.88	2.458	4.156	2.544	3.741	2.579	4.695	2.997	5.197
2012.9.BDM_Fred	2012	9	3	d.l.sum	N	247	0.98913	BDM_Fred	4	-121.828	37.9656	41	7	8	1.00127	0.514552	1287	1283	2089	1304	2098	1404	2249	1389	2181	1287	2092	1308	2101	1412	2257	1394	2186	1.283	2.089	1.304	2.098	1.404	2.249	1.389	2.181	1.287	2.092	1.308	2.101	1.412	2.257	1.394	2.186
2012.9.BDM_Somers	2012	9	3	d.l.sum	N	247	0.98913	BDM_Somers	6	-121.862	37.9572	29	6	6	1.54031	0.859661	2215	2192	3604	2299	3785	2216	3563	2585	3924	2215	3645	2336	3852	2239	3590	2608	3967	2.192	3.604	2.299	3.785	2.216	3.563	2.585	3.924	2.215	3.645	2.336	3.852	2.239	3.59	2.608	3.967
2012.9.LV_entrance	2012	9	5	d.l.sum	N	249	1	LV_entrance	22	-121.699	37.8717	41	6	6	1.0961	0.611747	1574	1559	2526	1547	2466	1550	2483	1542	2536	1574	2564	1579	2507	1572	2509	1556	2582	1.559	2.526	1.547	2.466	1.55	2.483	1.542	2.536	1.574	2.564	1.579	2.507	1.572	2.509	1.556	2.582
2012.9.LV_MC	2012	9	3	d.l.sum	N	247	0.98913	LV_MC	23	-121.729	37.8719	26	1	2	0	NA	1587	1602	2448	1638	2536	1943	2793	1962	2720	1587	2430	1627	2529	1957	2796	1970	2731	1.602	2.448	1.638	2.536	1.943	2.793	1.962	2.72	1.587	2.43	1.627	2.529	1.957	2.796	1.97	2.731
2012.9.LV_Npond	2012	9	5	d.l.sum	N	249	1	LV_Npond	24	-121.718	37.8458	24	2	3	0.178845	0.258019	1972	1833	2920	1912	2974	1927	2911	1922	3014	1972	3175	1987	3122	1989	3136	1940	3163	1.833	2.92	1.912	2.974	1.927	2.911	1.922	3.014	1.972	3.175	1.987	3.122	1.989	3.136	1.94	3.163
2012.9.LV_office	2012	9	5	d.l.sum	N	249	1	LV_office	25	-121.696	37.8536	55	3	3	0.746033	0.679068	1546	1509	2351	1552	2398	1567	2402	1593	2397	1546	2381	1565	2411	1611	2435	1638	2440	1.509	2.351	1.552	2.398	1.567	2.402	1.593	2.397	1.546	2.381	1.565	2.411	1.611	2.435	1.638	2.44
2012.9.MC_Res	2012	9	3	d.l.sum	N	247	0.98913	MC_Res	27	-121.724	37.8853	53	4	5	0.395372	0.285201	1535	1775	2956	1552	2823	1934	3269	2024	3099	1535	2419	1563	2398	1652	2756	1652	2675	1.775	2.956	1.552	2.823	1.934	3.269	2.024	3.099	1.535	2.419	1.563	2.398	1.652	2.756	1.652	2.675
2012.9.RV	2012	9	5	d.l.sum	N	249	1	RV	34	-121.75	37.8681	6	3	3	0.867563	0.78969	1725	1700	2678	1650	2488	1936	2832	1948	2915	1725	2847	1629	2466	2208	3193	2170	3160	1.7	2.678	1.65	2.488	1.936	2.832	1.948	2.915	1.725	2.847	1.629	2.466	2.208	3.193	2.17	3.16
2012.9.A_F	2012	9	5	d.l.sum	U	249	1	A_F	1	-121.723	37.9214	85	4	4	0.298774	0.21552	3188	2887	4559	2640	4255	2703	4322	2988	4209	3188	4972	2810	4520	2910	4611	3353	4487	2.887	4.559	2.64	4.255	2.703	4.322	2.988	4.209	3.188	4.972	2.81	4.52	2.91	4.611	3.353	4.487
2012.9.BV_F	2012	9	3	d.l.sum	U	247	0.98913	BV_F	8	-121.724	37.9369	35	5	5	1.12663	0.700012	2388	2244	3801	2237	3710	2320	3724	2267	3623	2388	3964	2361	3833	2425	3816	2336	3702	2.244	3.801	2.237	3.71	2.32	3.724	2.267	3.623	2.388	3.964	2.361	3.833	2.425	3.816	2.336	3.702
2012.9.Castellina	2012	9	5	d.l.sum	U	249	1	Castellina	11	-121.737	37.9361	62	5	6	0.33735	0.209607	2431	2585	4006	2792	4390	2580	3617	2517	4066	2431	3800	2625	4237	2428	3359	2390	3907	2.585	4.006	2.792	4.39	2.58	3.617	2.517	4.066	2.431	3.8	2.625	4.237	2.428	3.359	2.39	3.907
2012.9.DV_H	2012	9	3	d.l.sum	U	247	0.98913	DV_H	16	-121.783	37.9936	17	5	6	1.49418	0.928383	2061	1664	3007	1629	2926	1807	3144	1777	2785	2061	3730	1978	3315	1954	3700	2205	3199	1.664	3.007	1.629	2.926	1.807	3.144	1.777	2.785	2.061	3.73	1.978	3.315	1.954	3.7	2.205	3.199
2012.9.MCP	2012	9	5	d.l.sum	U	249	1	MCP	30	-121.742	37.9353	38	5	5	1.32296	0.822004	2408	2837	4052	2670	3976	2872	4129	2790	3973	2408	3788	2155	3453	2371	3682	2684	3650	2.837	4.052	2.67	3.976	2.872	4.129	2.79	3.973	2.408	3.788	2.155	3.453	2.371	3.682	2.684	3.65
2012.9.MV_RG	2012	9	3	d.l.sum	U	247	0.98913	MV_RG	32	-121.826	37.995	22	4	5	1.00272	0.723308	1676	1673	3063	1718	3096	2002	3230	1992	3147	1676	3060	1726	3089	2056	3224	2055	3150	1.673	3.063	1.718	3.096	2.002	3.23	1.992	3.147	1.676	3.06	1.726	3.089	2.056	3.224	2.055	3.15
2012.9.Pippo	2012	9	5	d.l.sum	U	249	1	Pippo	33	-121.701	37.9269	91	5	5	0.708427	0.440171	1770	1667	3142	1740	3152	1791	3125	2055	3245	1770	3297	1812	3158	1865	3241	1966	3302	1.667	3.142	1.74	3.152	1.791	3.125	2.055	3.245	1.77	3.297	1.812	3.158	1.865	3.241	1.966	3.302
2012.9.Tahoe	2012	9	3	d.l.sum	U	247	0.98913	Tahoe	35	-121.8	37.9894	27	3	4	0.853236	0.776649	1689	2090	3892	2551	4100	2475	3969	2538	4004	1689	3311	2293	3661	2333	3653	2353	3606	2.09	3.892	2.551	4.1	2.475	3.969	2.538	4.004	1.689	3.311	2.293	3.661	2.333	3.653	2.353	3.606

## Sheet: evi
land	date	product	band	stddev	mode	mean	median	min	max	range	sum	variance	tot_pixels	pixels_pass_qa	per_cent_pixels_pass_qa
agr	A2000049	MOD13Q1	250m_16_days_EVI	0.166	0.1862	0.3158	0.2979	-0.0509	0.907	0.9579	4557.38	0.0276	14429	14429	100
agr	A2000065	MOD13Q1	250m_16_days_EVI	0.1677	0.3498	0.3997	0.3923	-0.0491	0.9774	1.0265	5767.03	0.0281	14429	14427	99.99
agr	A2000081	MOD13Q1	250m_16_days_EVI	0.1813	0.3982	0.4506	0.4525	-0.0231	0.9888	1.0119	6500.53	0.0329	14429	14427	99.99
agr	A2000097	MOD13Q1	250m_16_days_EVI	0.1797	0.3157	0.3835	0.3894	-0.0531	0.9476	1.0007	5533.59	0.0323	14429	14429	100
agr	A2000113	MOD13Q1	250m_16_days_EVI	0.1785	0.3941	0.396	0.3947	-0.0476	0.9893	1.0369	5714.31	0.0319	14429	14429	100
agr	A2000129	MOD13Q1	250m_16_days_EVI	0.1604	0.2873	0.3461	0.3338	-0.0738	0.9921	1.0659	4993.33	0.0257	14429	14429	100
agr	A2000145	MOD13Q1	250m_16_days_EVI	0.1662	0.3015	0.3755	0.3524	-0.0946	0.9684	1.063	5417.95	0.0276	14429	14429	100
agr	A2000161	MOD13Q1	250m_16_days_EVI	0.1686	0.2155	0.392	0.3807	-0.0466	0.9662	1.0128	5655.48	0.0284	14429	14429	100
agr	A2000177	MOD13Q1	250m_16_days_EVI	0.1696	0.4052	0.4122	0.4068	-0.1074	0.9622	1.0696	5947.7	0.0288	14429	14429	100
agr	A2000193	MOD13Q1	250m_16_days_EVI	0.1697	0.4859	0.4343	0.4405	-0.091	0.9818	1.0728	6266.12	0.0288	14429	14429	100
agr	A2000209	MOD13Q1	250m_16_days_EVI	0.1674	0.4077	0.4158	0.4157	-0.0582	0.9539	1.0121	5999.88	0.028	14429	14429	100
agr	A2000225	MOD13Q1	250m_16_days_EVI	0.1591	0.3015	0.3974	0.3962	-0.0432	0.9014	0.9446	5733.41	0.0253	14429	14429	100
agr	A2000241	MOD13Q1	250m_16_days_EVI	0.1597	0.491	0.3925	0.3904	-0.0504	0.904	0.9544	5662.53	0.0255	14429	14428	99.99
agr	A2000257	MOD13Q1	250m_16_days_EVI	0.1569	0.2887	0.3595	0.3444	-0.0596	0.9163	0.9759	5186.83	0.0246	14429	14429	100
agr	A2000273	MOD13Q1	250m_16_days_EVI	0.1596	0.2057	0.3069	0.2757	-0.0664	0.8598	0.9262	4428.07	0.0255	14429	14429	100
agr	A2000289	MOD13Q1	250m_16_days_EVI	0.1661	0.1374	0.2885	0.2508	-0.0541	0.9412	0.9953	4162.14	0.0276	14429	14429	100
agr	A2000305	MOD13Q1	250m_16_days_EVI	0.1487	0.2266	0.2839	0.2568	-0.0484	0.8727	0.9211	4095.86	0.0221	14429	14429	100
agr	A2000321	MOD13Q1	250m_16_days_EVI	0.122	0.1575	0.2343	0.2095	-0.0606	0.9825	1.0431	3380.73	0.0149	14429	14426	99.98
agr	A2000337	MOD13Q1	250m_16_days_EVI	0.1142	0.1044	0.2105	0.1947	-0.0413	0.8832	0.9245	3037.17	0.0131	14429	14429	100
agr	A2000353	MOD13Q1	250m_16_days_EVI	0.1129	0.1251	0.2227	0.2083	-0.0677	0.9193	0.987	3213.66	0.0128	14429	14429	100
agr	A2001001	MOD13Q1	250m_16_days_EVI	0.119	0.0989	0.2218	0.2039	-0.0526	0.8256	0.8782	3200.91	0.0142	14429	14429	100
agr	A2001017	MOD13Q1	250m_16_days_EVI	0.1249	0.2158	0.2487	0.2325	-0.0612	0.9015	0.9627	3587.05	0.0156	14429	14424	99.97
agr	A2001033	MOD13Q1	250m_16_days_EVI	0.139	0.2609	0.2918	0.2756	-0.0671	0.9025	0.9696	4210.09	0.0193	14429	14427	99.99
agr	A2001049	MOD13Q1	250m_16_days_EVI	0.169	0.3906	0.3514	0.3377	-0.0475	0.983	1.0305	5067.71	0.0286	14429	14421	99.94
agr	A2001065	MOD13Q1	250m_16_days_EVI	0.1724	0.373	0.4538	0.4532	-0.0664	0.9723	1.0387	6548.54	0.0297	14429	14429	100
agr	A2001081	MOD13Q1	250m_16_days_EVI	0.1735	0.4131	0.492	0.4895	0.0182	0.9913	0.9731	7099.55	0.0301	14429	14429	100
agr	A2001097	MOD13Q1	250m_16_days_EVI	0.1774	0.38	0.357	0.3396	-0.0483	0.9198	0.9681	5151.83	0.0315	14429	14429	100
agr	A2001113	MOD13Q1	250m_16_days_EVI	0.1725	0.1271	0.3873	0.3788	-0.0714	0.9502	1.0216	5587.79	0.0298	14429	14427	99.99
agr	A2001129	MOD13Q1	250m_16_days_EVI	0.1563	0.3866	0.3372	0.3121	-0.0874	0.9399	1.0273	4865.63	0.0244	14429	14428	99.99
agr	A2001145	MOD13Q1	250m_16_days_EVI	0.162	0.5596	0.3567	0.3305	-0.104	0.9625	1.0665	5147.47	0.0263	14429	14429	100
agr	A2001161	MOD13Q1	250m_16_days_EVI	0.149	0.2584	0.3264	0.3024	-0.0829	0.9836	1.0665	4706.9	0.0222	14429	14422	99.95
agr	A2001177	MOD13Q1	250m_16_days_EVI	0.1647	0.3231	0.3792	0.3677	-0.0927	0.9894	1.0821	5471.78	0.0271	14429	14429	100
agr	A2001193	MOD13Q1	250m_16_days_EVI	0.1691	0.1519	0.4181	0.4213	-0.1033	0.9383	1.0416	6032.62	0.0286	14429	14429	100
agr	A2001209	MOD13Q1	250m_16_days_EVI	0.1777	0.5554	0.4259	0.4299	-0.0847	0.9678	1.0525	6145.29	0.0316	14429	14429	100
agr	A2001225	MOD13Q1	250m_16_days_EVI	0.1711	0.3343	0.4078	0.4094	-0.0585	0.9985	1.057	5883.78	0.0293	14429	14428	99.99
agr	A2001241	MOD13Q1	250m_16_days_EVI	0.1669	0.245	0.3798	0.3691	-0.0694	0.9324	1.0018	5480.31	0.0279	14429	14429	100
agr	A2001257	MOD13Q1	250m_16_days_EVI	0.168	0.2782	0.3615	0.3423	-0.0642	0.9481	1.0123	5215.99	0.0282	14429	14429	100
agr	A2001273	MOD13Q1	250m_16_days_EVI	0.168	0.1308	0.326	0.2936	-0.0686	0.9792	1.0478	4703.48	0.0282	14429	14429	100
agr	A2001289	MOD13Q1	250m_16_days_EVI	0.1564	0.1858	0.2826	0.2451	-0.0695	0.9202	0.9897	4077.65	0.0245	14429	14429	100
agr	A2001305	MOD13Q1	250m_16_days_EVI	0.1403	0.1684	0.246	0.2075	-0.0559	0.9408	0.9967	3547.96	0.0197	14429	14425	99.97
agr	A2001321	MOD13Q1	250m_16_days_EVI	0.1231	0.113	0.2337	0.2089	-0.0541	0.7544	0.8085	3372.1	0.0152	14429	14428	99.99
agr	A2001337	MOD13Q1	250m_16_days_EVI	0.1218	0.3336	0.243	0.2246	-0.0526	0.8002	0.8528	3505.37	0.0148	14429	14428	99.99
agr	A2001353	MOD13Q1	250m_16_days_EVI	0.1296	0.3484	0.3256	0.3155	-0.0508	0.9125	0.9633	4650.97	0.0168	14429	14285	99
agr	A2002001	MOD13Q1	250m_16_days_EVI	0.1386	0.2768	0.2985	0.2806	-0.0642	0.9125	0.9767	4303.77	0.0192	14429	14420	99.94
agr	A2002017	MOD13Q1	250m_16_days_EVI	0.1316	0.1943	0.2974	0.2783	-0.0472	0.8337	0.8809	4290.79	0.0173	14429	14426	99.98
agr	A2002033	MOD13Q1	250m_16_days_EVI	0.1411	0.2631	0.3123	0.2895	-0.0456	0.8543	0.8999	4506.16	0.0199	14429	14427	99.99
agr	A2002049	MOD13Q1	250m_16_days_EVI	0.1764	0.5529	0.4125	0.4136	-0.0452	0.9527	0.9979	5951.75	0.0311	14429	14429	100
agr	A2002065	MOD13Q1	250m_16_days_EVI	0.1912	0.5997	0.4266	0.4364	-0.0349	0.9691	1.004	6154.82	0.0366	14429	14429	100
agr	A2002081	MOD13Q1	250m_16_days_EVI	0.199	0.5969	0.4576	0.4701	-0.0439	0.9903	1.0342	6602.94	0.0396	14429	14429	100
agr	A2002097	MOD13Q1	250m_16_days_EVI	0.1851	0.1257	0.4116	0.4154	-0.0489	0.966	1.0149	5939.17	0.0343	14429	14429	100
agr	A2002113	MOD13Q1	250m_16_days_EVI	0.158	0.3542	0.423	0.417	-0.0779	0.9833	1.0612	6103.92	0.025	14429	14429	100
agr	A2002129	MOD13Q1	250m_16_days_EVI	0.1783	0.3403	0.3771	0.3559	-0.0835	0.9687	1.0522	5440.52	0.0318	14429	14429	100
agr	A2002145	MOD13Q1	250m_16_days_EVI	0.1787	0.1938	0.3671	0.3373	-0.0929	0.9906	1.0835	5297.6	0.0319	14429	14429	100
agr	A2002161	MOD13Q1	250m_16_days_EVI	0.1698	0.2883	0.3826	0.3667	-0.096	0.9896	1.0856	5520.93	0.0288	14429	14429	100
agr	A2002177	MOD13Q1	250m_16_days_EVI	0.1709	0.4738	0.4024	0.3967	-0.1032	0.9783	1.0815	5804.39	0.0292	14429	14426	99.98
agr	A2002193	MOD13Q1	250m_16_days_EVI	0.1725	0.3806	0.4156	0.4129	-0.0809	0.9908	1.0717	5996.9	0.0298	14429	14429	100
agr	A2002209	MOD13Q1	250m_16_days_EVI	0.172	0.4297	0.4254	0.431	-0.0787	0.927	1.0057	6136.4	0.0296	14429	14425	99.97
agr	A2002225	MOD13Q1	250m_16_days_EVI	0.1615	0.4626	0.3767	0.3634	-0.0877	0.9905	1.0782	5435.34	0.0261	14429	14429	100
agr	A2002241	MOD13Q1	250m_16_days_EVI	0.1584	0.3943	0.3976	0.3994	-0.0492	0.9715	1.0207	5737.64	0.0251	14429	14429	100
agr	A2002257	MOD13Q1	250m_16_days_EVI	0.1684	0.2903	0.3672	0.3454	-0.0808	0.9649	1.0457	5298.1	0.0284	14429	14429	100
agr	A2002273	MOD13Q1	250m_16_days_EVI	0.1555	0.1422	0.3146	0.2829	-0.0761	0.9342	1.0103	4538.74	0.0242	14429	14429	100
agr	A2002289	MOD13Q1	250m_16_days_EVI	0.1513	0.1533	0.2867	0.249	-0.073	0.9953	1.0683	4136.07	0.0229	14429	14426	99.98
agr	A2002305	MOD13Q1	250m_16_days_EVI	0.1325	0.1014	0.2301	0.1921	-0.0506	0.8203	0.8709	3304.31	0.0175	14429	14361	99.53
agr	A2002321	MOD13Q1	250m_16_days_EVI	0.1271	0.1283	0.2302	0.2029	-0.0457	0.8063	0.852	3322.15	0.0161	14429	14429	100
agr	A2002337	MOD13Q1	250m_16_days_EVI	0.1178	0.1176	0.2277	0.2092	-0.0428	0.8004	0.8432	3285.05	0.0139	14429	14428	99.99
agr	A2002353	MOD13Q1	250m_16_days_EVI	0.1209	0.0876	0.2161	0.1984	-0.0724	0.833	0.9054	3117.53	0.0146	14429	14427	99.99
agr	A2003001	MOD13Q1	250m_16_days_EVI	0.1413	0.207	0.2772	0.2499	-0.0705	0.9477	1.0182	3976.83	0.02	14429	14349	99.45
agr	A2003017	MOD13Q1	250m_16_days_EVI	0.152	0.234	0.354	0.3387	-0.0935	0.9485	1.042	4745.07	0.0231	14429	13405	92.9
agr	A2003033	MOD13Q1	250m_16_days_EVI	0.1562	0.3545	0.3976	0.3875	-0.0435	0.9736	1.0171	5736.86	0.0244	14429	14429	100
agr	A2003049	MOD13Q1	250m_16_days_EVI	0.1834	0.3864	0.4453	0.4502	-0.0418	0.9538	0.9956	6424.95	0.0336	14429	14429	100
agr	A2003065	MOD13Q1	250m_16_days_EVI	0.188	0.481	0.4687	0.4867	-0.0353	0.9572	0.9925	6762.36	0.0353	14429	14429	100
agr	A2003081	MOD13Q1	250m_16_days_EVI	0.1883	0.4761	0.4516	0.4703	-0.0519	0.9842	1.0361	6512.84	0.0355	14429	14423	99.96
agr	A2003097	MOD13Q1	250m_16_days_EVI	0.1835	0.3811	0.4216	0.4315	-0.0442	0.9916	1.0358	6083.46	0.0337	14429	14429	100
agr	A2003113	MOD13Q1	250m_16_days_EVI	0.1738	0.1198	0.3618	0.3567	-0.0842	0.8999	0.9841	5219.3	0.0302	14429	14424	99.97
agr	A2003129	MOD13Q1	250m_16_days_EVI	0.1763	0.43	0.3903	0.3814	-0.0606	0.9867	1.0473	5631.22	0.0311	14429	14429	100
agr	A2003145	MOD13Q1	250m_16_days_EVI	0.1701	0.2459	0.3613	0.3336	-0.0775	0.9984	1.0759	5213.4	0.0289	14429	14429	100
agr	A2003161	MOD13Q1	250m_16_days_EVI	0.1592	0.2881	0.3694	0.3517	-0.0833	0.9972	1.0805	5329.69	0.0254	14429	14429	100
agr	A2003177	MOD13Q1	250m_16_days_EVI	0.1707	0.4054	0.406	0.401	-0.0924	0.9905	1.0829	5858.1	0.0291	14429	14429	100
agr	A2003193	MOD13Q1	250m_16_days_EVI	0.1763	0.4122	0.424	0.424	-0.0898	0.9675	1.0573	6117.79	0.0311	14429	14429	100
agr	A2003209	MOD13Q1	250m_16_days_EVI	0.1791	0.4115	0.4281	0.4291	-0.0635	0.9514	1.0149	6176.71	0.0321	14429	14429	100
agr	A2003225	MOD13Q1	250m_16_days_EVI	0.177	0.5328	0.4265	0.4298	-0.0555	0.9789	1.0344	6153.88	0.0313	14429	14429	100
agr	A2003241	MOD13Q1	250m_16_days_EVI	0.165	0.394	0.3818	0.3731	-0.0643	0.9669	1.0312	5509.36	0.0272	14429	14429	100
agr	A2003257	MOD13Q1	250m_16_days_EVI	0.1597	0.3389	0.3563	0.3394	-0.0618	0.9135	0.9753	5141.11	0.0255	14429	14429	100
agr	A2003273	MOD13Q1	250m_16_days_EVI	0.1592	0.1685	0.318	0.2857	-0.0661	0.9625	1.0286	4588.85	0.0253	14429	14429	100
agr	A2003289	MOD13Q1	250m_16_days_EVI	0.141	0.202	0.2794	0.2486	-0.0743	0.8958	0.9701	4029.3	0.0199	14429	14422	99.95
agr	A2003305	MOD13Q1	250m_16_days_EVI	0.1366	0.1251	0.2374	0.2018	-0.0616	0.8381	0.8997	3402.56	0.0187	14429	14333	99.33
agr	A2003321	MOD13Q1	250m_16_days_EVI	0.1284	0.1397	0.2286	0.1942	-0.0615	0.7983	0.8598	3287.01	0.0165	14429	14379	99.65
agr	A2003337	MOD13Q1	250m_16_days_EVI	0.1131	0.1102	0.2081	0.1895	-0.0297	0.811	0.8407	3001.71	0.0128	14429	14427	99.99
agr	A2003353	MOD13Q1	250m_16_days_EVI	0.1215	0.2272	0.2311	0.2113	-0.0345	0.8585	0.893	3332.47	0.0148	14429	14421	99.94
agr	A2004001	MOD13Q1	250m_16_days_EVI	0.1211	0.2606	0.2304	0.2096	-0.0593	0.8581	0.9174	3322.79	0.0147	14429	14421	99.94
agr	A2004017	MOD13Q1	250m_16_days_EVI	0.149	0.3188	0.3009	0.2719	-0.0439	0.9076	0.9515	4335.17	0.0222	14429	14409	99.86
agr	A2004033	MOD13Q1	250m_16_days_EVI	0.157	0.2478	0.3533	0.3286	-0.0427	0.903	0.9457	5097.18	0.0246	14429	14429	100
agr	A2004049	MOD13Q1	250m_16_days_EVI	0.197	0.346	0.4666	0.4629	-0.0598	0.9849	1.0447	6732.08	0.0388	14429	14427	99.99
agr	A2004065	MOD13Q1	250m_16_days_EVI	0.1799	0.6295	0.5111	0.5235	-0.0471	0.9914	1.0385	7374.73	0.0324	14429	14429	100
agr	A2004081	MOD13Q1	250m_16_days_EVI	0.1959	0.5839	0.4562	0.4621	-0.0396	0.9611	1.0007	6581.86	0.0384	14429	14429	100
agr	A2004097	MOD13Q1	250m_16_days_EVI	0.1678	0.1237	0.3653	0.3574	-0.0555	0.9271	0.9826	5270.9	0.0282	14429	14429	100
agr	A2004113	MOD13Q1	250m_16_days_EVI	0.173	0.1789	0.3734	0.3647	-0.0465	0.9494	0.9959	5387.21	0.0299	14429	14429	100
agr	A2004129	MOD13Q1	250m_16_days_EVI	0.1587	0.1511	0.3243	0.2968	-0.0908	0.9531	1.0439	4679.67	0.0252	14429	14429	100
agr	A2004145	MOD13Q1	250m_16_days_EVI	0.1751	0.138	0.3534	0.3214	-0.0817	0.9863	1.068	5098.03	0.0307	14429	14426	99.98
agr	A2004161	MOD13Q1	250m_16_days_EVI	0.1741	0.3086	0.3566	0.3438	-0.0965	0.993	1.0895	5145.41	0.0303	14429	14428	99.99
agr	A2004177	MOD13Q1	250m_16_days_EVI	0.1798	-0.0103	0.3906	0.3871	-0.0943	0.9873	1.0816	5635.6	0.0323	14429	14429	100
agr	A2004193	MOD13Q1	250m_16_days_EVI	0.1825	0.4163	0.4093	0.4175	-0.09	0.9766	1.0666	5905.32	0.0333	14429	14429	100
agr	A2004209	MOD13Q1	250m_16_days_EVI	0.1839	0.3185	0.4146	0.4258	-0.0923	0.9515	1.0438	5982.75	0.0338	14429	14429	100
agr	A2004225	MOD13Q1	250m_16_days_EVI	0.1761	0.3783	0.3969	0.4032	-0.0736	0.9667	1.0403	5716.08	0.031	14429	14403	99.82
agr	A2004241	MOD13Q1	250m_16_days_EVI	0.1707	0.1506	0.3734	0.3717	-0.0483	0.9371	0.9854	5387.56	0.0291	14429	14429	100
agr	A2004257	MOD13Q1	250m_16_days_EVI	0.1655	0.1662	0.3415	0.3244	-0.046	0.901	0.947	4926.94	0.0274	14429	14429	100
agr	A2004273	MOD13Q1	250m_16_days_EVI	0.1659	0.3049	0.3181	0.2897	-0.0729	0.9538	1.0267	4577.69	0.0275	14429	14391	99.74
agr	A2004289	MOD13Q1	250m_16_days_EVI	0.1437	0.1044	0.2523	0.2191	-0.0382	0.943	0.9812	3637.8	0.0207	14429	14420	99.94
agr	A2004305	MOD13Q1	250m_16_days_EVI	0.1432	0.146	0.2744	0.2545	-0.0456	0.9046	0.9502	3958.78	0.0205	14429	14429	100
agr	A2004321	MOD13Q1	250m_16_days_EVI	0.1388	0.3793	0.3139	0.3059	-0.0412	0.8339	0.8751	4528.45	0.0193	14429	14426	99.98
agr	A2004337	MOD13Q1	250m_16_days_EVI	0.1236	0.2795	0.2558	0.2462	-0.039	0.8257	0.8647	3691.34	0.0153	14429	14429	100
agr	A2004353	MOD13Q1	250m_16_days_EVI	0.131	0.1785	0.2737	0.2574	-0.0531	0.9193	0.9724	3947.74	0.0172	14429	14426	99.98
agr	A2005001	MOD13Q1	250m_16_days_EVI	0.1485	0.1278	0.2645	0.2328	-0.0529	0.9904	1.0433	2973.15	0.0221	14429	11239	77.89
agr	A2005017	MOD13Q1	250m_16_days_EVI	0.1589	0.2571	0.3462	0.3227	-0.0493	0.9162	0.9655	4992.81	0.0252	14429	14422	99.95
agr	A2005033	MOD13Q1	250m_16_days_EVI	0.1564	0.2497	0.3425	0.3217	-0.0492	0.9479	0.9971	4941.56	0.0245	14429	14429	100
agr	A2005049	MOD13Q1	250m_16_days_EVI	0.1706	0.5359	0.4435	0.4558	-0.0318	0.9384	0.9702	6399.1	0.0291	14429	14428	99.99
agr	A2005065	MOD13Q1	250m_16_days_EVI	0.1756	0.6005	0.4567	0.4749	-0.0428	0.9533	0.9961	6589.69	0.0308	14429	14429	100
agr	A2005081	MOD13Q1	250m_16_days_EVI	0.1828	0.5775	0.4609	0.4796	-0.0472	0.9779	1.0251	6649.83	0.0334	14429	14429	100
agr	A2005097	MOD13Q1	250m_16_days_EVI	0.1677	0.5248	0.4524	0.4622	-0.0305	0.939	0.9695	6527.37	0.0281	14429	14429	100
agr	A2005113	MOD13Q1	250m_16_days_EVI	0.1669	0.1434	0.3704	0.3727	-0.06	0.9311	0.9911	5343.76	0.0279	14429	14427	99.99
agr	A2005129	MOD13Q1	250m_16_days_EVI	0.1885	0.2509	0.3737	0.3539	-0.0571	0.9942	1.0513	5392.04	0.0355	14429	14427	99.99
agr	A2005145	MOD13Q1	250m_16_days_EVI	0.1622	0.1672	0.3421	0.3195	-0.0834	0.9515	1.0349	4935.69	0.0263	14429	14429	100
agr	A2005161	MOD13Q1	250m_16_days_EVI	0.1698	0.2283	0.3595	0.3414	-0.0708	0.9791	1.0499	5186.89	0.0288	14429	14429	100
agr	A2005177	MOD13Q1	250m_16_days_EVI	0.1722	0.5366	0.3907	0.3873	-0.0827	0.9991	1.0818	5637.52	0.0296	14429	14429	100
agr	A2005193	MOD13Q1	250m_16_days_EVI	0.1674	0.4005	0.4039	0.4115	-0.0757	0.9376	1.0133	5827.41	0.028	14429	14429	100
agr	A2005209	MOD13Q1	250m_16_days_EVI	0.1704	0.496	0.414	0.4288	-0.0863	0.9548	1.0411	5972.99	0.029	14429	14429	100
agr	A2005225	MOD13Q1	250m_16_days_EVI	0.1716	0.3367	0.4115	0.4202	-0.0807	0.9389	1.0196	5936.93	0.0295	14429	14429	100
agr	A2005241	MOD13Q1	250m_16_days_EVI	0.1642	0.3382	0.3876	0.3882	-0.0499	0.9322	0.9821	5592.36	0.027	14429	14429	100
agr	A2005257	MOD13Q1	250m_16_days_EVI	0.1629	0.4081	0.3643	0.3555	-0.0564	0.9395	0.9959	5256.92	0.0265	14429	14429	100
agr	A2005273	MOD13Q1	250m_16_days_EVI	0.1583	0.2308	0.329	0.3075	-0.0417	0.9152	0.9569	4747.21	0.025	14429	14429	100
agr	A2005289	MOD13Q1	250m_16_days_EVI	0.1413	0.2129	0.2896	0.2628	-0.0475	0.8452	0.8927	4176.23	0.02	14429	14420	99.94
agr	A2005305	MOD13Q1	250m_16_days_EVI	0.1405	0.1206	0.2569	0.2239	-0.0545	0.8724	0.9269	3686.73	0.0197	14429	14352	99.47
agr	A2005321	MOD13Q1	250m_16_days_EVI	0.1294	0.1942	0.2384	0.2041	-0.0499	0.8031	0.853	3408.04	0.0167	14429	14298	99.09
agr	A2005337	MOD13Q1	250m_16_days_EVI	0.1145	0.1012	0.2039	0.1695	-0.0366	0.7797	0.8163	2937.96	0.0131	14429	14407	99.85
agr	A2005353	MOD13Q1	250m_16_days_EVI	0.0768	0.119	0.1517	0.134	-0.0146	0.651	0.6656	615.223	0.0059	14429	4056	28.11
agr	A2006001	MOD13Q1	250m_16_days_EVI	0.1059	0.194	0.2031	0.1884	-0.0728	0.8667	0.9395	2929.95	0.0112	14429	14429	100
agr	A2006017	MOD13Q1	250m_16_days_EVI	0.1087	0.2405	0.2292	0.2165	-0.0533	0.8521	0.9054	3307.2	0.0118	14429	14429	100
agr	A2006033	MOD13Q1	250m_16_days_EVI	0.1551	0.359	0.3618	0.3489	-0.0396	0.9244	0.964	5220.39	0.024	14429	14429	100
agr	A2006049	MOD13Q1	250m_16_days_EVI	0.1653	0.2839	0.3786	0.3656	-0.0272	0.9535	0.9807	5462.86	0.0273	14429	14429	100
agr	A2006065	MOD13Q1	250m_16_days_EVI	0.1903	0.5355	0.4166	0.4071	-0.048	0.9429	0.9909	6011.2	0.0362	14429	14428	99.99
agr	A2006081	MOD13Q1	250m_16_days_EVI	0.2046	0.4166	0.4523	0.4446	-0.0644	0.9997	1.0641	6031.68	0.0419	14429	13337	92.43
agr	A2006097	MOD13Q1	250m_16_days_EVI	0.184	0.57	0.4718	0.4809	-0.0541	0.9778	1.0319	6807.19	0.0339	14429	14429	100
agr	A2006113	MOD13Q1	250m_16_days_EVI	0.174	0.5059	0.4546	0.4633	-0.0649	0.9668	1.0317	6558.91	0.0303	14429	14429	100
agr	A2006129	MOD13Q1	250m_16_days_EVI	0.1627	0.42	0.3852	0.3839	-0.0381	0.9207	0.9588	5558.24	0.0265	14429	14429	100
agr	A2006145	MOD13Q1	250m_16_days_EVI	0.1639	0.3168	0.3628	0.3447	-0.0685	0.9519	1.0204	5234.81	0.0269	14429	14429	100
agr	A2006161	MOD13Q1	250m_16_days_EVI	0.1677	0.254	0.3587	0.3381	-0.0729	0.9748	1.0477	5176.12	0.0281	14429	14429	100
agr	A2006177	MOD13Q1	250m_16_days_EVI	0.1713	0.5366	0.3886	0.3765	-0.0746	0.9809	1.0555	5607.45	0.0293	14429	14429	100
agr	A2006193	MOD13Q1	250m_16_days_EVI	0.1734	0.4248	0.4125	0.4141	-0.0534	0.9914	1.0448	5952.55	0.0301	14429	14429	100
agr	A2006209	MOD13Q1	250m_16_days_EVI	0.1705	0.1901	0.4123	0.4181	-0.0699	0.9496	1.0195	5948.91	0.0291	14429	14429	100
agr	A2006225	MOD13Q1	250m_16_days_EVI	0.1741	0.4126	0.4108	0.4163	-0.0577	0.9272	0.9849	5926.86	0.0303	14429	14428	99.99
agr	A2006241	MOD13Q1	250m_16_days_EVI	0.1652	0.1757	0.3907	0.391	-0.0679	0.9251	0.993	5637.83	0.0273	14429	14429	100
agr	A2006257	MOD13Q1	250m_16_days_EVI	0.1579	0.1834	0.3571	0.342	-0.0622	0.9031	0.9653	5151.96	0.0249	14429	14429	100
agr	A2006273	MOD13Q1	250m_16_days_EVI	0.1524	0.2078	0.3107	0.2839	-0.0595	0.9106	0.9701	4482.14	0.0232	14429	14427	99.99
agr	A2006289	MOD13Q1	250m_16_days_EVI	0.1329	0.2512	0.2774	0.2554	-0.0628	0.8808	0.9436	4002.05	0.0177	14429	14429	100
agr	A2006305	MOD13Q1	250m_16_days_EVI	0.1287	0.1073	0.222	0.1845	-0.0358	0.7931	0.8289	3202.26	0.0166	14429	14427	99.99
agr	A2006321	MOD13Q1	250m_16_days_EVI	0.1194	0.0898	0.211	0.1823	-0.0343	0.7447	0.779	3043.82	0.0143	14429	14429	100
agr	A2006337	MOD13Q1	250m_16_days_EVI	0.1025	0.0893	0.1858	0.1654	-0.0231	0.7451	0.7682	2681.41	0.0105	14429	14429	100
agr	A2006353	MOD13Q1	250m_16_days_EVI	0.1084	0.1526	0.2079	0.1904	-0.0553	0.7504	0.8057	3000.26	0.0118	14429	14429	100
agr	A2007001	MOD13Q1	250m_16_days_EVI	0.1038	0.1805	0.2069	0.1883	-0.0526	0.7768	0.8294	2984.65	0.0108	14429	14429	100
agr	A2007017	MOD13Q1	250m_16_days_EVI	0.092	0.197	0.1868	0.1718	-0.0439	0.7019	0.7458	2696.06	0.0085	14429	14429	100
agr	A2007033	MOD13Q1	250m_16_days_EVI	0.1334	0.2193	0.2608	0.2421	-0.0507	0.9415	0.9922	3762.12	0.0178	14429	14428	99.99
agr	A2007049	MOD13Q1	250m_16_days_EVI	0.1593	0.2029	0.3448	0.3267	-0.0543	0.9533	1.0076	4974.75	0.0254	14429	14427	99.99
agr	A2007065	MOD13Q1	250m_16_days_EVI	0.1946	0.2083	0.4152	0.393	-0.0465	0.9657	1.0122	5990.35	0.0379	14429	14429	100
agr	A2007081	MOD13Q1	250m_16_days_EVI	0.1925	0.372	0.4017	0.3841	-0.049	0.9452	0.9942	5795.46	0.037	14429	14429	100
agr	A2007097	MOD13Q1	250m_16_days_EVI	0.1686	0.1314	0.3503	0.3318	-0.0477	0.9165	0.9642	5055.1	0.0284	14429	14429	100
agr	A2007113	MOD13Q1	250m_16_days_EVI	0.18	0.1913	0.3598	0.3372	-0.0719	0.969	1.0409	5191.37	0.0324	14429	14429	100
agr	A2007129	MOD13Q1	250m_16_days_EVI	0.1755	0.1872	0.3398	0.3077	-0.0457	0.9816	1.0273	4903.09	0.0308	14429	14429	100
agr	A2007145	MOD13Q1	250m_16_days_EVI	0.1762	0.1645	0.3543	0.3279	-0.0869	0.9449	1.0318	5112.43	0.0311	14429	14429	100
agr	A2007161	MOD13Q1	250m_16_days_EVI	0.1813	0.3158	0.3836	0.3697	-0.0772	0.9547	1.0319	5534.92	0.0329	14429	14429	100
agr	A2007177	MOD13Q1	250m_16_days_EVI	0.1774	0.3961	0.3942	0.3863	-0.0824	0.997	1.0794	5685.07	0.0315	14429	14423	99.96
agr	A2007193	MOD13Q1	250m_16_days_EVI	0.1776	0.3014	0.4202	0.4294	-0.0878	0.9694	1.0572	6062.03	0.0315	14429	14426	99.98
agr	A2007209	MOD13Q1	250m_16_days_EVI	0.1729	0.51	0.4157	0.4296	-0.0818	0.9867	1.0685	5998.57	0.0299	14429	14429	100
agr	A2007225	MOD13Q1	250m_16_days_EVI	0.1674	0.3538	0.3983	0.4048	-0.0542	0.9507	1.0049	5746.62	0.028	14429	14429	100
agr	A2007241	MOD13Q1	250m_16_days_EVI	0.1662	0.2096	0.3732	0.3653	-0.059	0.9343	0.9933	5385.17	0.0276	14429	14429	100
agr	A2007257	MOD13Q1	250m_16_days_EVI	0.1669	0.1608	0.3403	0.3182	-0.0693	0.9548	1.0241	4910.53	0.0279	14429	14429	100
agr	A2007273	MOD13Q1	250m_16_days_EVI	0.1685	0.2517	0.33	0.3034	-0.0501	0.8818	0.9319	4762.1	0.0284	14429	14429	100
agr	A2007289	MOD13Q1	250m_16_days_EVI	0.1662	0.1651	0.296	0.253	-0.0489	0.9457	0.9946	4270.98	0.0276	14429	14429	100
agr	A2007305	MOD13Q1	250m_16_days_EVI	0.1385	0.2757	0.2595	0.227	-0.0487	0.8698	0.9185	3744.64	0.0192	14429	14429	100
agr	A2007321	MOD13Q1	250m_16_days_EVI	0.1341	0.1208	0.2557	0.2258	-0.0485	0.8839	0.9324	3689.68	0.018	14429	14429	100
agr	A2007337	MOD13Q1	250m_16_days_EVI	0.1139	0.0831	0.2153	0.1924	-0.0506	0.7387	0.7893	3106.31	0.013	14429	14429	100
agr	A2007353	MOD13Q1	250m_16_days_EVI	0.1113	0.0646	0.1992	0.181	-0.0346	0.7855	0.8201	2873.17	0.0124	14429	14426	99.98
agr	A2008001	MOD13Q1	250m_16_days_EVI	0.1098	0.1059	0.2056	0.1877	-0.0693	0.83	0.8993	2966.07	0.0121	14429	14428	99.99
agr	A2008017	MOD13Q1	250m_16_days_EVI	0.1162	0.1596	0.2161	0.1969	-0.0522	0.9544	1.0066	3115.93	0.0135	14429	14418	99.92
agr	A2008033	MOD13Q1	250m_16_days_EVI	0.1297	0.2564	0.2787	0.2653	-0.0662	0.852	0.9182	4021.8	0.0168	14429	14429	100
agr	A2008049	MOD13Q1	250m_16_days_EVI	0.1646	0.3313	0.3948	0.3932	-0.0628	0.9399	1.0027	5696.15	0.0271	14429	14428	99.99
agr	A2008065	MOD13Q1	250m_16_days_EVI	0.1715	0.5455	0.4405	0.4485	-0.0441	0.9637	1.0078	6356.07	0.0294	14429	14429	100
agr	A2008081	MOD13Q1	250m_16_days_EVI	0.1862	0.3172	0.4493	0.4592	-0.0446	0.9316	0.9762	6482.16	0.0347	14429	14428	99.99
agr	A2008097	MOD13Q1	250m_16_days_EVI	0.1722	0.1335	0.3986	0.398	-0.05	0.9319	0.9819	5750.82	0.0296	14429	14429	100
agr	A2008113	MOD13Q1	250m_16_days_EVI	0.1686	0.3269	0.378	0.3699	-0.0526	0.9986	1.0512	5453.61	0.0284	14429	14429	100
agr	A2008129	MOD13Q1	250m_16_days_EVI	0.164	0.3802	0.3467	0.3161	-0.0294	0.9404	0.9698	5002.05	0.0269	14429	14429	100
agr	A2008145	MOD13Q1	250m_16_days_EVI	0.1646	0.178	0.3475	0.319	-0.0913	0.9487	1.04	5012.43	0.0271	14429	14426	99.98
agr	A2008161	MOD13Q1	250m_16_days_EVI	0.1746	0.199	0.38	0.3594	-0.0957	0.9964	1.0921	5481.97	0.0305	14429	14426	99.98
agr	A2008177	MOD13Q1	250m_16_days_EVI	0.1635	0.3149	0.3824	0.3672	-0.0892	0.9713	1.0605	5517.77	0.0267	14429	14429	100
agr	A2008193	MOD13Q1	250m_16_days_EVI	0.1747	0.4829	0.4191	0.4175	-0.0652	0.9884	1.0536	6047.41	0.0305	14429	14429	100
agr	A2008209	MOD13Q1	250m_16_days_EVI	0.1811	0.5765	0.4361	0.4454	-0.0895	0.994	1.0835	6292.93	0.0328	14429	14429	100
agr	A2008225	MOD13Q1	250m_16_days_EVI	0.1703	0.4923	0.4157	0.4237	-0.0789	0.9278	1.0067	5998.36	0.029	14429	14429	100
agr	A2008241	MOD13Q1	250m_16_days_EVI	0.1614	0.1685	0.3869	0.3838	-0.0516	0.8899	0.9415	5582.51	0.026	14429	14429	100
agr	A2008257	MOD13Q1	250m_16_days_EVI	0.1616	0.329	0.3514	0.3265	-0.0516	0.9045	0.9561	5070.23	0.0261	14429	14429	100
agr	A2008273	MOD13Q1	250m_16_days_EVI	0.1633	0.1591	0.33	0.3004	-0.0682	0.9229	0.9911	4761.9	0.0267	14429	14429	100
agr	A2008289	MOD13Q1	250m_16_days_EVI	0.1432	0.1997	0.2966	0.2719	-0.0738	0.837	0.9108	4279.95	0.0205	14429	14429	100
agr	A2008305	MOD13Q1	250m_16_days_EVI	0.1499	0.2045	0.2724	0.2373	-0.0471	0.8314	0.8785	3923.68	0.0225	14429	14406	99.84
agr	A2008321	MOD13Q1	250m_16_days_EVI	0.1362	0.1444	0.2419	0.2118	-0.0468	0.7896	0.8364	3490.16	0.0186	14429	14429	100
agr	A2008337	MOD13Q1	250m_16_days_EVI	0.1209	0.1153	0.2186	0.1975	-0.0521	0.778	0.8301	3153.54	0.0146	14429	14423	99.96
agr	A2008353	MOD13Q1	250m_16_days_EVI	0.1045	0.0811	0.2005	0.1818	-0.0319	0.7662	0.7981	2892.62	0.0109	14429	14429	100
agr	A2009001	MOD13Q1	250m_16_days_EVI	0.1009	0.0926	0.2012	0.1838	-0.0433	0.8097	0.853	2903.06	0.0102	14429	14429	100
agr	A2009017	MOD13Q1	250m_16_days_EVI	0.1145	0.1867	0.2376	0.22	-0.0331	0.8647	0.8978	3428.71	0.0131	14429	14429	100
agr	A2009033	MOD13Q1	250m_16_days_EVI	0.1327	0.1577	0.268	0.2504	-0.0222	0.8709	0.8931	3867.63	0.0176	14429	14429	100
agr	A2009049	MOD13Q1	250m_16_days_EVI	0.1688	0.3034	0.3374	0.325	-0.0462	0.9827	1.0289	4865.93	0.0285	14429	14421	99.94
agr	A2009065	MOD13Q1	250m_16_days_EVI	0.1675	0.4248	0.4316	0.433	-0.0626	0.9407	1.0033	6226.86	0.0281	14429	14429	100
agr	A2009081	MOD13Q1	250m_16_days_EVI	0.1727	0.5802	0.453	0.4518	-0.0488	0.9432	0.992	6536.96	0.0298	14429	14429	100
agr	A2009097	MOD13Q1	250m_16_days_EVI	0.1758	0.2568	0.402	0.4008	-0.0377	0.9751	1.0128	5801.16	0.0309	14429	14429	100
agr	A2009113	MOD13Q1	250m_16_days_EVI	0.1669	0.1917	0.3714	0.3609	-0.0454	0.9144	0.9598	5358.64	0.0278	14429	14429	100
agr	A2009129	MOD13Q1	250m_16_days_EVI	0.1652	0.2634	0.3363	0.3134	-0.0579	0.9665	1.0244	4852.81	0.0273	14429	14429	100
agr	A2009145	MOD13Q1	250m_16_days_EVI	0.1591	0.1945	0.3236	0.2978	-0.0847	0.9879	1.0726	4667.6	0.0253	14429	14422	99.95
agr	A2009161	MOD13Q1	250m_16_days_EVI	0.1712	0.2686	0.3633	0.3516	-0.0841	0.9394	1.0235	5242.76	0.0293	14429	14429	100
agr	A2009177	MOD13Q1	250m_16_days_EVI	0.1703	0.4293	0.3885	0.3898	-0.0753	0.985	1.0603	5605.38	0.029	14429	14429	100
agr	A2009193	MOD13Q1	250m_16_days_EVI	0.1723	0.5406	0.4069	0.4181	-0.0861	0.9248	1.0109	5870.74	0.0297	14429	14429	100
agr	A2009209	MOD13Q1	250m_16_days_EVI	0.1675	0.3041	0.4077	0.4229	-0.0585	0.9272	0.9857	5882.15	0.0281	14429	14429	100
agr	A2009225	MOD13Q1	250m_16_days_EVI	0.1655	0.4122	0.3962	0.4026	-0.0658	0.9249	0.9907	5716.51	0.0274	14429	14429	100
agr	A2009241	MOD13Q1	250m_16_days_EVI	0.1525	0.3192	0.3642	0.3656	-0.0665	0.9244	0.9909	5255.12	0.0233	14429	14429	100
agr	A2009257	MOD13Q1	250m_16_days_EVI	0.16	0.3489	0.3519	0.3389	-0.0087	0.9519	0.9606	5077.22	0.0256	14429	14429	100
agr	A2009273	MOD13Q1	250m_16_days_EVI	0.1462	0.2144	0.2871	0.2634	-0.0476	0.8627	0.9103	4142.64	0.0214	14429	14429	100
agr	A2009289	MOD13Q1	250m_16_days_EVI	0.1546	0.2903	0.3188	0.2903	-0.0433	0.8352	0.8785	4599.36	0.0239	14429	14429	100
agr	A2009305	MOD13Q1	250m_16_days_EVI	0.1416	0.305	0.2876	0.2638	-0.0336	0.8404	0.874	4149.5	0.02	14429	14429	100
agr	A2009321	MOD13Q1	250m_16_days_EVI	0.1201	0.2086	0.2573	0.2426	-0.0394	0.8455	0.8849	3711.88	0.0144	14429	14429	100
agr	A2009337	MOD13Q1	250m_16_days_EVI	0.1005	0.0805	0.1982	0.1873	-0.0357	0.8859	0.9216	2858.59	0.0101	14429	14424	99.97
agr	A2009353	MOD13Q1	250m_16_days_EVI	0.1038	0.1087	0.2025	0.1876	-0.0452	0.8324	0.8776	2920.66	0.0108	14429	14425	99.97
agr	A2010001	MOD13Q1	250m_16_days_EVI	0.1279	0.1872	0.2584	0.2339	-0.0387	0.8929	0.9316	3720.49	0.0164	14429	14396	99.77
agr	A2010017	MOD13Q1	250m_16_days_EVI	0.1465	0.2512	0.2975	0.2734	-0.0848	0.917	1.0018	4287.21	0.0214	14429	14411	99.88
agr	A2010033	MOD13Q1	250m_16_days_EVI	0.1564	0.1967	0.3911	0.3806	-0.057	0.9112	0.9682	5643.21	0.0245	14429	14429	100
agr	A2010049	MOD13Q1	250m_16_days_EVI	0.1802	0.3871	0.4052	0.3995	-0.0351	0.9997	1.0348	5089.96	0.0325	14429	12562	87.06
agr	A2010065	MOD13Q1	250m_16_days_EVI	0.1704	0.3624	0.4445	0.4534	-0.0438	0.9849	1.0287	6413.25	0.029	14429	14428	99.99
agr	A2010081	MOD13Q1	250m_16_days_EVI	0.1701	0.6732	0.4417	0.4515	-0.0128	0.9447	0.9575	6373.05	0.0289	14429	14429	100
agr	A2010097	MOD13Q1	250m_16_days_EVI	0.1752	0.4378	0.4417	0.4613	-0.0252	0.9182	0.9434	6371.77	0.0307	14429	14427	99.99
agr	A2010113	MOD13Q1	250m_16_days_EVI	0.173	0.434	0.4164	0.4242	-0.061	0.9262	0.9872	6008.82	0.0299	14429	14429	100
agr	A2010129	MOD13Q1	250m_16_days_EVI	0.1633	0.2226	0.3601	0.3511	-0.0775	0.9748	1.0523	5195.74	0.0267	14429	14429	100
agr	A2010145	MOD13Q1	250m_16_days_EVI	0.1723	0.2624	0.3541	0.3232	-0.0643	0.9698	1.0341	5109.1	0.0297	14429	14429	100
agr	A2010161	MOD13Q1	250m_16_days_EVI	0.1489	0.2912	0.3404	0.3227	-0.0792	0.9201	0.9993	4911.74	0.0222	14429	14429	100
agr	A2010177	MOD13Q1	250m_16_days_EVI	0.144	0.4882	0.4142	0.4124	0.0409	0.9033	0.8624	5976.86	0.0207	14429	14429	100
agr	A2010193	MOD13Q1	250m_16_days_EVI	0.1632	0.4865	0.3989	0.4047	-0.0978	0.9233	1.0211	5755.27	0.0266	14429	14429	100
agr	A2010209	MOD13Q1	250m_16_days_EVI	0.1673	0.5319	0.4077	0.4206	-0.0778	0.9718	1.0496	5882.59	0.028	14429	14429	100
agr	A2010225	MOD13Q1	250m_16_days_EVI	0.1668	0.1702	0.4011	0.4155	-0.061	0.9332	0.9942	5788.07	0.0278	14429	14429	100
agr	A2010241	MOD13Q1	250m_16_days_EVI	0.161	0.5125	0.3829	0.3873	-0.0428	0.9147	0.9575	5524.15	0.0259	14429	14429	100
agr	A2010257	MOD13Q1	250m_16_days_EVI	0.1508	0.3714	0.3482	0.3418	-0.041	0.8982	0.9392	5023.87	0.0227	14429	14429	100
agr	A2010273	MOD13Q1	250m_16_days_EVI	0.1519	0.1673	0.314	0.288	-0.0406	0.9109	0.9515	4531.03	0.0231	14429	14429	100
agr	A2010289	MOD13Q1	250m_16_days_EVI	0.1412	0.1449	0.2566	0.226	-0.0534	0.8378	0.8912	3700.16	0.0199	14429	14421	99.94
agr	A2010305	MOD13Q1	250m_16_days_EVI	0.1476	0.1091	0.2544	0.2151	-0.0419	0.9164	0.9583	3670.05	0.0218	14429	14429	100
agr	A2010321	MOD13Q1	250m_16_days_EVI	0.1278	0.1115	0.2241	0.1934	-0.0401	0.7671	0.8072	3233.66	0.0163	14429	14429	100
agr	A2010337	MOD13Q1	250m_16_days_EVI	0.1102	0.1556	0.2231	0.2061	-0.0565	0.7131	0.7696	3192.88	0.0121	14429	14311	99.18
agr	A2010353	MOD13Q1	250m_16_days_EVI	0.1155	0.1438	0.2286	0.2077	-0.0372	0.8021	0.8393	3297.6	0.0133	14429	14425	99.97
agr	A2011001	MOD13Q1	250m_16_days_EVI	0.116	0.3002	0.267	0.2474	-0.0674	0.8121	0.8795	3427.93	0.0135	14429	12837	88.97
agr	A2011017	MOD13Q1	250m_16_days_EVI	0.138	0.2206	0.2866	0.2656	-0.028	0.8755	0.9035	4135.71	0.019	14429	14429	100
agr	A2011033	MOD13Q1	250m_16_days_EVI	0.1423	0.222	0.3437	0.3257	-0.0321	0.8686	0.9007	4958.76	0.0202	14429	14429	100
agr	A2011049	MOD13Q1	250m_16_days_EVI	0.1678	0.4273	0.3743	0.3609	-0.0516	0.9743	1.0259	5400.39	0.0282	14429	14429	100
agr	A2011065	MOD13Q1	250m_16_days_EVI	0.1796	0.4618	0.3748	0.3595	-0.0332	0.9513	0.9845	5408.58	0.0323	14429	14429	100
agr	A2011081	MOD13Q1	250m_16_days_EVI	0.1712	0.4727	0.4701	0.4793	-0.0716	0.9682	1.0398	6783.78	0.0293	14429	14429	100
agr	A2011097	MOD13Q1	250m_16_days_EVI	0.1713	0.4525	0.4448	0.4535	-0.0382	0.9857	1.0239	6415.2	0.0294	14429	14423	99.96
agr	A2011113	MOD13Q1	250m_16_days_EVI	0.1547	0.6005	0.3898	0.3961	-0.0069	0.9521	0.959	5624.16	0.0239	14429	14429	100
agr	A2011129	MOD13Q1	250m_16_days_EVI	0.1549	0.1601	0.3468	0.339	-0.0316	0.9205	0.9521	5004.56	0.024	14429	14429	100
agr	A2011145	MOD13Q1	250m_16_days_EVI	0.1555	0.2052	0.3203	0.2939	-0.0428	0.9902	1.033	4620.94	0.0242	14429	14429	100
agr	A2011161	MOD13Q1	250m_16_days_EVI	0.1672	0.1523	0.3493	0.3258	-0.0561	0.9463	1.0024	5040.58	0.028	14429	14429	100
agr	A2011177	MOD13Q1	250m_16_days_EVI	0.166	0.3289	0.3752	0.369	-0.0538	0.8934	0.9472	5413.3	0.0275	14429	14429	100
agr	A2011193	MOD13Q1	250m_16_days_EVI	0.1636	0.578	0.3947	0.4041	-0.0668	0.9556	1.0224	5695.28	0.0268	14429	14429	100
agr	A2011209	MOD13Q1	250m_16_days_EVI	0.167	0.3136	0.4098	0.4255	-0.066	0.9172	0.9832	5912.72	0.0279	14429	14429	100
agr	A2011225	MOD13Q1	250m_16_days_EVI	0.1651	0.4635	0.402	0.4185	-0.0663	0.8946	0.9609	5800.79	0.0272	14429	14429	100
agr	A2011241	MOD13Q1	250m_16_days_EVI	0.1583	0.5569	0.3887	0.3979	-0.0356	0.8533	0.8889	5608.12	0.0251	14429	14429	100
agr	A2011257	MOD13Q1	250m_16_days_EVI	0.1496	0.4026	0.351	0.3463	-0.0368	0.9228	0.9596	5065.22	0.0224	14429	14429	100
agr	A2011273	MOD13Q1	250m_16_days_EVI	0.1532	0.1859	0.3178	0.2969	-0.0236	0.8339	0.8575	4586.02	0.0235	14429	14429	100
agr	A2011289	MOD13Q1	250m_16_days_EVI	0.1469	0.1694	0.2897	0.2577	-0.0277	0.886	0.9137	4179.72	0.0216	14429	14429	100
agr	A2011305	MOD13Q1	250m_16_days_EVI	0.1255	0.1332	0.2445	0.2155	-0.0471	0.86	0.9071	3527.91	0.0157	14429	14427	99.99
agr	A2011321	MOD13Q1	250m_16_days_EVI	0.1089	0.1506	0.2122	0.1878	-0.0385	0.7097	0.7482	3061.94	0.0118	14429	14429	100
agr	A2011337	MOD13Q1	250m_16_days_EVI	0.0964	0.1253	0.192	0.1699	-0.0429	0.6629	0.7058	2770.49	0.0093	14429	14429	100
agr	A2011353	MOD13Q1	250m_16_days_EVI	0.0812	0.0891	0.1649	0.1493	-0.0375	0.676	0.7135	2379.61	0.0066	14429	14429	100
agr	A2012001	MOD13Q1	250m_16_days_EVI	0.0779	0.1697	0.1617	0.1475	-0.0491	0.6711	0.7202	2332	0.0061	14429	14426	99.98
agr	A2012017	MOD13Q1	250m_16_days_EVI	0.0859	0.0977	0.1696	0.1523	-0.0549	0.7603	0.8152	2447.2	0.0074	14429	14429	100
agr	A2012033	MOD13Q1	250m_16_days_EVI	0.1241	0.1858	0.2327	0.2057	-0.0423	0.8432	0.8855	3357.66	0.0154	14429	14429	100
agr	A2012049	MOD13Q1	250m_16_days_EVI	0.1518	0.1382	0.2832	0.2496	-0.041	0.8615	0.9025	4085.81	0.023	14429	14429	100
agr	A2012065	MOD13Q1	250m_16_days_EVI	0.1684	0.1883	0.3208	0.2909	-0.0279	0.928	0.9559	4626.4	0.0283	14429	14420	99.94
agr	A2012081	MOD13Q1	250m_16_days_EVI	0.1744	0.2074	0.3662	0.3557	-0.0431	0.9597	1.0028	5283.59	0.0304	14429	14429	100
agr	A2012097	MOD13Q1	250m_16_days_EVI	0.1856	0.4409	0.4127	0.4153	-0.0563	0.9899	1.0462	5951.64	0.0344	14429	14420	99.94
agr	A2012113	MOD13Q1	250m_16_days_EVI	0.1686	0.5079	0.3952	0.4018	-0.0343	0.8902	0.9245	5702.39	0.0284	14429	14429	100
agr	A2012129	MOD13Q1	250m_16_days_EVI	0.1699	0.4822	0.3718	0.3581	-0.0622	0.9274	0.9896	5364.29	0.0289	14429	14429	100
agr	A2012145	MOD13Q1	250m_16_days_EVI	0.1625	0.228	0.3355	0.3108	-0.0648	0.9295	0.9943	4839.81	0.0264	14429	14427	99.99
agr	A2012161	MOD13Q1	250m_16_days_EVI	0.1704	0.1477	0.3542	0.3335	-0.0731	0.9905	1.0636	5110.59	0.029	14429	14429	100
agr	A2012177	MOD13Q1	250m_16_days_EVI	0.1672	0.3521	0.3804	0.373	-0.0733	0.9311	1.0044	5488.15	0.028	14429	14429	100
agr	A2012193	MOD13Q1	250m_16_days_EVI	0.1725	0.5624	0.4077	0.4121	-0.0586	0.9459	1.0045	5882.19	0.0298	14429	14429	100
agr	A2012209	MOD13Q1	250m_16_days_EVI	0.1696	0.4947	0.4088	0.4205	-0.0533	0.9478	1.0011	5899.22	0.0288	14429	14429	100
agr	A2012225	MOD13Q1	250m_16_days_EVI	0.1688	0.4789	0.4055	0.4169	-0.0568	0.9083	0.9651	5850.77	0.0285	14429	14429	100
agr	A2012241	MOD13Q1	250m_16_days_EVI	0.1593	0.4776	0.3748	0.3754	-0.045	0.8792	0.9242	5408.64	0.0254	14429	14429	100
agr	A2012257	MOD13Q1	250m_16_days_EVI	0.16	0.5	0.3545	0.3386	-0.0276	0.985	1.0126	5115.59	0.0256	14429	14429	100
agr	A2012273	MOD13Q1	250m_16_days_EVI	0.1572	0.2235	0.3179	0.2858	-0.0372	0.8643	0.9015	4586.78	0.0247	14429	14429	100
agr	A2012289	MOD13Q1	250m_16_days_EVI	0.155	0.1523	0.2929	0.2577	-0.0358	0.9834	1.0192	4226.77	0.024	14429	14429	100
agr	A2012305	MOD13Q1	250m_16_days_EVI	0.1476	0.1603	0.2633	0.2258	-0.0491	0.8097	0.8588	3799.66	0.0218	14429	14429	100
agr	A2012321	MOD13Q1	250m_16_days_EVI	0.1257	0.1435	0.2335	0.2073	-0.0274	0.7382	0.7656	3369.65	0.0158	14429	14429	100
agr	A2012337	MOD13Q1	250m_16_days_EVI	0.1257	0.0948	0.2339	0.2119	-0.0814	0.7549	0.8363	3372.51	0.0158	14429	14419	99.93
agr	A2012353	MOD13Q1	250m_16_days_EVI	0.1142	0.1987	0.2374	0.2243	-0.0724	0.8331	0.9055	3425.39	0.013	14429	14428	99.99
agr	A2013001	MOD13Q1	250m_16_days_EVI	0.1153	0.223	0.2577	0.2437	-0.0453	0.8331	0.8784	3718.34	0.0133	14429	14429	100
agr	A2013017	MOD13Q1	250m_16_days_EVI	0.1274	0.2489	0.2924	0.2773	-0.0355	0.84	0.8755	4219.34	0.0162	14429	14429	100
agr	A2013033	MOD13Q1	250m_16_days_EVI	0.1432	0.3213	0.336	0.3254	-0.0407	0.8599	0.9006	4847.28	0.0205	14429	14425	99.97
agr	A2013049	MOD13Q1	250m_16_days_EVI	0.1591	0.3047	0.3822	0.3799	-0.0401	0.9657	1.0058	5515.42	0.0253	14429	14429	100
agr	A2013065	MOD13Q1	250m_16_days_EVI	0.1792	0.5139	0.4305	0.4376	-0.0319	0.9191	0.951	6211.15	0.0321	14429	14429	100
agr	A2013081	MOD13Q1	250m_16_days_EVI	0.1808	0.4235	0.4267	0.4271	-0.0317	0.9722	1.0039	6156.13	0.0327	14429	14429	100
agr	A2013097	MOD13Q1	250m_16_days_EVI	0.172	0.4615	0.4287	0.4273	-0.0686	0.9497	1.0183	6185.95	0.0296	14429	14429	100
agr	A2013113	MOD13Q1	250m_16_days_EVI	0.1475	0.2032	0.3493	0.3363	-0.0741	0.8675	0.9416	5039.36	0.0217	14429	14429	100
agr	A2013129	MOD13Q1	250m_16_days_EVI	0.1565	0.1915	0.3449	0.326	-0.0624	0.9394	1.0018	4976.18	0.0245	14429	14429	100
agr	A2013145	MOD13Q1	250m_16_days_EVI	0.1524	0.1888	0.335	0.3133	-0.0789	0.8901	0.969	4833.06	0.0232	14429	14429	100
agr	A2013161	MOD13Q1	250m_16_days_EVI	0.1655	0.1563	0.354	0.3354	-0.0907	0.9728	1.0635	5107.59	0.0274	14429	14429	100
agr	A2013177	MOD13Q1	250m_16_days_EVI	0.1684	0.5303	0.3829	0.3827	-0.0736	0.987	1.0606	5524.19	0.0284	14429	14429	100
agr	A2013193	MOD13Q1	250m_16_days_EVI	0.1632	0.506	0.3951	0.4076	-0.0675	0.9561	1.0236	5700.23	0.0266	14429	14429	100
agr	A2013241	MOD13Q1	250m_16_days_EVI	0.1603	0.4412	0.3638	0.3578	-0.0366	0.9012	0.9378	5248.96	0.0257	14429	14429	100
agr	A2013257	MOD13Q1	250m_16_days_EVI	0.1574	0.2334	0.3397	0.324	-0.0464	0.8722	0.9186	4901.08	0.0248	14429	14429	100
agr	A2013273	MOD13Q1	250m_16_days_EVI	0.1479	0.1276	0.3019	0.2775	-0.043	0.8362	0.8792	4356.82	0.0219	14429	14429	100
agr	A2013289	MOD13Q1	250m_16_days_EVI	0.1393	0.1306	0.2675	0.2391	-0.0378	0.8226	0.8604	3859.85	0.0194	14429	14429	100
agr	A2013305	MOD13Q1	250m_16_days_EVI	0.1304	0.2569	0.2373	0.2013	-0.0371	0.8302	0.8673	3420.33	0.017	14429	14412	99.88
agr	A2013321	MOD13Q1	250m_16_days_EVI	0.1156	0.1175	0.2073	0.1751	-0.0565	0.7342	0.7907	2981.01	0.0134	14429	14382	99.67
agr	A2013337	MOD13Q1	250m_16_days_EVI	0.1037	0.1412	0.2051	0.1801	-0.0515	0.7681	0.8196	2956.59	0.0107	14429	14416	99.91
agr	A2013353	MOD13Q1	250m_16_days_EVI	0.0746	0.1557	0.1725	0.1633	-0.0528	0.7362	0.789	2489.58	0.0056	14429	14429	100
agr	A2014001	MOD13Q1	250m_16_days_EVI	0.0745	0.1621	0.1702	0.1608	-0.0419	0.6808	0.7227	2455.92	0.0055	14429	14429	100
agr	A2014017	MOD13Q1	250m_16_days_EVI	0.0916	0.1776	0.1849	0.166	-0.0464	0.7613	0.8077	2667.88	0.0084	14429	14426	99.98
agr	A2014033	MOD13Q1	250m_16_days_EVI	0.1184	0.136	0.1937	0.1663	-0.0383	0.8602	0.8985	2794.6	0.014	14429	14429	100
nat	A2000049	MOD13Q1	250m_16_days_EVI	0.0885	0.3256	0.2958	0.2884	-0.0444	0.8332	0.8776	3009.81	0.0078	10176	10176	100
nat	A2000065	MOD13Q1	250m_16_days_EVI	0.0929	0.3559	0.3684	0.3611	-0.0526	0.9133	0.9659	3749.29	0.0086	10176	10176	100
nat	A2000081	MOD13Q1	250m_16_days_EVI	0.0924	0.433	0.4363	0.431	-0.0254	0.9547	0.9801	4439.61	0.0085	10176	10176	100
nat	A2000097	MOD13Q1	250m_16_days_EVI	0.0863	0.4069	0.4269	0.4273	0.0349	0.8497	0.8148	4343.69	0.0074	10176	10174	99.98
nat	A2000113	MOD13Q1	250m_16_days_EVI	0.0873	0.4347	0.4182	0.428	0.0369	0.8825	0.8456	4255.65	0.0076	10176	10176	100
nat	A2000129	MOD13Q1	250m_16_days_EVI	0.086	0.3688	0.3023	0.3061	-0.0673	0.9521	1.0194	3076.51	0.0074	10176	10176	100
nat	A2000145	MOD13Q1	250m_16_days_EVI	0.0849	0.2114	0.2413	0.2298	-0.0065	0.863	0.8695	2454.89	0.0072	10176	10175	99.99
nat	A2000161	MOD13Q1	250m_16_days_EVI	0.0815	0.1626	0.1961	0.1759	-0.0397	0.8893	0.929	1995.32	0.0067	10176	10176	100
nat	A2000177	MOD13Q1	250m_16_days_EVI	0.0822	0.166	0.1829	0.1602	0.0247	0.8062	0.7815	1860.87	0.0068	10176	10176	100
nat	A2000193	MOD13Q1	250m_16_days_EVI	0.0847	0.1516	0.1794	0.1556	-0.0946	0.9575	1.0521	1825.82	0.0072	10176	10176	100
nat	A2000209	MOD13Q1	250m_16_days_EVI	0.0751	0.1505	0.1765	0.1566	0.0239	0.8166	0.7927	1795.05	0.0056	10176	10173	99.97
nat	A2000225	MOD13Q1	250m_16_days_EVI	0.0685	0.1446	0.1654	0.1482	0.0285	0.8043	0.7758	1682.78	0.0047	10176	10176	100
nat	A2000241	MOD13Q1	250m_16_days_EVI	0.0718	0.1451	0.1652	0.1466	-0.0011	0.8691	0.8702	1681.33	0.0051	10176	10176	100
nat	A2000257	MOD13Q1	250m_16_days_EVI	0.0681	0.1391	0.1638	0.1462	0.0315	0.7775	0.746	1666.99	0.0046	10176	10176	100
nat	A2000273	MOD13Q1	250m_16_days_EVI	0.067	0.1318	0.1507	0.1354	-0.0066	0.8186	0.8252	1533.69	0.0045	10176	10174	99.98
nat	A2000289	MOD13Q1	250m_16_days_EVI	0.0666	0.1274	0.1527	0.1353	-0.0119	0.796	0.8079	1553.99	0.0044	10176	10176	100
nat	A2000305	MOD13Q1	250m_16_days_EVI	0.0717	0.1887	0.2216	0.2084	0.0233	0.8354	0.8121	2255.18	0.0051	10176	10176	100
nat	A2000321	MOD13Q1	250m_16_days_EVI	0.0626	0.2225	0.2257	0.2178	-0.0177	0.6994	0.7171	2297.2	0.0039	10176	10176	100
nat	A2000337	MOD13Q1	250m_16_days_EVI	0.0706	0.2393	0.2473	0.2419	-0.0572	0.6874	0.7446	2516.16	0.005	10176	10173	99.97
nat	A2000353	MOD13Q1	250m_16_days_EVI	0.0685	0.2472	0.2719	0.267	-0.0341	0.7292	0.7633	2766.3	0.0047	10176	10175	99.99
nat	A2001001	MOD13Q1	250m_16_days_EVI	0.0681	0.2709	0.2678	0.2636	-0.0262	0.6895	0.7157	2724.77	0.0046	10176	10175	99.99
nat	A2001017	MOD13Q1	250m_16_days_EVI	0.0686	0.2843	0.2885	0.284	-0.0271	0.7088	0.7359	2935.28	0.0047	10176	10176	100
nat	A2001033	MOD13Q1	250m_16_days_EVI	0.0721	0.3195	0.3252	0.3211	-0.0019	0.8059	0.8078	3309.63	0.0052	10176	10176	100
nat	A2001049	MOD13Q1	250m_16_days_EVI	0.0849	0.3794	0.3597	0.3592	-0.0388	0.8542	0.893	3658.58	0.0072	10176	10172	99.96
nat	A2001065	MOD13Q1	250m_16_days_EVI	0.0809	0.4146	0.4225	0.4179	0.0475	0.8617	0.8142	4299.32	0.0066	10176	10176	100
nat	A2001081	MOD13Q1	250m_16_days_EVI	0.0767	0.3867	0.4215	0.4173	0.1098	0.8204	0.7106	4288.82	0.0059	10176	10176	100
nat	A2001097	MOD13Q1	250m_16_days_EVI	0.096	0.3769	0.3575	0.3705	-0.0497	0.8284	0.8781	3637.97	0.0092	10176	10176	100
nat	A2001113	MOD13Q1	250m_16_days_EVI	0.0821	0.2909	0.2988	0.3015	-0.0066	0.765	0.7716	3041.09	0.0067	10176	10176	100
nat	A2001129	MOD13Q1	250m_16_days_EVI	0.0674	0.1948	0.2208	0.2119	0.0359	0.7884	0.7525	2247.19	0.0045	10176	10176	100
nat	A2001145	MOD13Q1	250m_16_days_EVI	0.0684	0.1716	0.1927	0.1788	0.0275	0.8145	0.787	1961.3	0.0047	10176	10176	100
nat	A2001161	MOD13Q1	250m_16_days_EVI	0.0642	0.1675	0.1765	0.1631	-0.049	0.9283	0.9773	1795.72	0.0041	10176	10176	100
nat	A2001177	MOD13Q1	250m_16_days_EVI	0.0671	0.1527	0.172	0.1556	-0.0225	0.7819	0.8044	1750.41	0.0045	10176	10175	99.99
nat	A2001193	MOD13Q1	250m_16_days_EVI	0.0757	0.1403	0.1733	0.1526	-0.0777	0.8093	0.887	1763.01	0.0057	10176	10175	99.99
nat	A2001209	MOD13Q1	250m_16_days_EVI	0.0731	0.138	0.1667	0.1472	0.0552	0.8123	0.7571	1695.64	0.0054	10176	10173	99.97
nat	A2001225	MOD13Q1	250m_16_days_EVI	0.0723	0.138	0.1643	0.1447	0.0004	0.8322	0.8318	1671.61	0.0052	10176	10176	100
nat	A2001241	MOD13Q1	250m_16_days_EVI	0.0668	0.1398	0.1596	0.1422	-0.0168	0.79	0.8068	1623.8	0.0045	10176	10176	100
nat	A2001257	MOD13Q1	250m_16_days_EVI	0.0658	0.1333	0.1619	0.1447	0.0427	0.9122	0.8695	1647.97	0.0043	10176	10176	100
nat	A2001273	MOD13Q1	250m_16_days_EVI	0.0609	0.1348	0.156	0.14	0.0284	0.8072	0.7788	1587.19	0.0037	10176	10176	100
nat	A2001289	MOD13Q1	250m_16_days_EVI	0.0534	0.1401	0.152	0.1396	-0.0353	0.7249	0.7602	1546.75	0.0028	10176	10176	100
nat	A2001305	MOD13Q1	250m_16_days_EVI	0.0514	0.1341	0.1422	0.1299	-0.0549	0.7366	0.7915	1447.12	0.0026	10176	10175	99.99
nat	A2001321	MOD13Q1	250m_16_days_EVI	0.0559	0.1757	0.2059	0.199	-0.0268	0.5908	0.6176	2095.15	0.0031	10176	10176	100
nat	A2001337	MOD13Q1	250m_16_days_EVI	0.0627	0.2448	0.2545	0.2516	-0.0438	0.6369	0.6807	2589.88	0.0039	10176	10175	99.99
nat	A2001353	MOD13Q1	250m_16_days_EVI	0.1208	0.3991	0.4113	0.4302	0.0365	0.7694	0.7329	4066.89	0.0146	10176	9889	97.18
nat	A2002001	MOD13Q1	250m_16_days_EVI	0.0971	0.3637	0.3819	0.3842	-0.0224	0.8341	0.8565	3885.02	0.0094	10176	10174	99.98
nat	A2002017	MOD13Q1	250m_16_days_EVI	0.0891	0.3655	0.3753	0.3747	0.0281	0.8124	0.7843	3818.82	0.0079	10176	10176	100
nat	A2002033	MOD13Q1	250m_16_days_EVI	0.0983	0.448	0.4168	0.4178	-0.0359	0.8668	0.9027	4239.43	0.0097	10176	10172	99.96
nat	A2002049	MOD13Q1	250m_16_days_EVI	0.1057	0.5304	0.4947	0.497	0.0503	0.9251	0.8748	5034.5	0.0112	10176	10176	100
nat	A2002065	MOD13Q1	250m_16_days_EVI	0.1017	0.5361	0.5181	0.5238	-0.0173	0.8617	0.879	5271.99	0.0103	10176	10176	100
nat	A2002081	MOD13Q1	250m_16_days_EVI	0.0889	0.5229	0.508	0.5146	0.0337	0.8402	0.8065	5169.84	0.0079	10176	10176	100
nat	A2002097	MOD13Q1	250m_16_days_EVI	0.0931	0.4923	0.4476	0.4585	0.0018	0.7915	0.7897	4552.3	0.0087	10176	10170	99.94
nat	A2002113	MOD13Q1	250m_16_days_EVI	0.0903	0.3558	0.3655	0.3674	0.089	0.9193	0.8303	3719.71	0.0081	10176	10176	100
nat	A2002129	MOD13Q1	250m_16_days_EVI	0.0757	0.2767	0.277	0.2692	0.0112	0.864	0.8528	2815.92	0.0057	10176	10165	99.89
nat	A2002145	MOD13Q1	250m_16_days_EVI	0.0754	0.1653	0.202	0.1817	-0.0099	0.8723	0.8822	2053.94	0.0057	10176	10170	99.94
nat	A2002161	MOD13Q1	250m_16_days_EVI	0.0725	0.1607	0.1858	0.1663	-0.0385	0.8447	0.8832	1890.39	0.0053	10176	10176	100
nat	A2002177	MOD13Q1	250m_16_days_EVI	0.0736	0.1442	0.1753	0.1549	0.0327	0.912	0.8793	1784.34	0.0054	10176	10176	100
nat	A2002193	MOD13Q1	250m_16_days_EVI	0.0713	0.148	0.1747	0.1555	0.0488	0.8767	0.8279	1777.7	0.0051	10176	10176	100
nat	A2002209	MOD13Q1	250m_16_days_EVI	0.068	0.1417	0.1699	0.1504	0.0072	0.8212	0.814	1726.62	0.0046	10176	10164	99.88
nat	A2002225	MOD13Q1	250m_16_days_EVI	0.0638	0.1477	0.1685	0.1516	0.0544	0.9618	0.9074	1714.18	0.0041	10176	10176	100
nat	A2002241	MOD13Q1	250m_16_days_EVI	0.067	0.1377	0.1663	0.1479	0.0614	0.7851	0.7237	1692.44	0.0045	10176	10174	99.98
nat	A2002257	MOD13Q1	250m_16_days_EVI	0.0651	0.1369	0.1628	0.1458	0.005	0.8919	0.8869	1656.93	0.0042	10176	10176	100
nat	A2002273	MOD13Q1	250m_16_days_EVI	0.0573	0.1321	0.1572	0.1427	-0.0461	0.7831	0.8292	1600.13	0.0033	10176	10176	100
nat	A2002289	MOD13Q1	250m_16_days_EVI	0.0521	0.145	0.1611	0.1498	0.0207	0.7446	0.7239	1639.61	0.0027	10176	10175	99.99
nat	A2002305	MOD13Q1	250m_16_days_EVI	0.0443	0.1421	0.1479	0.1408	-0.0172	0.7096	0.7268	1463.81	0.002	10176	9896	97.25
nat	A2002321	MOD13Q1	250m_16_days_EVI	0.0696	0.2918	0.2706	0.2689	0.0194	0.6249	0.6055	2753	0.0048	10176	10172	99.96
nat	A2002337	MOD13Q1	250m_16_days_EVI	0.0788	0.262	0.2874	0.2819	-0.0224	0.7283	0.7507	2924.51	0.0062	10176	10176	100
nat	A2002353	MOD13Q1	250m_16_days_EVI	0.0865	0.2905	0.3074	0.3047	-0.0532	0.8379	0.8911	3127	0.0075	10176	10172	99.96
nat	A2003001	MOD13Q1	250m_16_days_EVI	0.123	0.4173	0.3688	0.3513	-0.0358	0.821	0.8568	3752.73	0.0151	10176	10176	100
nat	A2003017	MOD13Q1	250m_16_days_EVI	0.0964	0.4321	0.4371	0.4378	-0.0511	0.8117	0.8628	4417.22	0.0093	10176	10105	99.3
nat	A2003033	MOD13Q1	250m_16_days_EVI	0.0916	0.4351	0.4374	0.433	0.0408	0.8385	0.7977	4451.12	0.0084	10176	10176	100
nat	A2003049	MOD13Q1	250m_16_days_EVI	0.0956	0.5319	0.5087	0.51	0.093	0.8787	0.7857	5173.56	0.0091	10176	10171	99.95
nat	A2003065	MOD13Q1	250m_16_days_EVI	0.0908	0.5383	0.5092	0.5127	0.0575	0.9226	0.8651	5181.2	0.0082	10176	10176	100
nat	A2003081	MOD13Q1	250m_16_days_EVI	0.0849	0.5143	0.5009	0.5087	0.0385	0.8588	0.8203	5097.65	0.0072	10176	10176	100
nat	A2003097	MOD13Q1	250m_16_days_EVI	0.1004	0.5119	0.4723	0.4856	0.0528	0.8735	0.8207	4805.86	0.0101	10176	10175	99.99
nat	A2003113	MOD13Q1	250m_16_days_EVI	0.0975	0.4388	0.378	0.3936	0.034	0.8742	0.8402	3846.79	0.0095	10176	10176	100
nat	A2003129	MOD13Q1	250m_16_days_EVI	0.0954	0.3876	0.3523	0.3667	0.0667	0.8348	0.7681	3582.01	0.0091	10176	10168	99.92
nat	A2003145	MOD13Q1	250m_16_days_EVI	0.0795	0.2213	0.2584	0.2526	-0.0181	0.8947	0.9128	2629.65	0.0063	10176	10176	100
nat	A2003161	MOD13Q1	250m_16_days_EVI	0.0661	0.1817	0.2005	0.1895	0.0636	0.8742	0.8106	2038.38	0.0044	10176	10165	99.89
nat	A2003177	MOD13Q1	250m_16_days_EVI	0.0716	0.166	0.1867	0.1728	-0.0068	0.9304	0.9372	1897.31	0.0051	10176	10164	99.88
nat	A2003193	MOD13Q1	250m_16_days_EVI	0.0693	0.1635	0.1833	0.1681	0.0397	0.9615	0.9218	1864.8	0.0048	10176	10176	100
nat	A2003209	MOD13Q1	250m_16_days_EVI	0.0667	0.167	0.1822	0.169	0.0474	0.9503	0.9029	1853.7	0.0045	10176	10174	99.98
nat	A2003225	MOD13Q1	250m_16_days_EVI	0.0644	0.1683	0.1812	0.1665	0.0608	0.8598	0.799	1843.54	0.0041	10176	10176	100
nat	A2003241	MOD13Q1	250m_16_days_EVI	0.0624	0.1511	0.1729	0.1577	-0.0208	0.9808	1.0016	1759	0.0039	10176	10176	100
nat	A2003257	MOD13Q1	250m_16_days_EVI	0.0599	0.1472	0.1659	0.1505	-0.0151	0.8483	0.8634	1687.4	0.0036	10176	10172	99.96
nat	A2003273	MOD13Q1	250m_16_days_EVI	0.0577	0.1445	0.1645	0.1516	0.0633	0.8446	0.7813	1673.46	0.0033	10176	10176	100
nat	A2003289	MOD13Q1	250m_16_days_EVI	0.0512	0.1469	0.1587	0.1465	0.0586	0.8291	0.7705	1614.71	0.0026	10176	10176	100
nat	A2003305	MOD13Q1	250m_16_days_EVI	0.0561	0.125	0.1693	0.1597	0.0084	0.6182	0.6098	1538.89	0.0031	10176	9092	89.35
nat	A2003321	MOD13Q1	250m_16_days_EVI	0.0637	0.1887	0.2025	0.1923	0.0094	0.7125	0.7031	2020.95	0.0041	10176	9978	98.05
nat	A2003337	MOD13Q1	250m_16_days_EVI	0.0861	0.2168	0.255	0.2442	0.0209	0.6512	0.6303	2595.1	0.0074	10176	10176	100
nat	A2003353	MOD13Q1	250m_16_days_EVI	0.0915	0.2189	0.2789	0.2684	0.0112	0.7247	0.7135	2838.47	0.0084	10176	10176	100
nat	A2004001	MOD13Q1	250m_16_days_EVI	0.0914	0.2494	0.2807	0.2703	0.009	0.7154	0.7064	2856.48	0.0084	10176	10175	99.99
nat	A2004017	MOD13Q1	250m_16_days_EVI	0.1035	0.3134	0.3616	0.3531	-0.0484	0.7973	0.8457	3679.37	0.0107	10176	10174	99.98
nat	A2004033	MOD13Q1	250m_16_days_EVI	0.0983	0.3862	0.3795	0.3734	-0.0182	0.8074	0.8256	3861.84	0.0097	10176	10176	100
nat	A2004049	MOD13Q1	250m_16_days_EVI	0.1114	0.5287	0.5065	0.5096	0.031	0.9176	0.8866	5146.57	0.0124	10176	10162	99.86
nat	A2004065	MOD13Q1	250m_16_days_EVI	0.0902	0.4574	0.4965	0.4962	0.0645	0.8898	0.8253	5052.1	0.0081	10176	10176	100
nat	A2004081	MOD13Q1	250m_16_days_EVI	0.0966	0.4718	0.4776	0.4858	-0.0371	0.8078	0.8449	4860.24	0.0093	10176	10176	100
nat	A2004097	MOD13Q1	250m_16_days_EVI	0.0935	0.4397	0.407	0.4196	-0.0357	0.779	0.8147	4139.51	0.0087	10176	10172	99.96
nat	A2004113	MOD13Q1	250m_16_days_EVI	0.0796	0.3631	0.3234	0.33	-0.0307	0.8255	0.8562	3290.92	0.0063	10176	10176	100
nat	A2004129	MOD13Q1	250m_16_days_EVI	0.0624	0.2204	0.2373	0.229	0.0276	0.9194	0.8918	2414.2	0.0039	10176	10174	99.98
nat	A2004145	MOD13Q1	250m_16_days_EVI	0.0649	0.1914	0.2091	0.1974	-0.0185	0.829	0.8475	2127.33	0.0042	10176	10176	100
nat	A2004161	MOD13Q1	250m_16_days_EVI	0.0642	0.1671	0.1887	0.1732	-0.0449	0.9271	0.972	1920.45	0.0041	10176	10176	100
nat	A2004177	MOD13Q1	250m_16_days_EVI	0.0639	0.1577	0.1815	0.1648	0.0584	0.8027	0.7443	1846.96	0.0041	10176	10176	100
nat	A2004193	MOD13Q1	250m_16_days_EVI	0.0659	0.1594	0.1764	0.1599	-0.0386	0.9534	0.992	1794.85	0.0043	10176	10176	100
nat	A2004209	MOD13Q1	250m_16_days_EVI	0.0639	0.1505	0.1751	0.159	-0.0008	0.8368	0.8376	1781.42	0.0041	10176	10174	99.98
nat	A2004225	MOD13Q1	250m_16_days_EVI	0.0614	0.1606	0.1753	0.161	0.0442	0.8778	0.8336	1784.32	0.0038	10176	10176	100
nat	A2004241	MOD13Q1	250m_16_days_EVI	0.057	0.154	0.1676	0.1534	0.0553	0.6992	0.6439	1705.32	0.0032	10176	10176	100
nat	A2004257	MOD13Q1	250m_16_days_EVI	0.0568	0.1405	0.1657	0.1522	0.0569	0.7566	0.6997	1686.01	0.0032	10176	10176	100
nat	A2004273	MOD13Q1	250m_16_days_EVI	0.0573	0.1393	0.1601	0.146	0.0379	0.7783	0.7404	1629.15	0.0033	10176	10176	100
nat	A2004289	MOD13Q1	250m_16_days_EVI	0.0639	0.1187	0.1691	0.1506	-0.0327	0.6519	0.6846	1716.52	0.0041	10176	10151	99.75
nat	A2004305	MOD13Q1	250m_16_days_EVI	0.06	0.3011	0.2779	0.28	0.0333	0.6383	0.605	2827.61	0.0036	10176	10176	100
nat	A2004321	MOD13Q1	250m_16_days_EVI	0.0774	0.357	0.3812	0.3836	-0.0318	0.6886	0.7204	3879.16	0.006	10176	10176	100
nat	A2004337	MOD13Q1	250m_16_days_EVI	0.0861	0.3505	0.3728	0.375	0.0285	0.7359	0.7074	3793.54	0.0074	10176	10176	100
nat	A2004353	MOD13Q1	250m_16_days_EVI	0.0939	0.4452	0.4091	0.4143	0.0078	0.7577	0.7499	4163.27	0.0088	10176	10176	100
nat	A2005001	MOD13Q1	250m_16_days_EVI	0.0994	0.4307	0.4022	0.4118	-0.018	0.8323	0.8503	4091.24	0.0099	10176	10173	99.97
nat	A2005017	MOD13Q1	250m_16_days_EVI	0.0923	0.4964	0.4562	0.4614	-0.0406	0.831	0.8716	4640.09	0.0085	10176	10172	99.96
nat	A2005033	MOD13Q1	250m_16_days_EVI	0.0915	0.4402	0.4475	0.4539	-0.0201	0.8208	0.8409	4553.33	0.0084	10176	10176	100
nat	A2005049	MOD13Q1	250m_16_days_EVI	0.1008	0.5824	0.5273	0.5356	0.0608	0.8849	0.8241	5364.8	0.0102	10176	10175	99.99
nat	A2005065	MOD13Q1	250m_16_days_EVI	0.0922	0.5467	0.5359	0.5459	-0.0224	0.8497	0.8721	5453.12	0.0085	10176	10176	100
nat	A2005081	MOD13Q1	250m_16_days_EVI	0.1007	0.5987	0.5525	0.5713	0.0537	0.8313	0.7776	5622.7	0.0101	10176	10176	100
nat	A2005097	MOD13Q1	250m_16_days_EVI	0.0881	0.534	0.5105	0.5229	-0.0119	0.8011	0.813	5195.35	0.0078	10176	10176	100
nat	A2005113	MOD13Q1	250m_16_days_EVI	0.0975	0.4502	0.4236	0.4383	-0.0288	0.7141	0.7429	4310.72	0.0095	10176	10176	100
nat	A2005129	MOD13Q1	250m_16_days_EVI	0.0927	0.3183	0.3294	0.3312	0.0504	0.7916	0.7412	3351.58	0.0086	10176	10176	100
nat	A2005145	MOD13Q1	250m_16_days_EVI	0.0727	0.2355	0.2524	0.2423	-0.0561	0.7788	0.8349	2567.24	0.0053	10176	10172	99.96
nat	A2005161	MOD13Q1	250m_16_days_EVI	0.0661	0.1857	0.1961	0.1841	0.0494	0.975	0.9256	1995.62	0.0044	10176	10176	100
nat	A2005177	MOD13Q1	250m_16_days_EVI	0.0669	0.1648	0.1809	0.1644	0.0077	0.9263	0.9186	1840.63	0.0045	10176	10174	99.98
nat	A2005193	MOD13Q1	250m_16_days_EVI	0.0678	0.1539	0.1761	0.159	0.0027	0.868	0.8653	1791.28	0.0046	10176	10174	99.98
nat	A2005209	MOD13Q1	250m_16_days_EVI	0.0652	0.1569	0.1714	0.1561	-0.0501	0.9301	0.9802	1743.98	0.0043	10176	10176	100
nat	A2005225	MOD13Q1	250m_16_days_EVI	0.0622	0.1614	0.1726	0.1587	0.0272	0.7631	0.7359	1756.37	0.0039	10176	10176	100
nat	A2005241	MOD13Q1	250m_16_days_EVI	0.0597	0.1595	0.1727	0.1605	-0.0103	0.8014	0.8117	1756.24	0.0036	10176	10172	99.96
nat	A2005257	MOD13Q1	250m_16_days_EVI	0.0571	0.1553	0.1667	0.1542	0.0432	0.8741	0.8309	1696.7	0.0033	10176	10176	100
nat	A2005273	MOD13Q1	250m_16_days_EVI	0.0567	0.1384	0.1615	0.1497	0.0457	0.7994	0.7537	1643.51	0.0032	10176	10174	99.98
nat	A2005289	MOD13Q1	250m_16_days_EVI	0.051	0.1595	0.163	0.1536	-0.0613	0.6863	0.7476	1658.67	0.0026	10176	10175	99.99
nat	A2005305	MOD13Q1	250m_16_days_EVI	0.052	0.1311	0.1454	0.1348	0.0045	0.6451	0.6406	1194.39	0.0027	10176	8216	80.74
nat	A2005321	MOD13Q1	250m_16_days_EVI	0.0486	0.1459	0.1465	0.1377	-0.0061	0.6654	0.6715	1290.5	0.0024	10176	8806	86.54
nat	A2005337	MOD13Q1	250m_16_days_EVI	0.0466	0.1325	0.1433	0.1356	-0.0392	0.6416	0.6808	1261.84	0.0022	10176	8808	86.56
nat	A2005353	MOD13Q1	250m_16_days_EVI	0.0641	0.1854	0.1955	0.1891	0.0218	0.4916	0.4698	1131.44	0.0041	10176	5787	56.87
nat	A2006001	MOD13Q1	250m_16_days_EVI	0.0676	0.2398	0.2401	0.2351	-0.042	0.6094	0.6514	2443.74	0.0046	10176	10176	100
nat	A2006017	MOD13Q1	250m_16_days_EVI	0.0722	0.2608	0.2646	0.2586	0.0095	0.6201	0.6106	2692.82	0.0052	10176	10176	100
nat	A2006033	MOD13Q1	250m_16_days_EVI	0.0949	0.3406	0.3593	0.3513	0.0432	0.7988	0.7556	3654.71	0.009	10176	10173	99.97
nat	A2006049	MOD13Q1	250m_16_days_EVI	0.097	0.3911	0.3894	0.3839	-0.0205	0.8416	0.8621	3961.84	0.0094	10176	10175	99.99
nat	A2006065	MOD13Q1	250m_16_days_EVI	0.1135	0.537	0.4519	0.4508	-0.0373	0.9388	0.9761	4598.35	0.0129	10176	10176	100
nat	A2006081	MOD13Q1	250m_16_days_EVI	0.1598	0.6047	0.499	0.5052	-0.0198	0.9976	1.0174	3924.92	0.0255	10176	7865	77.29
nat	A2006097	MOD13Q1	250m_16_days_EVI	0.0971	0.5005	0.4847	0.4888	-0.0572	0.8212	0.8784	4931.38	0.0094	10176	10175	99.99
nat	A2006113	MOD13Q1	250m_16_days_EVI	0.0852	0.513	0.4869	0.4936	0.0687	0.7967	0.728	4954.65	0.0073	10176	10176	100
nat	A2006129	MOD13Q1	250m_16_days_EVI	0.0968	0.4442	0.4166	0.4326	-0.0563	0.8395	0.8958	4239.75	0.0094	10176	10176	100
nat	A2006145	MOD13Q1	250m_16_days_EVI	0.077	0.2835	0.2649	0.2649	0.0585	0.8566	0.7981	2695.46	0.0059	10176	10176	100
nat	A2006161	MOD13Q1	250m_16_days_EVI	0.0687	0.1859	0.2045	0.1925	-0.0553	0.7962	0.8515	2080.61	0.0047	10176	10176	100
nat	A2006177	MOD13Q1	250m_16_days_EVI	0.0713	0.1635	0.1901	0.1746	-0.0256	0.9284	0.954	1934.57	0.0051	10176	10176	100
nat	A2006193	MOD13Q1	250m_16_days_EVI	0.0725	0.1614	0.1816	0.1682	0.0453	0.8097	0.7644	1847.98	0.0053	10176	10176	100
nat	A2006209	MOD13Q1	250m_16_days_EVI	0.0659	0.1638	0.1775	0.1653	-0.0634	0.8065	0.8699	1806.18	0.0043	10176	10176	100
nat	A2006225	MOD13Q1	250m_16_days_EVI	0.0618	0.1539	0.1747	0.1641	0.0163	0.7246	0.7083	1777.75	0.0038	10176	10176	100
nat	A2006241	MOD13Q1	250m_16_days_EVI	0.0592	0.1558	0.1735	0.1636	-0.0092	0.782	0.7912	1765.4	0.0035	10176	10174	99.98
nat	A2006257	MOD13Q1	250m_16_days_EVI	0.0554	0.1703	0.1718	0.1647	-0.0265	0.7044	0.7309	1748	0.0031	10176	10176	100
nat	A2006273	MOD13Q1	250m_16_days_EVI	0.0546	0.1651	0.1664	0.1589	0.0053	0.7528	0.7475	1693.31	0.003	10176	10176	100
nat	A2006289	MOD13Q1	250m_16_days_EVI	0.0504	0.1544	0.1592	0.1515	0.0406	0.6765	0.6359	1619.86	0.0025	10176	10176	100
nat	A2006305	MOD13Q1	250m_16_days_EVI	0.048	0.123	0.1341	0.1244	0.0094	0.584	0.5746	1343.55	0.0023	10176	10022	98.49
nat	A2006321	MOD13Q1	250m_16_days_EVI	0.0533	0.1654	0.1866	0.1803	0.0276	0.6412	0.6136	1899.32	0.0028	10176	10176	100
nat	A2006337	MOD13Q1	250m_16_days_EVI	0.0555	0.1714	0.1859	0.1787	0.0025	0.6583	0.6558	1891.17	0.0031	10176	10175	99.99
nat	A2006353	MOD13Q1	250m_16_days_EVI	0.0593	0.2028	0.2116	0.2055	-0.0388	0.5894	0.6282	2152.8	0.0035	10176	10176	100
nat	A2007001	MOD13Q1	250m_16_days_EVI	0.0593	0.2077	0.222	0.2162	-0.0167	0.7187	0.7354	2259.51	0.0035	10176	10176	100
nat	A2007017	MOD13Q1	250m_16_days_EVI	0.0545	0.188	0.2085	0.2038	-0.005	0.5515	0.5565	2119.06	0.003	10176	10164	99.88
nat	A2007033	MOD13Q1	250m_16_days_EVI	0.0695	0.294	0.2746	0.2738	-0.0562	0.7307	0.7869	2794.59	0.0048	10176	10176	100
nat	A2007049	MOD13Q1	250m_16_days_EVI	0.0757	0.3395	0.3347	0.3341	-0.0363	0.7173	0.7536	3403.96	0.0057	10176	10170	99.94
nat	A2007065	MOD13Q1	250m_16_days_EVI	0.0846	0.4085	0.374	0.3768	-0.0061	0.8296	0.8357	3801.45	0.0072	10176	10164	99.88
nat	A2007081	MOD13Q1	250m_16_days_EVI	0.0809	0.3569	0.3443	0.3486	0.0484	0.8331	0.7847	3503.1	0.0065	10176	10176	100
nat	A2007097	MOD13Q1	250m_16_days_EVI	0.0758	0.291	0.287	0.2876	-0.003	0.797	0.8	2921	0.0057	10176	10176	100
nat	A2007113	MOD13Q1	250m_16_days_EVI	0.0778	0.2564	0.2486	0.2434	0.0274	0.9006	0.8732	2529.38	0.0061	10176	10176	100
nat	A2007129	MOD13Q1	250m_16_days_EVI	0.071	0.1798	0.1986	0.186	-0.0228	0.7982	0.821	2021.39	0.005	10176	10176	100
nat	A2007145	MOD13Q1	250m_16_days_EVI	0.0745	0.1596	0.1817	0.1652	0.0145	0.8355	0.821	1847.75	0.0056	10176	10172	99.96
nat	A2007161	MOD13Q1	250m_16_days_EVI	0.0786	0.1483	0.173	0.1535	0.0295	0.8993	0.8698	1760.26	0.0062	10176	10176	100
nat	A2007177	MOD13Q1	250m_16_days_EVI	0.0777	0.1436	0.1689	0.1494	-0.055	0.9801	1.0351	1719.01	0.006	10176	10176	100
nat	A2007193	MOD13Q1	250m_16_days_EVI	0.0784	0.1436	0.1691	0.1492	0.041	0.8671	0.8261	1721.04	0.0061	10176	10176	100
nat	A2007209	MOD13Q1	250m_16_days_EVI	0.0737	0.1419	0.1651	0.1462	-0.0065	0.9867	0.9932	1678.64	0.0054	10176	10170	99.94
nat	A2007225	MOD13Q1	250m_16_days_EVI	0.0704	0.1394	0.1613	0.1435	0.0205	0.8406	0.8201	1641.39	0.005	10176	10176	100
nat	A2007241	MOD13Q1	250m_16_days_EVI	0.0666	0.1403	0.1602	0.1445	-0.0079	0.8776	0.8855	1628.33	0.0044	10176	10167	99.91
nat	A2007257	MOD13Q1	250m_16_days_EVI	0.0637	0.1456	0.1601	0.1466	0.0511	0.8566	0.8055	1629.29	0.0041	10176	10175	99.99
nat	A2007273	MOD13Q1	250m_16_days_EVI	0.0656	0.1374	0.1561	0.1411	-0.0048	0.9447	0.9495	1587.69	0.0043	10176	10174	99.98
nat	A2007289	MOD13Q1	250m_16_days_EVI	0.0565	0.1413	0.16	0.1487	0.0242	0.8767	0.8525	1628.25	0.0032	10176	10176	100
nat	A2007305	MOD13Q1	250m_16_days_EVI	0.0554	0.1323	0.1606	0.1483	0.0011	0.7517	0.7506	1634.34	0.0031	10176	10176	100
nat	A2007321	MOD13Q1	250m_16_days_EVI	0.058	0.152	0.1728	0.1615	-0.0363	0.7787	0.815	1758.48	0.0034	10176	10174	99.98
nat	A2007337	MOD13Q1	250m_16_days_EVI	0.0551	0.1524	0.1697	0.1613	-0.0081	0.6029	0.611	1727.08	0.003	10176	10176	100
nat	A2007353	MOD13Q1	250m_16_days_EVI	0.06	0.1996	0.1924	0.1873	-0.0449	0.5786	0.6235	1957.86	0.0036	10176	10176	100
nat	A2008001	MOD13Q1	250m_16_days_EVI	0.075	0.2171	0.2408	0.2351	-0.0517	0.5844	0.6361	2450.29	0.0056	10176	10176	100
nat	A2008017	MOD13Q1	250m_16_days_EVI	0.076	0.2621	0.2642	0.2596	-0.0535	0.5952	0.6487	2688.72	0.0058	10176	10176	100
nat	A2008033	MOD13Q1	250m_16_days_EVI	0.0887	0.3514	0.3381	0.3346	-0.0323	0.7201	0.7524	3439.91	0.0079	10176	10175	99.99
nat	A2008049	MOD13Q1	250m_16_days_EVI	0.1129	0.4318	0.4523	0.4558	0.0627	0.8706	0.8079	4602.61	0.0128	10176	10176	100
nat	A2008065	MOD13Q1	250m_16_days_EVI	0.1034	0.5146	0.4866	0.4909	-0.037	0.8963	0.9333	4948.54	0.0107	10176	10170	99.94
nat	A2008081	MOD13Q1	250m_16_days_EVI	0.0961	0.5124	0.504	0.5157	0.0676	0.7965	0.7289	5128.47	0.0092	10176	10176	100
nat	A2008097	MOD13Q1	250m_16_days_EVI	0.0878	0.4138	0.4128	0.4182	0.0824	0.7487	0.6663	4199.48	0.0077	10176	10173	99.97
nat	A2008113	MOD13Q1	250m_16_days_EVI	0.0764	0.3445	0.3257	0.3288	-0.0284	0.7907	0.8191	3314.71	0.0058	10176	10176	100
nat	A2008129	MOD13Q1	250m_16_days_EVI	0.0664	0.2337	0.2666	0.2619	-0.0126	0.7525	0.7651	2713.4	0.0044	10176	10176	100
nat	A2008145	MOD13Q1	250m_16_days_EVI	0.0641	0.2014	0.2191	0.2085	0.0056	0.8709	0.8653	2229.71	0.0041	10176	10176	100
nat	A2008161	MOD13Q1	250m_16_days_EVI	0.0666	0.1813	0.2027	0.1894	-0.0195	0.925	0.9445	2062.91	0.0044	10176	10176	100
nat	A2008177	MOD13Q1	250m_16_days_EVI	0.0613	0.1877	0.202	0.1905	-0.0814	0.8744	0.9558	2055.34	0.0038	10176	10176	100
nat	A2008193	MOD13Q1	250m_16_days_EVI	0.0653	0.1812	0.1948	0.1812	0.0427	0.8045	0.7618	1981.79	0.0043	10176	10176	100
nat	A2008209	MOD13Q1	250m_16_days_EVI	0.0664	0.1662	0.187	0.1724	-0.0036	0.8527	0.8563	1902.49	0.0044	10176	10176	100
nat	A2008225	MOD13Q1	250m_16_days_EVI	0.0624	0.171	0.1823	0.1686	0.0624	0.8148	0.7524	1854.94	0.0039	10176	10176	100
nat	A2008241	MOD13Q1	250m_16_days_EVI	0.058	0.1504	0.1763	0.1638	0.0055	0.8797	0.8742	1793.72	0.0034	10176	10176	100
nat	A2008257	MOD13Q1	250m_16_days_EVI	0.058	0.1723	0.1786	0.1672	0.0548	0.7624	0.7076	1817.13	0.0034	10176	10174	99.98
nat	A2008273	MOD13Q1	250m_16_days_EVI	0.057	0.1455	0.1721	0.16	0.0443	0.7938	0.7495	1751.27	0.0033	10176	10176	100
nat	A2008289	MOD13Q1	250m_16_days_EVI	0.047	0.145	0.1652	0.1558	0.0294	0.6853	0.6559	1681.05	0.0022	10176	10175	99.99
nat	A2008305	MOD13Q1	250m_16_days_EVI	0.0591	0.1969	0.2066	0.2065	-0.0092	0.7171	0.7263	2089.58	0.0035	10176	10114	99.39
nat	A2008321	MOD13Q1	250m_16_days_EVI	0.062	0.2267	0.2116	0.2141	0.0079	0.6507	0.6428	2153.07	0.0038	10176	10176	100
nat	A2008337	MOD13Q1	250m_16_days_EVI	0.0638	0.2403	0.2151	0.2162	-0.0281	0.5769	0.605	2188.66	0.0041	10176	10176	100
nat	A2008353	MOD13Q1	250m_16_days_EVI	0.0667	0.2624	0.2344	0.2359	-0.0358	0.5017	0.5375	2385.68	0.0045	10176	10176	100
nat	A2009001	MOD13Q1	250m_16_days_EVI	0.0687	0.2575	0.2485	0.2487	-0.0051	0.5863	0.5914	2528.92	0.0047	10176	10176	100
nat	A2009017	MOD13Q1	250m_16_days_EVI	0.0775	0.3329	0.2959	0.2994	-0.0015	0.646	0.6475	3011.08	0.006	10176	10176	100
nat	A2009033	MOD13Q1	250m_16_days_EVI	0.087	0.3445	0.3326	0.3387	-0.0407	0.7721	0.8128	3383.02	0.0076	10176	10172	99.96
nat	A2009049	MOD13Q1	250m_16_days_EVI	0.0934	0.3776	0.3659	0.3726	0.0065	0.8549	0.8484	3709.89	0.0087	10176	10140	99.65
nat	A2009065	MOD13Q1	250m_16_days_EVI	0.0856	0.384	0.4181	0.4211	-0.0294	0.8289	0.8583	4254.49	0.0073	10176	10176	100
nat	A2009081	MOD13Q1	250m_16_days_EVI	0.0823	0.4058	0.4375	0.4426	0.0232	0.8165	0.7933	4450.46	0.0068	10176	10172	99.96
nat	A2009097	MOD13Q1	250m_16_days_EVI	0.0902	0.369	0.3618	0.3733	0.0352	0.9111	0.8759	3682.04	0.0081	10176	10176	100
nat	A2009113	MOD13Q1	250m_16_days_EVI	0.083	0.3237	0.2932	0.2936	-0.0199	0.7889	0.8088	2981.51	0.0069	10176	10169	99.93
nat	A2009129	MOD13Q1	250m_16_days_EVI	0.0746	0.2024	0.2058	0.1907	-0.0434	0.7943	0.8377	2094.01	0.0056	10176	10176	100
nat	A2009145	MOD13Q1	250m_16_days_EVI	0.0714	0.1449	0.1711	0.1543	0.0015	0.8631	0.8616	1740.31	0.0051	10176	10174	99.98
nat	A2009161	MOD13Q1	250m_16_days_EVI	0.077	0.1465	0.1641	0.1451	-0.0371	0.8529	0.89	1670.15	0.0059	10176	10176	100
nat	A2009177	MOD13Q1	250m_16_days_EVI	0.0741	0.1391	0.1585	0.1396	-0.0593	0.8988	0.9581	1612.59	0.0055	10176	10176	100
nat	A2009193	MOD13Q1	250m_16_days_EVI	0.074	0.1272	0.1539	0.135	-0.0411	0.8294	0.8705	1566.22	0.0055	10176	10176	100
nat	A2009209	MOD13Q1	250m_16_days_EVI	0.0661	0.1327	0.154	0.137	-0.027	0.7637	0.7907	1567.28	0.0044	10176	10176	100
nat	A2009225	MOD13Q1	250m_16_days_EVI	0.0649	0.1334	0.1527	0.1363	-0.0035	0.7929	0.7964	1553.46	0.0042	10176	10176	100
nat	A2009241	MOD13Q1	250m_16_days_EVI	0.0631	0.1295	0.1487	0.1334	0.0152	0.7735	0.7583	1513.33	0.004	10176	10176	100
nat	A2009257	MOD13Q1	250m_16_days_EVI	0.0666	0.119	0.147	0.1304	0.0523	0.8043	0.752	1493.73	0.0044	10176	10164	99.88
nat	A2009273	MOD13Q1	250m_16_days_EVI	0.0553	0.1223	0.1379	0.1246	-0.0454	0.8081	0.8535	1401.71	0.0031	10176	10164	99.88
nat	A2009289	MOD13Q1	250m_16_days_EVI	0.0735	0.2494	0.2804	0.2756	-0.0461	0.7337	0.7798	2853.62	0.0054	10176	10176	100
nat	A2009305	MOD13Q1	250m_16_days_EVI	0.0814	0.2359	0.293	0.2887	-0.0155	0.7902	0.8057	2981.23	0.0066	10176	10176	100
nat	A2009321	MOD13Q1	250m_16_days_EVI	0.088	0.1868	0.2769	0.2756	0.0532	0.7138	0.6606	2817.6	0.0077	10176	10175	99.99
nat	A2009337	MOD13Q1	250m_16_days_EVI	0.0851	0.2381	0.2594	0.2638	-0.0324	0.5422	0.5746	2639.43	0.0072	10176	10174	99.98
nat	A2009353	MOD13Q1	250m_16_days_EVI	0.0837	0.2914	0.2985	0.2974	-0.0409	0.6274	0.6683	3033.79	0.007	10176	10164	99.88
nat	A2010001	MOD13Q1	250m_16_days_EVI	0.0972	0.3939	0.4001	0.4048	-0.0341	0.7405	0.7746	4061.06	0.0094	10176	10151	99.75
nat	A2010017	MOD13Q1	250m_16_days_EVI	0.1092	0.4117	0.4384	0.4415	-0.0418	0.8451	0.8869	4412.54	0.0119	10176	10065	98.91
nat	A2010033	MOD13Q1	250m_16_days_EVI	0.1009	0.5149	0.501	0.5068	-0.0358	0.8728	0.9086	5097.85	0.0102	10176	10176	100
nat	A2010049	MOD13Q1	250m_16_days_EVI	0.1107	0.4841	0.5085	0.5185	0.0409	0.9956	0.9547	5158.29	0.0122	10176	10144	99.69
nat	A2010065	MOD13Q1	250m_16_days_EVI	0.0909	0.4857	0.5062	0.5111	0.0812	0.9431	0.8619	5150.95	0.0083	10176	10176	100
nat	A2010081	MOD13Q1	250m_16_days_EVI	0.0943	0.5659	0.5098	0.5233	-0.0097	0.8226	0.8323	5186.36	0.0089	10176	10174	99.98
nat	A2010097	MOD13Q1	250m_16_days_EVI	0.0881	0.4616	0.4725	0.4819	0.0157	0.7864	0.7707	4807.94	0.0078	10176	10176	100
nat	A2010113	MOD13Q1	250m_16_days_EVI	0.0909	0.4493	0.4203	0.4293	0.0813	0.8347	0.7534	4275.77	0.0083	10176	10173	99.97
nat	A2010129	MOD13Q1	250m_16_days_EVI	0.0978	0.2563	0.3239	0.3145	0.0422	0.6929	0.6507	3296.01	0.0096	10176	10176	100
nat	A2010145	MOD13Q1	250m_16_days_EVI	0.0783	0.1917	0.2355	0.2175	-0.0496	0.836	0.8856	2394.09	0.0061	10176	10167	99.91
nat	A2010161	MOD13Q1	250m_16_days_EVI	0.0683	0.1502	0.1919	0.1734	0.0166	0.8519	0.8353	1952.32	0.0047	10176	10174	99.98
nat	A2010177	MOD13Q1	250m_16_days_EVI	0.1068	0.1636	0.2295	0.1869	0.0619	0.7861	0.7242	2335.32	0.0114	10176	10176	100
nat	A2010193	MOD13Q1	250m_16_days_EVI	0.0663	0.1536	0.1724	0.155	-0.0169	0.8318	0.8487	1754.37	0.0044	10176	10175	99.99
nat	A2010209	MOD13Q1	250m_16_days_EVI	0.0648	0.1438	0.1689	0.1517	0.0648	0.7301	0.6653	1718.76	0.0042	10176	10174	99.98
nat	A2010225	MOD13Q1	250m_16_days_EVI	0.0601	0.1455	0.1654	0.1497	0.0002	0.769	0.7688	1682.85	0.0036	10176	10176	100
nat	A2010241	MOD13Q1	250m_16_days_EVI	0.0609	0.1431	0.1622	0.1464	0.0565	0.7815	0.725	1650.26	0.0037	10176	10176	100
nat	A2010257	MOD13Q1	250m_16_days_EVI	0.0542	0.1477	0.1607	0.1488	-0.0064	0.789	0.7954	1634.62	0.0029	10176	10174	99.98
nat	A2010273	MOD13Q1	250m_16_days_EVI	0.055	0.142	0.1585	0.1468	-0.0443	0.7616	0.8059	1612.66	0.003	10176	10176	100
nat	A2010289	MOD13Q1	250m_16_days_EVI	0.045	0.1299	0.148	0.1416	0.0405	0.6869	0.6464	1495.21	0.002	10176	10105	99.3
nat	A2010305	MOD13Q1	250m_16_days_EVI	0.0545	0.1634	0.169	0.1606	0.0135	0.7226	0.7091	1719.75	0.003	10176	10176	100
nat	A2010321	MOD13Q1	250m_16_days_EVI	0.0511	0.1627	0.1734	0.1664	-0.0345	0.6031	0.6376	1763.67	0.0026	10176	10174	99.98
nat	A2010337	MOD13Q1	250m_16_days_EVI	0.0644	0.2791	0.2511	0.247	0.0415	0.6281	0.5866	2555.47	0.0041	10176	10176	100
nat	A2010353	MOD13Q1	250m_16_days_EVI	0.0687	0.2352	0.2588	0.2557	-0.0002	0.6845	0.6847	2633.07	0.0047	10176	10176	100
nat	A2011001	MOD13Q1	250m_16_days_EVI	0.0822	0.3522	0.3102	0.3074	-0.0379	0.7936	0.8315	3111.91	0.0068	10176	10032	98.58
nat	A2011017	MOD13Q1	250m_16_days_EVI	0.0796	0.3058	0.3078	0.304	0.0571	0.7641	0.707	3132.04	0.0063	10176	10176	100
nat	A2011033	MOD13Q1	250m_16_days_EVI	0.0834	0.3788	0.3715	0.3693	-0.0182	0.7985	0.8167	3779.93	0.0069	10176	10176	100
nat	A2011049	MOD13Q1	250m_16_days_EVI	0.0966	0.4174	0.4181	0.4221	-0.0267	0.8744	0.9011	4255.08	0.0093	10176	10176	100
nat	A2011065	MOD13Q1	250m_16_days_EVI	0.114	0.5962	0.4463	0.4519	-0.0303	0.8888	0.9191	4539.74	0.013	10176	10171	99.95
nat	A2011081	MOD13Q1	250m_16_days_EVI	0.0863	0.4678	0.4611	0.4597	0.0616	0.8431	0.7815	4692.04	0.0075	10176	10176	100
nat	A2011097	MOD13Q1	250m_16_days_EVI	0.0873	0.5058	0.4647	0.4746	0.0638	0.7943	0.7305	4728.23	0.0076	10176	10175	99.99
nat	A2011113	MOD13Q1	250m_16_days_EVI	0.0845	0.4488	0.4071	0.423	-0.0051	0.7378	0.7429	4141.07	0.0071	10176	10171	99.95
nat	A2011129	MOD13Q1	250m_16_days_EVI	0.0752	0.3749	0.3121	0.318	0.0636	0.8246	0.761	3175.78	0.0057	10176	10176	100
nat	A2011145	MOD13Q1	250m_16_days_EVI	0.0665	0.2321	0.2219	0.2167	-0.0225	0.7085	0.731	2257.9	0.0044	10176	10176	100
nat	A2011161	MOD13Q1	250m_16_days_EVI	0.0743	0.1412	0.1769	0.1581	0.0317	0.7591	0.7274	1800.12	0.0055	10176	10176	100
nat	A2011177	MOD13Q1	250m_16_days_EVI	0.0751	0.1553	0.1622	0.1431	0.0492	0.791	0.7418	1650.07	0.0056	10176	10176	100
nat	A2011193	MOD13Q1	250m_16_days_EVI	0.077	0.1214	0.1525	0.129	0.0539	0.8023	0.7484	1551.21	0.0059	10176	10172	99.96
nat	A2011209	MOD13Q1	250m_16_days_EVI	0.0725	0.1127	0.149	0.1271	0.0484	0.7852	0.7368	1515.85	0.0053	10176	10176	100
nat	A2011225	MOD13Q1	250m_16_days_EVI	0.0695	0.119	0.1472	0.1276	0.0458	0.7281	0.6823	1498.3	0.0048	10176	10176	100
nat	A2011241	MOD13Q1	250m_16_days_EVI	0.0661	0.1281	0.149	0.1318	0.0249	0.739	0.7141	1516.73	0.0044	10176	10176	100
nat	A2011257	MOD13Q1	250m_16_days_EVI	0.0632	0.1315	0.1469	0.1319	-0.0055	0.7716	0.7771	1494.39	0.004	10176	10172	99.96
nat	A2011273	MOD13Q1	250m_16_days_EVI	0.0627	0.1267	0.1487	0.1341	-0.0154	0.6976	0.713	1512.78	0.0039	10176	10174	99.98
nat	A2011289	MOD13Q1	250m_16_days_EVI	0.0558	0.1253	0.1595	0.149	0.0392	0.7452	0.706	1622.94	0.0031	10176	10176	100
nat	A2011305	MOD13Q1	250m_16_days_EVI	0.0515	0.1263	0.1479	0.1351	0.0168	0.615	0.5982	1498.15	0.0026	10176	10128	99.53
nat	A2011321	MOD13Q1	250m_16_days_EVI	0.0556	0.1232	0.1428	0.1306	0.024	0.5551	0.5311	1445.38	0.0031	10176	10125	99.5
nat	A2011337	MOD13Q1	250m_16_days_EVI	0.0534	0.1072	0.1438	0.1331	0.0328	0.5032	0.4704	1460.98	0.0029	10176	10161	99.85
nat	A2011353	MOD13Q1	250m_16_days_EVI	0.0472	0.1162	0.134	0.1247	-0.034	0.4917	0.5257	1363.52	0.0022	10176	10172	99.96
nat	A2012001	MOD13Q1	250m_16_days_EVI	0.0404	0.1171	0.1272	0.12	-0.0128	0.4723	0.4851	1294.47	0.0016	10176	10176	100
nat	A2012017	MOD13Q1	250m_16_days_EVI	0.0426	0.1049	0.13	0.122	-0.0375	0.4797	0.5172	1323.28	0.0018	10176	10176	100
nat	A2012033	MOD13Q1	250m_16_days_EVI	0.0561	0.1228	0.1694	0.16	0.0097	0.5504	0.5407	1724.08	0.0032	10176	10175	99.99
nat	A2012049	MOD13Q1	250m_16_days_EVI	0.0719	0.2226	0.1997	0.1962	-0.0406	0.6352	0.6758	2031.5	0.0052	10176	10175	99.99
nat	A2012065	MOD13Q1	250m_16_days_EVI	0.0875	0.2467	0.2283	0.2276	-0.0419	0.7215	0.7634	2323.63	0.0076	10176	10176	100
nat	A2012081	MOD13Q1	250m_16_days_EVI	0.107	0.2703	0.3078	0.3089	0.0006	0.7021	0.7015	3131.85	0.0114	10176	10176	100
nat	A2012097	MOD13Q1	250m_16_days_EVI	0.1064	0.3371	0.3517	0.3509	-0.0335	0.8036	0.8371	3578.73	0.0113	10176	10176	100
nat	A2012113	MOD13Q1	250m_16_days_EVI	0.104	0.3612	0.3293	0.3312	-0.0114	0.6912	0.7026	3351.03	0.0108	10176	10176	100
nat	A2012129	MOD13Q1	250m_16_days_EVI	0.1004	0.2483	0.2725	0.2595	-0.0251	0.8197	0.8448	2769.82	0.0101	10176	10164	99.88
nat	A2012145	MOD13Q1	250m_16_days_EVI	0.0737	0.1639	0.189	0.1717	0.0487	0.7343	0.6856	1921.01	0.0054	10176	10164	99.88
nat	A2012161	MOD13Q1	250m_16_days_EVI	0.0708	0.1463	0.1694	0.1517	0.0383	0.781	0.7427	1723.73	0.005	10176	10176	100
nat	A2012177	MOD13Q1	250m_16_days_EVI	0.071	0.1399	0.1664	0.1475	0.0344	0.7292	0.6948	1691.04	0.005	10176	10165	99.89
nat	A2012193	MOD13Q1	250m_16_days_EVI	0.0694	0.1417	0.162	0.1427	0.052	0.7688	0.7168	1648.98	0.0048	10176	10176	100
nat	A2012209	MOD13Q1	250m_16_days_EVI	0.0689	0.1343	0.1592	0.1407	0.0568	0.7726	0.7158	1619.9	0.0047	10176	10173	99.97
nat	A2012225	MOD13Q1	250m_16_days_EVI	0.0669	0.1352	0.1566	0.1395	0.0646	0.8979	0.8333	1593.57	0.0045	10176	10176	100
nat	A2012241	MOD13Q1	250m_16_days_EVI	0.0625	0.1342	0.1532	0.1378	0.0542	0.7617	0.7075	1557.25	0.0039	10176	10164	99.88
nat	A2012257	MOD13Q1	250m_16_days_EVI	0.0625	0.1313	0.1526	0.1378	0.0695	0.7908	0.7213	1552.56	0.0039	10176	10172	99.96
nat	A2012273	MOD13Q1	250m_16_days_EVI	0.0591	0.1303	0.1513	0.1382	0.0461	0.8157	0.7696	1539.12	0.0035	10176	10174	99.98
nat	A2012289	MOD13Q1	250m_16_days_EVI	0.0502	0.1343	0.1497	0.1381	0.0511	0.7843	0.7332	1523.55	0.0025	10176	10176	100
nat	A2012305	MOD13Q1	250m_16_days_EVI	0.0529	0.1218	0.152	0.1399	-0.0172	0.6016	0.6188	1546.5	0.0028	10176	10176	100
nat	A2012321	MOD13Q1	250m_16_days_EVI	0.0598	0.1964	0.1965	0.1944	0.0063	0.7621	0.7558	1997.75	0.0036	10176	10166	99.9
nat	A2012337	MOD13Q1	250m_16_days_EVI	0.0783	0.277	0.2842	0.2852	-0.0489	0.8059	0.8548	2892.44	0.0061	10176	10176	100
nat	A2012353	MOD13Q1	250m_16_days_EVI	0.0844	0.3211	0.3235	0.3251	-0.013	0.7335	0.7465	3291.46	0.0071	10176	10173	99.97
nat	A2013001	MOD13Q1	250m_16_days_EVI	0.0822	0.3736	0.3502	0.3528	-0.0432	0.784	0.8272	3561.89	0.0068	10176	10170	99.94
nat	A2013017	MOD13Q1	250m_16_days_EVI	0.0912	0.4144	0.3873	0.3896	0.0427	0.7176	0.6749	3937.6	0.0083	10176	10166	99.9
nat	A2013033	MOD13Q1	250m_16_days_EVI	0.0967	0.4429	0.4195	0.423	-0.025	0.8325	0.8575	4268.43	0.0094	10176	10174	99.98
nat	A2013049	MOD13Q1	250m_16_days_EVI	0.1042	0.4177	0.4525	0.4564	0.012	0.8621	0.8501	4604.23	0.0108	10176	10176	100
nat	A2013065	MOD13Q1	250m_16_days_EVI	0.1017	0.5153	0.475	0.4842	0.0513	0.8588	0.8075	4833.62	0.0103	10176	10176	100
nat	A2013081	MOD13Q1	250m_16_days_EVI	0.0919	0.4233	0.3945	0.4078	-0.0319	0.7157	0.7476	4011.13	0.0084	10176	10168	99.92
nat	A2013097	MOD13Q1	250m_16_days_EVI	0.0845	0.3755	0.3411	0.3478	0.0786	0.7631	0.6845	3467.43	0.0071	10176	10164	99.88
nat	A2013113	MOD13Q1	250m_16_days_EVI	0.0656	0.2491	0.2472	0.2439	-0.0808	0.7862	0.867	2514.69	0.0043	10176	10173	99.97
nat	A2013129	MOD13Q1	250m_16_days_EVI	0.0643	0.1804	0.2022	0.1908	0.0187	0.8461	0.8274	2057.88	0.0041	10176	10176	100
nat	A2013145	MOD13Q1	250m_16_days_EVI	0.0649	0.1677	0.1887	0.1747	-0.0812	0.911	0.9922	1920.6	0.0042	10176	10176	100
nat	A2013161	MOD13Q1	250m_16_days_EVI	0.0715	0.1639	0.1809	0.1637	0.0244	0.8051	0.7807	1838.9	0.0051	10176	10167	99.91
nat	A2013177	MOD13Q1	250m_16_days_EVI	0.0766	0.1411	0.1721	0.1531	0.024	0.9977	0.9737	1749.73	0.0059	10176	10164	99.88
nat	A2013193	MOD13Q1	250m_16_days_EVI	0.0703	0.1474	0.1678	0.1505	0.0203	0.784	0.7637	1707.5	0.0049	10176	10176	100
nat	A2013241	MOD13Q1	250m_16_days_EVI	0.0662	0.143	0.1615	0.1464	0.0259	0.8434	0.8175	1643.37	0.0044	10176	10176	100
nat	A2013257	MOD13Q1	250m_16_days_EVI	0.0679	0.148	0.1615	0.1459	0.0145	0.8988	0.8843	1641.32	0.0046	10176	10164	99.88
nat	A2013273	MOD13Q1	250m_16_days_EVI	0.0572	0.1246	0.1495	0.1345	-0.0333	0.8016	0.8349	1520.3	0.0033	10176	10170	99.94
nat	A2013289	MOD13Q1	250m_16_days_EVI	0.0542	0.1208	0.1416	0.1281	0.0611	0.9457	0.8846	1439.61	0.0029	10176	10164	99.88
nat	A2013305	MOD13Q1	250m_16_days_EVI	0.0438	0.1293	0.1394	0.1313	-0.0478	0.7307	0.7785	1417.27	0.0019	10176	10164	99.88
nat	A2013321	MOD13Q1	250m_16_days_EVI	0.0452	0.1387	0.1532	0.1487	-0.0128	0.5477	0.5605	1448.53	0.002	10176	9458	92.94
nat	A2013337	MOD13Q1	250m_16_days_EVI	0.0431	0.1778	0.1797	0.175	-0.0435	0.6735	0.717	1781.77	0.0019	10176	9913	97.42
nat	A2013353	MOD13Q1	250m_16_days_EVI	0.0392	0.1729	0.1769	0.1742	0.0529	0.5008	0.4479	1762.09	0.0015	10176	9960	97.88
nat	A2014001	MOD13Q1	250m_16_days_EVI	0.0363	0.1706	0.1706	0.1682	-0.0059	0.4693	0.4752	1720.86	0.0013	10176	10088	99.14
nat	A2014017	MOD13Q1	250m_16_days_EVI	0.0362	0.1548	0.1636	0.1598	-0.0219	0.4729	0.4948	1615.23	0.0013	10176	9872	97.01
nat	A2014033	MOD13Q1	250m_16_days_EVI	0.0495	0.1744	0.1703	0.1638	0.0402	0.5382	0.498	1733.09	0.0025	10176	10175	99.99
urb	A2000049	MOD13Q1	250m_16_days_EVI	0.0951	0.1887	0.2149	0.2083	-0.062	0.7869	0.8489	1290.04	0.0091	6078	6002	98.75
urb	A2000065	MOD13Q1	250m_16_days_EVI	0.1042	0.2617	0.2588	0.247	-0.0686	0.8488	0.9174	1566.55	0.0109	6078	6052	99.57
urb	A2000081	MOD13Q1	250m_16_days_EVI	0.1144	0.2353	0.2717	0.2541	-0.0668	0.95	1.0168	1647.02	0.0131	6078	6061	99.72
urb	A2000097	MOD13Q1	250m_16_days_EVI	0.1068	0.2298	0.2641	0.2529	-0.0641	0.901	0.9651	1605.22	0.0114	6078	6077	99.98
urb	A2000113	MOD13Q1	250m_16_days_EVI	0.1014	0.245	0.2664	0.2585	-0.0645	0.8291	0.8936	1616.35	0.0103	6078	6067	99.82
urb	A2000129	MOD13Q1	250m_16_days_EVI	0.0829	0.2081	0.2346	0.2319	-0.0775	0.7798	0.8573	1419.04	0.0069	6078	6050	99.54
urb	A2000145	MOD13Q1	250m_16_days_EVI	0.0827	0.2372	0.2394	0.2365	-0.0929	0.8421	0.935	1451.61	0.0068	6078	6064	99.77
urb	A2000161	MOD13Q1	250m_16_days_EVI	0.0835	0.2493	0.2309	0.2263	-0.0878	0.8414	0.9292	1396.96	0.007	6078	6051	99.56
urb	A2000177	MOD13Q1	250m_16_days_EVI	0.0884	0.1801	0.2283	0.2202	-0.078	0.9207	0.9987	1381.96	0.0078	6078	6053	99.59
urb	A2000193	MOD13Q1	250m_16_days_EVI	0.0928	0.2233	0.2304	0.2203	-0.0654	0.8607	0.9261	1397	0.0086	6078	6063	99.75
urb	A2000209	MOD13Q1	250m_16_days_EVI	0.0947	0.2063	0.2233	0.2129	-0.0677	0.9901	1.0578	1351.97	0.009	6078	6054	99.61
urb	A2000225	MOD13Q1	250m_16_days_EVI	0.0938	0.208	0.2169	0.2054	-0.0743	0.8776	0.9519	1295.66	0.0088	6078	5973	98.27
urb	A2000241	MOD13Q1	250m_16_days_EVI	0.0937	0.2154	0.215	0.203	-0.0675	0.8405	0.908	1303.29	0.0088	6078	6063	99.75
urb	A2000257	MOD13Q1	250m_16_days_EVI	0.0863	0.1832	0.207	0.1957	-0.0489	0.8984	0.9473	1255.58	0.0075	6078	6066	99.8
urb	A2000273	MOD13Q1	250m_16_days_EVI	0.0792	0.1666	0.1955	0.1887	-0.0693	0.8071	0.8764	1185.27	0.0063	6078	6063	99.75
urb	A2000289	MOD13Q1	250m_16_days_EVI	0.0789	0.213	0.1941	0.1889	-0.0655	0.7836	0.8491	1172.57	0.0062	6078	6040	99.37
urb	A2000305	MOD13Q1	250m_16_days_EVI	0.0785	0.185	0.2	0.1955	-0.0842	0.7394	0.8236	1213.97	0.0062	6078	6069	99.85
urb	A2000321	MOD13Q1	250m_16_days_EVI	0.0718	0.2083	0.1966	0.1974	-0.061	0.7155	0.7765	1192.61	0.0052	6078	6065	99.79
urb	A2000337	MOD13Q1	250m_16_days_EVI	0.069	0.1763	0.1875	0.1828	-0.0531	0.6384	0.6915	1132.4	0.0048	6078	6041	99.39
urb	A2000353	MOD13Q1	250m_16_days_EVI	0.072	0.2299	0.1938	0.1911	-0.0681	0.6865	0.7546	1176.31	0.0052	6078	6070	99.87
urb	A2001001	MOD13Q1	250m_16_days_EVI	0.077	0.2577	0.2014	0.1956	-0.0612	0.7161	0.7773	1220.14	0.0059	6078	6059	99.69
urb	A2001017	MOD13Q1	250m_16_days_EVI	0.0792	0.2102	0.2028	0.1962	-0.0973	0.6474	0.7447	1230.42	0.0063	6078	6067	99.82
urb	A2001033	MOD13Q1	250m_16_days_EVI	0.0875	0.1705	0.2187	0.2116	-0.0676	0.7305	0.7981	1326.25	0.0076	6078	6063	99.75
urb	A2001049	MOD13Q1	250m_16_days_EVI	0.0987	0.2094	0.2221	0.2129	-0.0795	0.8317	0.9112	1344.39	0.0097	6078	6053	99.59
urb	A2001065	MOD13Q1	250m_16_days_EVI	0.1077	0.2604	0.2634	0.2474	-0.0679	0.9163	0.9842	1600.66	0.0116	6078	6077	99.98
urb	A2001081	MOD13Q1	250m_16_days_EVI	0.1134	0.2273	0.3086	0.2929	-0.0621	0.8494	0.9115	1873.83	0.0129	6078	6072	99.9
urb	A2001097	MOD13Q1	250m_16_days_EVI	0.0966	0.2135	0.2436	0.2378	-0.0729	0.7961	0.869	1480.11	0.0093	6078	6077	99.98
urb	A2001113	MOD13Q1	250m_16_days_EVI	0.0901	0.2464	0.249	0.2418	-0.0675	0.7767	0.8442	1511.09	0.0081	6078	6069	99.85
urb	A2001129	MOD13Q1	250m_16_days_EVI	0.0806	0.2368	0.2328	0.231	-0.0724	0.8103	0.8827	1412.61	0.0065	6078	6068	99.84
urb	A2001145	MOD13Q1	250m_16_days_EVI	0.0842	0.2313	0.2262	0.2207	-0.0768	0.8117	0.8885	1373.37	0.0071	6078	6072	99.9
urb	A2001161	MOD13Q1	250m_16_days_EVI	0.0786	0.217	0.221	0.2193	-0.0844	0.8149	0.8993	1340.46	0.0062	6078	6065	99.79
urb	A2001177	MOD13Q1	250m_16_days_EVI	0.0824	0.2167	0.2119	0.2065	-0.0905	0.8616	0.9521	1286.74	0.0068	6078	6073	99.92
urb	A2001193	MOD13Q1	250m_16_days_EVI	0.0914	0.2193	0.2235	0.2132	-0.108	0.9424	1.0504	1358.52	0.0084	6078	6078	100
urb	A2001209	MOD13Q1	250m_16_days_EVI	0.0968	0.233	0.2195	0.2066	-0.0854	0.9647	1.0501	1331.52	0.0094	6078	6067	99.82
urb	A2001225	MOD13Q1	250m_16_days_EVI	0.0972	0.2147	0.2139	0.1999	-0.0762	0.8756	0.9518	1296.07	0.0094	6078	6059	99.69
urb	A2001241	MOD13Q1	250m_16_days_EVI	0.0894	0.1851	0.2058	0.1946	-0.0697	0.919	0.9887	1244.29	0.008	6078	6046	99.47
urb	A2001257	MOD13Q1	250m_16_days_EVI	0.0842	0.1993	0.2012	0.1919	-0.0535	0.8715	0.925	1222.2	0.0071	6078	6076	99.97
urb	A2001273	MOD13Q1	250m_16_days_EVI	0.0774	0.176	0.1919	0.1853	-0.0623	0.7877	0.85	1165.13	0.006	6078	6072	99.9
urb	A2001289	MOD13Q1	250m_16_days_EVI	0.0737	0.1622	0.1817	0.1769	-0.0657	0.7831	0.8488	1100.24	0.0054	6078	6055	99.62
urb	A2001305	MOD13Q1	250m_16_days_EVI	0.0686	0.1612	0.1739	0.1708	-0.0654	0.7185	0.7839	1051.83	0.0047	6078	6050	99.54
urb	A2001321	MOD13Q1	250m_16_days_EVI	0.0688	0.2353	0.1936	0.195	-0.0826	0.752	0.8346	1173.96	0.0047	6078	6065	99.79
urb	A2001337	MOD13Q1	250m_16_days_EVI	0.0724	0.2108	0.1927	0.1912	-0.0621	0.7405	0.8026	1169.95	0.0052	6078	6071	99.88
urb	A2001353	MOD13Q1	250m_16_days_EVI	0.0834	0.1882	0.2531	0.2505	-0.0517	0.6485	0.7002	1479.57	0.007	6078	5846	96.18
urb	A2002001	MOD13Q1	250m_16_days_EVI	0.0928	0.1582	0.2291	0.221	-0.0647	0.7809	0.8456	1387.43	0.0086	6078	6057	99.65
urb	A2002017	MOD13Q1	250m_16_days_EVI	0.091	0.1731	0.2257	0.215	-0.0802	0.7897	0.8699	1369.31	0.0083	6078	6068	99.84
urb	A2002033	MOD13Q1	250m_16_days_EVI	0.0976	0.1914	0.2343	0.2208	-0.0588	0.7371	0.7959	1417.41	0.0095	6078	6050	99.54
urb	A2002049	MOD13Q1	250m_16_days_EVI	0.1203	0.2491	0.2654	0.2419	-0.0623	0.9385	1.0008	1610.24	0.0145	6078	6067	99.82
urb	A2002065	MOD13Q1	250m_16_days_EVI	0.127	0.2296	0.2757	0.2488	-0.0897	0.9348	1.0245	1668.09	0.0161	6078	6051	99.56
urb	A2002081	MOD13Q1	250m_16_days_EVI	0.1298	0.3231	0.2849	0.2558	-0.0631	0.9307	0.9938	1722.41	0.0168	6078	6046	99.47
urb	A2002097	MOD13Q1	250m_16_days_EVI	0.1147	0.2654	0.2749	0.2571	-0.0637	0.9108	0.9745	1664.07	0.0131	6078	6054	99.61
urb	A2002113	MOD13Q1	250m_16_days_EVI	0.0951	0.2314	0.287	0.2731	-0.0735	0.9157	0.9892	1742.48	0.009	6078	6071	99.88
urb	A2002129	MOD13Q1	250m_16_days_EVI	0.0838	0.269	0.2403	0.2361	-0.0759	0.894	0.9699	1451.76	0.007	6078	6041	99.39
urb	A2002145	MOD13Q1	250m_16_days_EVI	0.0808	0.2083	0.2283	0.2247	-0.0833	0.8057	0.889	1382.27	0.0065	6078	6054	99.61
urb	A2002161	MOD13Q1	250m_16_days_EVI	0.0822	0.2359	0.2268	0.2225	-0.0961	0.8093	0.9054	1372.63	0.0068	6078	6053	99.59
urb	A2002177	MOD13Q1	250m_16_days_EVI	0.0861	0.2043	0.227	0.2198	-0.0978	0.9486	1.0464	1364.99	0.0074	6078	6012	98.91
urb	A2002193	MOD13Q1	250m_16_days_EVI	0.0911	0.2191	0.2291	0.2191	-0.062	0.8727	0.9347	1385.48	0.0083	6078	6047	99.49
urb	A2002209	MOD13Q1	250m_16_days_EVI	0.097	0.2215	0.2311	0.2197	-0.0789	0.9143	0.9932	1384.04	0.0094	6078	5989	98.54
urb	A2002225	MOD13Q1	250m_16_days_EVI	0.0966	0.2265	0.2229	0.2116	-0.0849	0.9567	1.0416	1352.3	0.0093	6078	6067	99.82
urb	A2002241	MOD13Q1	250m_16_days_EVI	0.0892	0.2158	0.2241	0.2098	-0.0496	0.9077	0.9573	1360.26	0.0079	6078	6071	99.88
urb	A2002257	MOD13Q1	250m_16_days_EVI	0.0837	0.186	0.2073	0.1968	-0.0852	0.8449	0.9301	1258.38	0.007	6078	6071	99.88
urb	A2002273	MOD13Q1	250m_16_days_EVI	0.075	0.1642	0.1982	0.1915	-0.0637	0.8185	0.8822	1203.43	0.0056	6078	6073	99.92
urb	A2002289	MOD13Q1	250m_16_days_EVI	0.0689	0.1757	0.1888	0.1839	-0.0657	0.873	0.9387	1141.18	0.0048	6078	6043	99.42
urb	A2002305	MOD13Q1	250m_16_days_EVI	0.0657	0.1795	0.1746	0.1713	-0.0496	0.797	0.8466	1053.9	0.0043	6078	6037	99.33
urb	A2002321	MOD13Q1	250m_16_days_EVI	0.0703	0.1853	0.1917	0.1897	-0.048	0.6065	0.6545	1154.51	0.0049	6078	6021	99.06
urb	A2002337	MOD13Q1	250m_16_days_EVI	0.0662	0.2219	0.1781	0.1783	-0.0496	0.6774	0.727	1074.72	0.0044	6078	6035	99.29
urb	A2002353	MOD13Q1	250m_16_days_EVI	0.0784	0.1698	0.1901	0.1886	-0.0676	0.6418	0.7094	1150.45	0.0061	6078	6053	99.59
urb	A2003001	MOD13Q1	250m_16_days_EVI	0.0911	0.2548	0.2295	0.221	-0.063	0.6658	0.7288	1390.12	0.0083	6078	6058	99.67
urb	A2003017	MOD13Q1	250m_16_days_EVI	0.1016	0.2094	0.2295	0.2136	-0.1084	0.9418	1.0502	1336.67	0.0103	6078	5823	95.8
urb	A2003033	MOD13Q1	250m_16_days_EVI	0.1094	0.2102	0.2552	0.2389	-0.072	0.9889	1.0609	1542.73	0.012	6078	6045	99.46
urb	A2003049	MOD13Q1	250m_16_days_EVI	0.1169	0.2069	0.2611	0.2394	-0.0749	0.8922	0.9671	1584.36	0.0137	6078	6068	99.84
urb	A2003065	MOD13Q1	250m_16_days_EVI	0.1239	0.2522	0.2831	0.2572	-0.0556	0.992	1.0476	1717.82	0.0154	6078	6067	99.82
urb	A2003081	MOD13Q1	250m_16_days_EVI	0.121	0.223	0.2788	0.2517	-0.0615	0.9199	0.9814	1683.33	0.0146	6078	6038	99.34
urb	A2003097	MOD13Q1	250m_16_days_EVI	0.1137	0.2623	0.2768	0.2588	-0.059	0.9167	0.9757	1669.43	0.0129	6078	6031	99.23
urb	A2003113	MOD13Q1	250m_16_days_EVI	0.1	0.2167	0.2502	0.2379	-0.0666	0.81	0.8766	1516.84	0.01	6078	6062	99.74
urb	A2003129	MOD13Q1	250m_16_days_EVI	0.0894	0.231	0.2493	0.2406	-0.0738	0.7761	0.8499	1507.02	0.008	6078	6046	99.47
urb	A2003145	MOD13Q1	250m_16_days_EVI	0.0801	0.1918	0.239	0.2362	-0.0825	0.7725	0.855	1435.3	0.0064	6078	6006	98.82
urb	A2003161	MOD13Q1	250m_16_days_EVI	0.0787	0.2362	0.2336	0.2304	-0.0898	0.7729	0.8627	1419.86	0.0062	6078	6077	99.98
urb	A2003177	MOD13Q1	250m_16_days_EVI	0.0871	0.2325	0.2323	0.2248	-0.0992	0.8176	0.9168	1411.29	0.0076	6078	6074	99.93
urb	A2003193	MOD13Q1	250m_16_days_EVI	0.0872	0.2216	0.2256	0.2163	-0.0863	0.9363	1.0226	1369.89	0.0076	6078	6071	99.88
urb	A2003209	MOD13Q1	250m_16_days_EVI	0.0921	0.1835	0.2262	0.2143	-0.069	0.9716	1.0406	1365.3	0.0085	6078	6036	99.31
urb	A2003225	MOD13Q1	250m_16_days_EVI	0.0952	0.196	0.225	0.2117	-0.0537	0.889	0.9427	1364.85	0.0091	6078	6065	99.79
urb	A2003241	MOD13Q1	250m_16_days_EVI	0.0986	0.1771	0.2297	0.2125	-0.0671	0.9775	1.0446	1394.67	0.0097	6078	6071	99.88
urb	A2003257	MOD13Q1	250m_16_days_EVI	0.0791	0.2009	0.211	0.2031	-0.0553	0.8206	0.8759	1276	0.0063	6078	6047	99.49
urb	A2003273	MOD13Q1	250m_16_days_EVI	0.0739	0.1833	0.2008	0.1945	-0.0561	0.7947	0.8508	1210.6	0.0055	6078	6029	99.19
urb	A2003289	MOD13Q1	250m_16_days_EVI	0.067	0.1926	0.1902	0.1859	-0.0633	0.5886	0.6519	1143.73	0.0045	6078	6014	98.95
urb	A2003305	MOD13Q1	250m_16_days_EVI	0.0673	0.1943	0.1813	0.1788	-0.0577	0.6102	0.6679	1096.63	0.0045	6078	6050	99.54
urb	A2003321	MOD13Q1	250m_16_days_EVI	0.0641	0.175	0.177	0.177	-0.0703	0.726	0.7963	1068.13	0.0041	6078	6033	99.26
urb	A2003337	MOD13Q1	250m_16_days_EVI	0.067	0.1754	0.177	0.1754	-0.0522	0.6046	0.6568	1063.37	0.0045	6078	6009	98.86
urb	A2003353	MOD13Q1	250m_16_days_EVI	0.0777	0.2015	0.1839	0.1774	-0.0541	0.9172	0.9713	1114.03	0.006	6078	6058	99.67
urb	A2004001	MOD13Q1	250m_16_days_EVI	0.0797	0.1695	0.188	0.1807	-0.0664	0.9172	0.9836	1136.77	0.0064	6078	6048	99.51
urb	A2004017	MOD13Q1	250m_16_days_EVI	0.0919	0.2162	0.2133	0.2007	-0.054	0.8951	0.9491	1284.22	0.0084	6078	6020	99.05
urb	A2004033	MOD13Q1	250m_16_days_EVI	0.1011	0.1744	0.232	0.2193	-0.0693	0.8922	0.9615	1409.2	0.0102	6078	6074	99.93
urb	A2004049	MOD13Q1	250m_16_days_EVI	0.1267	0.2334	0.282	0.264	-0.0781	0.9849	1.063	1684.95	0.0161	6078	5976	98.32
urb	A2004065	MOD13Q1	250m_16_days_EVI	0.1255	0.1983	0.2863	0.2606	-0.0653	0.9206	0.9859	1739.2	0.0157	6078	6074	99.93
urb	A2004081	MOD13Q1	250m_16_days_EVI	0.1154	0.2628	0.2782	0.2606	-0.065	0.8234	0.8884	1685.18	0.0133	6078	6057	99.65
urb	A2004097	MOD13Q1	250m_16_days_EVI	0.1044	0.2725	0.2774	0.27	-0.0718	0.7241	0.7959	1655.84	0.0109	6078	5970	98.22
urb	A2004113	MOD13Q1	250m_16_days_EVI	0.0861	0.2396	0.2499	0.2422	-0.0803	0.9539	1.0342	1519.04	0.0074	6078	6078	100
urb	A2004129	MOD13Q1	250m_16_days_EVI	0.0808	0.213	0.2356	0.2341	-0.0893	0.8831	0.9724	1430.52	0.0065	6078	6071	99.88
urb	A2004145	MOD13Q1	250m_16_days_EVI	0.082	0.2361	0.2268	0.2219	-0.0964	0.8219	0.9183	1376.98	0.0067	6078	6072	99.9
urb	A2004161	MOD13Q1	250m_16_days_EVI	0.0831	0.2433	0.2275	0.2206	-0.1086	0.8756	0.9842	1379.75	0.0069	6078	6066	99.8
urb	A2004177	MOD13Q1	250m_16_days_EVI	0.0867	0.2317	0.2256	0.2183	-0.0866	0.903	0.9896	1363.76	0.0075	6078	6045	99.46
urb	A2004193	MOD13Q1	250m_16_days_EVI	0.0914	0.1943	0.2236	0.2137	-0.0775	0.917	0.9945	1356.94	0.0084	6078	6069	99.85
urb	A2004209	MOD13Q1	250m_16_days_EVI	0.0938	0.1816	0.2207	0.2087	-0.0825	0.8882	0.9707	1338.54	0.0088	6078	6064	99.77
urb	A2004225	MOD13Q1	250m_16_days_EVI	0.0873	0.2086	0.2134	0.2029	-0.0622	0.9454	1.0076	1294.22	0.0076	6078	6066	99.8
urb	A2004241	MOD13Q1	250m_16_days_EVI	0.0849	0.1992	0.2115	0.2001	-0.0542	0.9299	0.9841	1281.32	0.0072	6078	6059	99.69
urb	A2004257	MOD13Q1	250m_16_days_EVI	0.0787	0.1977	0.2052	0.1974	-0.067	0.8166	0.8836	1247.41	0.0062	6078	6078	100
urb	A2004273	MOD13Q1	250m_16_days_EVI	0.0744	0.217	0.1955	0.1885	-0.059	0.8268	0.8858	1184.07	0.0055	6078	6058	99.67
urb	A2004289	MOD13Q1	250m_16_days_EVI	0.0787	0.1936	0.1942	0.1916	-0.0887	0.8782	0.9669	1176.79	0.0062	6078	6059	99.69
urb	A2004305	MOD13Q1	250m_16_days_EVI	0.0702	0.1313	0.1972	0.1965	-0.0472	0.7244	0.7716	1197.87	0.0049	6078	6075	99.95
urb	A2004321	MOD13Q1	250m_16_days_EVI	0.0846	0.2098	0.2351	0.2291	-0.0652	0.8272	0.8924	1426.72	0.0072	6078	6069	99.85
urb	A2004337	MOD13Q1	250m_16_days_EVI	0.0771	0.1821	0.2084	0.202	-0.0566	0.6437	0.7003	1265.09	0.0059	6078	6071	99.88
urb	A2004353	MOD13Q1	250m_16_days_EVI	0.0924	0.1825	0.2244	0.2109	-0.0544	0.7189	0.7733	1358.74	0.0085	6078	6056	99.64
urb	A2005001	MOD13Q1	250m_16_days_EVI	0.1073	0.1779	0.22	0.203	-0.1054	0.8784	0.9838	1289.09	0.0115	6078	5860	96.41
urb	A2005017	MOD13Q1	250m_16_days_EVI	0.1183	0.1876	0.2517	0.231	-0.063	0.9044	0.9674	1522.16	0.014	6078	6048	99.51
urb	A2005033	MOD13Q1	250m_16_days_EVI	0.1157	0.209	0.2426	0.2213	-0.0656	0.8582	0.9238	1464.41	0.0134	6078	6036	99.31
urb	A2005049	MOD13Q1	250m_16_days_EVI	0.132	0.2157	0.2818	0.2513	-0.0529	0.9041	0.957	1707.47	0.0174	6078	6059	99.69
urb	A2005065	MOD13Q1	250m_16_days_EVI	0.1332	0.2494	0.2848	0.2532	-0.0927	0.8763	0.969	1728.97	0.0177	6078	6071	99.88
urb	A2005081	MOD13Q1	250m_16_days_EVI	0.1293	0.2228	0.2848	0.2564	-0.0666	0.899	0.9656	1725.99	0.0167	6078	6060	99.7
urb	A2005097	MOD13Q1	250m_16_days_EVI	0.119	0.3032	0.2955	0.2699	-0.0623	0.8526	0.9149	1790.76	0.0142	6078	6060	99.7
urb	A2005113	MOD13Q1	250m_16_days_EVI	0.1061	0.2431	0.2608	0.245	-0.0773	0.8676	0.9449	1583.11	0.0112	6078	6071	99.88
urb	A2005129	MOD13Q1	250m_16_days_EVI	0.0941	0.2266	0.2488	0.2393	-0.0886	0.9125	1.0011	1504.95	0.0089	6078	6050	99.54
urb	A2005145	MOD13Q1	250m_16_days_EVI	0.086	0.232	0.2319	0.2273	-0.1113	0.9515	1.0628	1403.99	0.0074	6078	6053	99.59
urb	A2005161	MOD13Q1	250m_16_days_EVI	0.0824	0.2429	0.224	0.2197	-0.1024	0.8182	0.9206	1361.2	0.0068	6078	6077	99.98
urb	A2005177	MOD13Q1	250m_16_days_EVI	0.0906	0.221	0.2303	0.2214	-0.1032	0.9986	1.1018	1396.53	0.0082	6078	6065	99.79
urb	A2005193	MOD13Q1	250m_16_days_EVI	0.0887	0.216	0.2257	0.2159	-0.0799	0.8006	0.8805	1368.23	0.0079	6078	6061	99.72
urb	A2005209	MOD13Q1	250m_16_days_EVI	0.0927	0.2237	0.2251	0.2136	-0.0746	0.8949	0.9695	1366.52	0.0086	6078	6071	99.88
urb	A2005225	MOD13Q1	250m_16_days_EVI	0.0965	0.2035	0.2237	0.2107	-0.0734	0.9349	1.0083	1358.6	0.0093	6078	6072	99.9
urb	A2005241	MOD13Q1	250m_16_days_EVI	0.0913	0.2132	0.2143	0.2014	-0.0659	0.8866	0.9525	1295.26	0.0083	6078	6045	99.46
urb	A2005257	MOD13Q1	250m_16_days_EVI	0.0874	0.1986	0.2095	0.1978	-0.0526	0.85	0.9026	1268.15	0.0076	6078	6053	99.59
urb	A2005273	MOD13Q1	250m_16_days_EVI	0.0804	0.2155	0.2016	0.1929	-0.0605	0.7915	0.852	1222.15	0.0065	6078	6062	99.74
urb	A2005289	MOD13Q1	250m_16_days_EVI	0.0748	0.188	0.193	0.1857	-0.0633	0.769	0.8323	1171.25	0.0056	6078	6069	99.85
urb	A2005305	MOD13Q1	250m_16_days_EVI	0.0728	0.1791	0.1831	0.1791	-0.0555	0.7905	0.846	1106	0.0053	6078	6041	99.39
urb	A2005321	MOD13Q1	250m_16_days_EVI	0.068	0.1712	0.1727	0.1673	-0.0606	0.6549	0.7155	1048.11	0.0046	6078	6070	99.87
urb	A2005337	MOD13Q1	250m_16_days_EVI	0.0658	0.1422	0.1633	0.1607	-0.0638	0.611	0.6748	985.994	0.0043	6078	6037	99.33
urb	A2005353	MOD13Q1	250m_16_days_EVI	0.0661	0.1656	0.1458	0.1448	-0.0692	0.6738	0.743	535.986	0.0044	6078	3676	60.48
urb	A2006001	MOD13Q1	250m_16_days_EVI	0.0702	0.1493	0.1694	0.1665	-0.0681	0.6352	0.7033	1024.24	0.0049	6078	6045	99.46
urb	A2006017	MOD13Q1	250m_16_days_EVI	0.0707	0.1637	0.1826	0.1769	-0.0747	0.6582	0.7329	1108.08	0.005	6078	6070	99.87
urb	A2006033	MOD13Q1	250m_16_days_EVI	0.1006	0.1825	0.226	0.2095	-0.0624	0.8301	0.8925	1369.08	0.0101	6078	6057	99.65
urb	A2006049	MOD13Q1	250m_16_days_EVI	0.1033	0.1926	0.2307	0.2134	-0.0818	0.9425	1.0243	1396.63	0.0107	6078	6055	99.62
urb	A2006065	MOD13Q1	250m_16_days_EVI	0.1158	0.2473	0.2354	0.2139	-0.0605	0.9408	1.0013	1425.35	0.0134	6078	6054	99.61
urb	A2006081	MOD13Q1	250m_16_days_EVI	0.1277	0.2221	0.2576	0.24	-0.0535	0.9767	1.0302	1279.06	0.0163	6078	4966	81.7
urb	A2006097	MOD13Q1	250m_16_days_EVI	0.1173	0.2466	0.2627	0.2423	-0.0713	0.9706	1.0419	1595.89	0.0138	6078	6074	99.93
urb	A2006113	MOD13Q1	250m_16_days_EVI	0.111	0.2465	0.273	0.2531	-0.0742	0.9708	1.045	1653.37	0.0123	6078	6057	99.65
urb	A2006129	MOD13Q1	250m_16_days_EVI	0.0947	0.2418	0.264	0.2552	-0.0683	0.9296	0.9979	1601.27	0.009	6078	6065	99.79
urb	A2006145	MOD13Q1	250m_16_days_EVI	0.084	0.1828	0.2428	0.2392	-0.0913	0.8552	0.9465	1469.58	0.0071	6078	6052	99.57
urb	A2006161	MOD13Q1	250m_16_days_EVI	0.0829	0.2379	0.2312	0.2283	-0.0865	0.8783	0.9648	1398.88	0.0069	6078	6050	99.54
urb	A2006177	MOD13Q1	250m_16_days_EVI	0.0822	0.2035	0.2287	0.2225	-0.0853	0.8987	0.984	1388.66	0.0068	6078	6073	99.92
urb	A2006193	MOD13Q1	250m_16_days_EVI	0.0878	0.2492	0.2308	0.2212	-0.0648	0.9673	1.0321	1399.4	0.0077	6078	6063	99.75
urb	A2006209	MOD13Q1	250m_16_days_EVI	0.092	0.1895	0.2262	0.2142	-0.0758	0.9645	1.0403	1372.93	0.0085	6078	6069	99.85
urb	A2006225	MOD13Q1	250m_16_days_EVI	0.0964	0.1511	0.2229	0.209	-0.0736	0.9088	0.9824	1350.06	0.0093	6078	6056	99.64
urb	A2006241	MOD13Q1	250m_16_days_EVI	0.0952	0.204	0.224	0.2096	-0.0734	0.992	1.0654	1359.96	0.0091	6078	6072	99.9
urb	A2006257	MOD13Q1	250m_16_days_EVI	0.0839	0.1641	0.2115	0.1994	-0.0749	0.7865	0.8614	1278.05	0.007	6078	6044	99.44
urb	A2006273	MOD13Q1	250m_16_days_EVI	0.0757	0.1896	0.1986	0.1924	-0.0658	0.8747	0.9405	1204.61	0.0057	6078	6067	99.82
urb	A2006289	MOD13Q1	250m_16_days_EVI	0.0714	0.1697	0.1929	0.187	-0.0506	0.807	0.8576	1168.76	0.0051	6078	6060	99.7
urb	A2006305	MOD13Q1	250m_16_days_EVI	0.065	0.1556	0.1717	0.1696	-0.0544	0.7847	0.8391	1042.45	0.0042	6078	6070	99.87
urb	A2006321	MOD13Q1	250m_16_days_EVI	0.065	0.1658	0.1749	0.1712	-0.0471	0.5783	0.6254	1061.54	0.0042	6078	6069	99.85
urb	A2006337	MOD13Q1	250m_16_days_EVI	0.0617	0.1433	0.1694	0.1665	-0.0574	0.5574	0.6148	1024.7	0.0038	6078	6048	99.51
urb	A2006353	MOD13Q1	250m_16_days_EVI	0.065	0.1742	0.1739	0.1717	-0.0653	0.5914	0.6567	1055.35	0.0042	6078	6067	99.82
urb	A2007001	MOD13Q1	250m_16_days_EVI	0.0645	0.1668	0.1764	0.1716	-0.0594	0.6416	0.701	1050.85	0.0042	6078	5958	98.03
urb	A2007017	MOD13Q1	250m_16_days_EVI	0.0617	0.1415	0.1668	0.1635	-0.0649	0.5226	0.5875	1013.51	0.0038	6078	6076	99.97
urb	A2007033	MOD13Q1	250m_16_days_EVI	0.0786	0.2049	0.1993	0.1933	-0.0502	0.7667	0.8169	1178.4	0.0062	6078	5912	97.27
urb	A2007049	MOD13Q1	250m_16_days_EVI	0.0927	0.1896	0.22	0.2057	-0.0683	0.7569	0.8252	1299.63	0.0086	6078	5908	97.2
urb	A2007065	MOD13Q1	250m_16_days_EVI	0.1024	0.2151	0.2472	0.2304	-0.0699	0.8243	0.8942	1487.67	0.0105	6078	6018	99.01
urb	A2007081	MOD13Q1	250m_16_days_EVI	0.0976	0.2057	0.24	0.2268	-0.0635	0.844	0.9075	1420.75	0.0095	6078	5919	97.38
urb	A2007097	MOD13Q1	250m_16_days_EVI	0.0881	0.2613	0.2413	0.2326	-0.0661	0.9449	1.011	1446.67	0.0078	6078	5995	98.63
urb	A2007113	MOD13Q1	250m_16_days_EVI	0.0879	0.2284	0.2328	0.2278	-0.0629	0.8569	0.9198	1396.26	0.0077	6078	5998	98.68
urb	A2007129	MOD13Q1	250m_16_days_EVI	0.0837	0.2138	0.2203	0.2141	-0.0758	0.9816	1.0574	1319.64	0.007	6078	5990	98.55
urb	A2007145	MOD13Q1	250m_16_days_EVI	0.0847	0.168	0.2146	0.2078	-0.0673	0.8178	0.8851	1293.37	0.0072	6078	6028	99.18
urb	A2007161	MOD13Q1	250m_16_days_EVI	0.0852	0.1972	0.2165	0.2087	-0.0791	0.8481	0.9272	1301.82	0.0073	6078	6013	98.93
urb	A2007177	MOD13Q1	250m_16_days_EVI	0.0855	0.1901	0.2138	0.2041	-0.097	0.8192	0.9162	1256.57	0.0073	6078	5876	96.68
urb	A2007193	MOD13Q1	250m_16_days_EVI	0.0946	0.2212	0.2183	0.2049	-0.0834	0.8708	0.9542	1303.17	0.009	6078	5971	98.24
urb	A2007209	MOD13Q1	250m_16_days_EVI	0.089	0.1608	0.2121	0.2008	-0.0812	0.9012	0.9824	1279.38	0.0079	6078	6033	99.26
urb	A2007225	MOD13Q1	250m_16_days_EVI	0.0944	0.188	0.2138	0.1994	-0.0755	0.822	0.8975	1285.37	0.0089	6078	6013	98.93
urb	A2007241	MOD13Q1	250m_16_days_EVI	0.0896	0.2123	0.2057	0.1944	-0.0657	0.9302	0.9959	1248.6	0.008	6078	6070	99.87
urb	A2007257	MOD13Q1	250m_16_days_EVI	0.0827	0.1712	0.1996	0.1894	-0.0527	0.8364	0.8891	1205.74	0.0068	6078	6041	99.39
urb	A2007273	MOD13Q1	250m_16_days_EVI	0.0878	0.1936	0.1985	0.1876	-0.0697	0.8566	0.9263	1201.74	0.0077	6078	6055	99.62
urb	A2007289	MOD13Q1	250m_16_days_EVI	0.0784	0.1733	0.1926	0.1854	-0.0511	0.8649	0.916	1167.28	0.0061	6078	6062	99.74
urb	A2007305	MOD13Q1	250m_16_days_EVI	0.0712	0.1875	0.1868	0.1837	-0.0501	0.6396	0.6897	1122.03	0.0051	6078	6008	98.85
urb	A2007321	MOD13Q1	250m_16_days_EVI	0.0695	0.1992	0.1948	0.1924	-0.0711	0.6472	0.7183	1181.64	0.0048	6078	6067	99.82
urb	A2007337	MOD13Q1	250m_16_days_EVI	0.0675	0.1624	0.1751	0.1707	-0.0566	0.6745	0.7311	1060.19	0.0046	6078	6055	99.62
urb	A2007353	MOD13Q1	250m_16_days_EVI	0.0677	0.1663	0.1784	0.1746	-0.0583	0.6116	0.6699	1063.73	0.0046	6078	5961	98.08
urb	A2008001	MOD13Q1	250m_16_days_EVI	0.0783	0.1829	0.1916	0.1879	-0.0636	0.5543	0.6179	1154.9	0.0061	6078	6027	99.16
urb	A2008017	MOD13Q1	250m_16_days_EVI	0.0797	0.2035	0.1876	0.1787	-0.0602	0.6489	0.7091	1134.97	0.0063	6078	6050	99.54
urb	A2008033	MOD13Q1	250m_16_days_EVI	0.092	0.1898	0.2144	0.1999	-0.0781	0.7062	0.7843	1300.52	0.0085	6078	6067	99.82
urb	A2008049	MOD13Q1	250m_16_days_EVI	0.1155	0.234	0.2505	0.2318	-0.0618	0.8556	0.9174	1515.37	0.0133	6078	6049	99.52
urb	A2008065	MOD13Q1	250m_16_days_EVI	0.1201	0.2508	0.2605	0.2352	-0.0552	0.8933	0.9485	1579.86	0.0144	6078	6065	99.79
urb	A2008081	MOD13Q1	250m_16_days_EVI	0.1187	0.2474	0.2677	0.2443	-0.0601	0.8589	0.919	1626.82	0.0141	6078	6076	99.97
urb	A2008097	MOD13Q1	250m_16_days_EVI	0.1024	0.2542	0.2538	0.2367	-0.0656	0.8158	0.8814	1538.32	0.0105	6078	6060	99.7
urb	A2008113	MOD13Q1	250m_16_days_EVI	0.0907	0.2669	0.239	0.229	-0.0713	0.846	0.9173	1448.86	0.0082	6078	6063	99.75
urb	A2008129	MOD13Q1	250m_16_days_EVI	0.0816	0.222	0.2256	0.2214	-0.0708	0.8271	0.8979	1368.72	0.0067	6078	6067	99.82
urb	A2008145	MOD13Q1	250m_16_days_EVI	0.0842	0.2112	0.2243	0.218	-0.0979	0.8535	0.9514	1359.93	0.0071	6078	6062	99.74
urb	A2008161	MOD13Q1	250m_16_days_EVI	0.086	0.2074	0.2203	0.2115	-0.0758	0.8534	0.9292	1335.09	0.0074	6078	6059	99.69
urb	A2008177	MOD13Q1	250m_16_days_EVI	0.0864	0.2317	0.2196	0.2121	-0.1019	0.9003	1.0022	1331.06	0.0075	6078	6060	99.7
urb	A2008193	MOD13Q1	250m_16_days_EVI	0.0906	0.2082	0.2216	0.2124	-0.0905	0.8448	0.9353	1340.25	0.0082	6078	6047	99.49
urb	A2008209	MOD13Q1	250m_16_days_EVI	0.0975	0.2355	0.2198	0.2043	-0.0837	0.8895	0.9732	1331.88	0.0095	6078	6060	99.7
urb	A2008225	MOD13Q1	250m_16_days_EVI	0.0923	0.1955	0.2111	0.1978	-0.0738	0.8528	0.9266	1277.75	0.0085	6078	6053	99.59
urb	A2008241	MOD13Q1	250m_16_days_EVI	0.0879	0.1752	0.2057	0.1925	-0.06	0.8675	0.9275	1247.81	0.0077	6078	6065	99.79
urb	A2008257	MOD13Q1	250m_16_days_EVI	0.0844	0.1709	0.2009	0.1901	-0.0661	0.9043	0.9704	1219.74	0.0071	6078	6071	99.88
urb	A2008273	MOD13Q1	250m_16_days_EVI	0.0818	0.1865	0.1957	0.1859	-0.042	0.9394	0.9814	1189.72	0.0067	6078	6078	100
urb	A2008289	MOD13Q1	250m_16_days_EVI	0.0715	0.1744	0.1896	0.1824	-0.0618	0.6907	0.7525	1149.19	0.0051	6078	6060	99.7
urb	A2008305	MOD13Q1	250m_16_days_EVI	0.0756	0.1778	0.1856	0.18	-0.0372	0.7203	0.7575	1122.21	0.0057	6078	6045	99.46
urb	A2008321	MOD13Q1	250m_16_days_EVI	0.0734	0.1841	0.1862	0.1824	-0.0607	0.6806	0.7413	1127.09	0.0054	6078	6054	99.61
urb	A2008337	MOD13Q1	250m_16_days_EVI	0.0672	0.1546	0.1793	0.1787	-0.0705	0.6083	0.6788	1087.39	0.0045	6078	6063	99.75
urb	A2008353	MOD13Q1	250m_16_days_EVI	0.0676	0.1502	0.1816	0.181	-0.0629	0.5484	0.6113	1097.33	0.0046	6078	6043	99.42
urb	A2009001	MOD13Q1	250m_16_days_EVI	0.0653	0.1874	0.1736	0.1707	-0.0591	0.5892	0.6483	1043.11	0.0043	6078	6010	98.88
urb	A2009017	MOD13Q1	250m_16_days_EVI	0.0694	0.1807	0.1878	0.1822	-0.065	0.5636	0.6286	1137.4	0.0048	6078	6058	99.67
urb	A2009033	MOD13Q1	250m_16_days_EVI	0.08	0.1526	0.1928	0.1876	-0.0596	0.7492	0.8088	1167.27	0.0064	6078	6055	99.62
urb	A2009049	MOD13Q1	250m_16_days_EVI	0.0924	0.2176	0.2043	0.1964	-0.0864	0.7662	0.8526	1217.09	0.0085	6078	5956	97.99
urb	A2009065	MOD13Q1	250m_16_days_EVI	0.1061	0.2005	0.2358	0.2181	-0.0669	0.8724	0.9393	1429.91	0.0113	6078	6065	99.79
urb	A2009081	MOD13Q1	250m_16_days_EVI	0.1068	0.1986	0.254	0.2343	-0.0617	0.9158	0.9775	1532.89	0.0114	6078	6035	99.29
urb	A2009097	MOD13Q1	250m_16_days_EVI	0.1001	0.2122	0.2446	0.2318	-0.0595	0.9686	1.0281	1483.11	0.01	6078	6064	99.77
urb	A2009113	MOD13Q1	250m_16_days_EVI	0.0909	0.2561	0.2349	0.2277	-0.0802	0.8266	0.9068	1418.96	0.0083	6078	6040	99.37
urb	A2009129	MOD13Q1	250m_16_days_EVI	0.0794	0.225	0.2203	0.2164	-0.0658	0.8508	0.9166	1334.08	0.0063	6078	6057	99.65
urb	A2009145	MOD13Q1	250m_16_days_EVI	0.0795	0.2096	0.21	0.2053	-0.0702	0.8396	0.9098	1268.91	0.0063	6078	6041	99.39
urb	A2009161	MOD13Q1	250m_16_days_EVI	0.0813	0.1907	0.2094	0.202	-0.0827	0.8369	0.9196	1269.53	0.0066	6078	6062	99.74
urb	A2009177	MOD13Q1	250m_16_days_EVI	0.0849	0.1973	0.2111	0.2012	-0.0937	0.9034	0.9971	1276.09	0.0072	6078	6044	99.44
urb	A2009193	MOD13Q1	250m_16_days_EVI	0.0883	0.1781	0.2087	0.198	-0.0682	0.814	0.8822	1264.44	0.0078	6078	6058	99.67
urb	A2009209	MOD13Q1	250m_16_days_EVI	0.0893	0.1871	0.2082	0.1965	-0.0702	0.7954	0.8656	1255.83	0.008	6078	6033	99.26
urb	A2009225	MOD13Q1	250m_16_days_EVI	0.0892	0.1854	0.2052	0.1935	-0.071	0.8831	0.9541	1244.05	0.0079	6078	6063	99.75
urb	A2009241	MOD13Q1	250m_16_days_EVI	0.0843	0.184	0.2	0.1886	-0.0571	0.9244	0.9815	1210.08	0.0071	6078	6050	99.54
urb	A2009257	MOD13Q1	250m_16_days_EVI	0.0864	0.1612	0.1963	0.186	-0.0662	0.9519	1.0181	1191.11	0.0075	6078	6069	99.85
urb	A2009273	MOD13Q1	250m_16_days_EVI	0.0735	0.1434	0.1774	0.1709	-0.0691	0.7754	0.8445	1075.81	0.0054	6078	6065	99.79
urb	A2009289	MOD13Q1	250m_16_days_EVI	0.0797	0.1732	0.2088	0.2019	-0.0462	0.8177	0.8639	1267.05	0.0063	6078	6067	99.82
urb	A2009305	MOD13Q1	250m_16_days_EVI	0.0813	0.2195	0.2133	0.2082	-0.0521	0.7936	0.8457	1294.03	0.0066	6078	6066	99.8
urb	A2009321	MOD13Q1	250m_16_days_EVI	0.0767	0.2238	0.2127	0.2075	-0.0603	0.7107	0.771	1291.04	0.0059	6078	6069	99.85
urb	A2009337	MOD13Q1	250m_16_days_EVI	0.0742	0.1738	0.1854	0.1826	-0.0666	0.5818	0.6484	1115.73	0.0055	6078	6018	99.01
urb	A2009353	MOD13Q1	250m_16_days_EVI	0.0799	0.2069	0.1894	0.1806	-0.0561	0.5657	0.6218	1143.89	0.0064	6078	6040	99.37
urb	A2010001	MOD13Q1	250m_16_days_EVI	0.0922	0.1993	0.2296	0.2207	-0.0563	0.6244	0.6807	1383.53	0.0085	6078	6027	99.16
urb	A2010017	MOD13Q1	250m_16_days_EVI	0.104	0.2023	0.2371	0.2217	-0.0567	0.7343	0.791	1423.03	0.0108	6078	6001	98.73
urb	A2010033	MOD13Q1	250m_16_days_EVI	0.1133	0.1909	0.2541	0.2368	-0.0684	0.8511	0.9195	1542.74	0.0128	6078	6071	99.88
urb	A2010049	MOD13Q1	250m_16_days_EVI	0.122	0.2212	0.2623	0.2413	-0.0624	0.8576	0.92	1552.7	0.0149	6078	5920	97.4
urb	A2010065	MOD13Q1	250m_16_days_EVI	0.1267	0.19	0.2649	0.2326	-0.0805	0.9037	0.9842	1604.8	0.016	6078	6059	99.69
urb	A2010081	MOD13Q1	250m_16_days_EVI	0.1198	0.2595	0.2713	0.246	-0.0562	0.9057	0.9619	1644.69	0.0144	6078	6063	99.75
urb	A2010097	MOD13Q1	250m_16_days_EVI	0.1203	0.2232	0.2723	0.2465	-0.0606	0.8015	0.8621	1652.56	0.0145	6078	6068	99.84
urb	A2010113	MOD13Q1	250m_16_days_EVI	0.1089	0.2469	0.271	0.2517	-0.0694	0.8345	0.9039	1645.23	0.0119	6078	6070	99.87
urb	A2010129	MOD13Q1	250m_16_days_EVI	0.0954	0.229	0.2544	0.2467	-0.0795	0.7952	0.8747	1537.6	0.0091	6078	6045	99.46
urb	A2010145	MOD13Q1	250m_16_days_EVI	0.0877	0.2204	0.2386	0.2316	-0.0991	0.8473	0.9464	1439.55	0.0077	6078	6034	99.28
urb	A2010161	MOD13Q1	250m_16_days_EVI	0.0815	0.2259	0.2275	0.2223	-0.1038	0.8012	0.905	1379.96	0.0066	6078	6066	99.8
urb	A2010177	MOD13Q1	250m_16_days_EVI	0.1079	0.178	0.2817	0.2513	-0.0662	0.8714	0.9376	1711.29	0.0116	6078	6075	99.95
urb	A2010193	MOD13Q1	250m_16_days_EVI	0.0869	0.2188	0.2231	0.2137	-0.0816	0.8127	0.8943	1350.6	0.0076	6078	6054	99.61
urb	A2010209	MOD13Q1	250m_16_days_EVI	0.09	0.1847	0.2209	0.2089	-0.0748	0.7742	0.849	1338.86	0.0081	6078	6060	99.7
urb	A2010225	MOD13Q1	250m_16_days_EVI	0.0942	0.2038	0.2165	0.2033	-0.0702	0.8853	0.9555	1314.32	0.0089	6078	6072	99.9
urb	A2010241	MOD13Q1	250m_16_days_EVI	0.0864	0.1887	0.2098	0.1977	-0.0473	0.7736	0.8209	1275.38	0.0075	6078	6078	100
urb	A2010257	MOD13Q1	250m_16_days_EVI	0.0849	0.1845	0.2037	0.1922	-0.0513	0.7911	0.8424	1233.99	0.0072	6078	6059	99.69
urb	A2010273	MOD13Q1	250m_16_days_EVI	0.0778	0.183	0.1956	0.1866	-0.0433	0.7429	0.7862	1188.5	0.0061	6078	6075	99.95
urb	A2010289	MOD13Q1	250m_16_days_EVI	0.0783	0.1771	0.1824	0.1772	-0.0482	0.7912	0.8394	1106.97	0.0061	6078	6069	99.85
urb	A2010305	MOD13Q1	250m_16_days_EVI	0.076	0.1921	0.1851	0.1801	-0.0435	0.718	0.7615	1121.25	0.0058	6078	6056	99.64
urb	A2010321	MOD13Q1	250m_16_days_EVI	0.0715	0.177	0.1783	0.1758	-0.0465	0.7473	0.7938	1081.29	0.0051	6078	6064	99.77
urb	A2010337	MOD13Q1	250m_16_days_EVI	0.0699	0.1899	0.1941	0.1925	-0.0474	0.6585	0.7059	1177.02	0.0049	6078	6065	99.79
urb	A2010353	MOD13Q1	250m_16_days_EVI	0.0765	0.1851	0.1873	0.1833	-0.1901	0.7234	0.9135	1136.37	0.0058	6078	6066	99.8
urb	A2011001	MOD13Q1	250m_16_days_EVI	0.0787	0.1677	0.188	0.1841	-0.0644	0.7936	0.858	1113.25	0.0062	6078	5923	97.45
urb	A2011017	MOD13Q1	250m_16_days_EVI	0.0909	0.1787	0.2007	0.1877	-0.0629	0.8061	0.869	1214.8	0.0083	6078	6054	99.61
urb	A2011033	MOD13Q1	250m_16_days_EVI	0.0948	0.1766	0.2249	0.2111	-0.0547	0.807	0.8617	1358.54	0.009	6078	6041	99.39
urb	A2011049	MOD13Q1	250m_16_days_EVI	0.1019	0.2097	0.2242	0.2089	-0.0526	0.8918	0.9444	1360.43	0.0104	6078	6068	99.84
urb	A2011065	MOD13Q1	250m_16_days_EVI	0.1084	0.2028	0.2285	0.2115	-0.0586	0.9513	1.0099	1378.98	0.0118	6078	6036	99.31
urb	A2011081	MOD13Q1	250m_16_days_EVI	0.119	0.2026	0.2692	0.2495	-0.0758	0.8644	0.9402	1629.45	0.0142	6078	6053	99.59
urb	A2011097	MOD13Q1	250m_16_days_EVI	0.1127	0.2254	0.2608	0.241	-0.0725	0.9676	1.0401	1572.76	0.0127	6078	6030	99.21
urb	A2011113	MOD13Q1	250m_16_days_EVI	0.0974	0.2328	0.2575	0.2418	-0.0515	0.9126	0.9641	1553.45	0.0095	6078	6033	99.26
urb	A2011129	MOD13Q1	250m_16_days_EVI	0.0844	0.2072	0.2365	0.2298	-0.0792	0.7862	0.8654	1436.22	0.0071	6078	6073	99.92
urb	A2011145	MOD13Q1	250m_16_days_EVI	0.0846	0.2374	0.2245	0.2228	-0.0874	0.8114	0.8988	1361.48	0.0072	6078	6064	99.77
urb	A2011161	MOD13Q1	250m_16_days_EVI	0.085	0.2005	0.2258	0.2192	-0.0939	0.9054	0.9993	1365.05	0.0072	6078	6046	99.47
urb	A2011177	MOD13Q1	250m_16_days_EVI	0.0884	0.2081	0.2279	0.2182	-0.0761	0.8044	0.8805	1382.16	0.0078	6078	6066	99.8
urb	A2011193	MOD13Q1	250m_16_days_EVI	0.0922	0.2027	0.2296	0.2192	-0.1041	0.781	0.8851	1392.3	0.0085	6078	6064	99.77
urb	A2011209	MOD13Q1	250m_16_days_EVI	0.095	0.2025	0.2252	0.2131	-0.0726	0.8308	0.9034	1367.8	0.009	6078	6073	99.92
urb	A2011225	MOD13Q1	250m_16_days_EVI	0.0937	0.2071	0.2184	0.2063	-0.067	0.8118	0.8788	1324.3	0.0088	6078	6065	99.79
urb	A2011241	MOD13Q1	250m_16_days_EVI	0.0904	0.1718	0.2128	0.1996	-0.0678	0.7807	0.8485	1292.57	0.0082	6078	6075	99.95
urb	A2011257	MOD13Q1	250m_16_days_EVI	0.0839	0.2068	0.2034	0.1917	-0.0498	0.7279	0.7777	1230.2	0.007	6078	6049	99.52
urb	A2011273	MOD13Q1	250m_16_days_EVI	0.0848	0.1886	0.1996	0.1897	-0.0627	0.8032	0.8659	1208.51	0.0072	6078	6054	99.61
urb	A2011289	MOD13Q1	250m_16_days_EVI	0.0757	0.1772	0.1938	0.188	-0.0497	0.7552	0.8049	1171.63	0.0057	6078	6047	99.49
urb	A2011305	MOD13Q1	250m_16_days_EVI	0.0687	0.1881	0.1908	0.1895	-0.0552	0.7213	0.7765	1158.39	0.0047	6078	6070	99.87
urb	A2011321	MOD13Q1	250m_16_days_EVI	0.0676	0.2	0.178	0.1787	-0.0541	0.6017	0.6558	1078.04	0.0046	6078	6057	99.65
urb	A2011337	MOD13Q1	250m_16_days_EVI	0.0633	0.1652	0.1746	0.1741	-0.0525	0.5676	0.6201	1055.81	0.004	6078	6047	99.49
urb	A2011353	MOD13Q1	250m_16_days_EVI	0.0581	0.1661	0.1544	0.1509	-0.0576	0.5005	0.5581	935.766	0.0034	6078	6060	99.7
urb	A2012001	MOD13Q1	250m_16_days_EVI	0.0519	0.1449	0.1474	0.1453	-0.0558	0.4635	0.5193	895.096	0.0027	6078	6073	99.92
urb	A2012017	MOD13Q1	250m_16_days_EVI	0.0548	0.147	0.1501	0.1489	-0.0607	0.4868	0.5475	911.361	0.003	6078	6072	99.9
urb	A2012033	MOD13Q1	250m_16_days_EVI	0.0627	0.1457	0.1608	0.1549	-0.0549	0.5845	0.6394	974.045	0.0039	6078	6058	99.67
urb	A2012049	MOD13Q1	250m_16_days_EVI	0.0718	0.1648	0.1801	0.173	-0.0573	0.6691	0.7264	1086.98	0.0052	6078	6036	99.31
urb	A2012065	MOD13Q1	250m_16_days_EVI	0.0754	0.2077	0.1981	0.1939	-0.0635	0.7226	0.7861	1180.57	0.0057	6078	5958	98.03
urb	A2012081	MOD13Q1	250m_16_days_EVI	0.0887	0.1648	0.2123	0.2019	-0.0614	0.7069	0.7683	1282.3	0.0079	6078	6040	99.37
urb	A2012097	MOD13Q1	250m_16_days_EVI	0.1044	0.2399	0.2422	0.2284	-0.0704	0.8332	0.9036	1445.97	0.0109	6078	5970	98.22
urb	A2012113	MOD13Q1	250m_16_days_EVI	0.0974	0.2421	0.2363	0.2251	-0.0899	0.819	0.9089	1431.05	0.0095	6078	6056	99.64
urb	A2012129	MOD13Q1	250m_16_days_EVI	0.0899	0.22	0.2372	0.2287	-0.0654	0.7588	0.8242	1432.89	0.0081	6078	6042	99.41
urb	A2012145	MOD13Q1	250m_16_days_EVI	0.083	0.2269	0.2207	0.215	-0.08	0.8658	0.9458	1336.56	0.0069	6078	6057	99.65
urb	A2012161	MOD13Q1	250m_16_days_EVI	0.0834	0.1546	0.219	0.2122	-0.0678	0.8103	0.8781	1324.04	0.007	6078	6047	99.49
urb	A2012177	MOD13Q1	250m_16_days_EVI	0.0907	0.2205	0.2208	0.2101	-0.0846	0.9413	1.0259	1337.45	0.0082	6078	6057	99.65
urb	A2012193	MOD13Q1	250m_16_days_EVI	0.09	0.2132	0.2179	0.2068	-0.0723	0.8134	0.8857	1324.62	0.0081	6078	6078	100
urb	A2012209	MOD13Q1	250m_16_days_EVI	0.0923	0.1824	0.2128	0.2	-0.0716	0.8187	0.8903	1288.77	0.0085	6078	6056	99.64
urb	A2012225	MOD13Q1	250m_16_days_EVI	0.0933	0.2114	0.2098	0.197	-0.0653	0.8684	0.9337	1275.19	0.0087	6078	6077	99.98
urb	A2012241	MOD13Q1	250m_16_days_EVI	0.0861	0.1933	0.201	0.1895	-0.0572	0.8209	0.8781	1221.06	0.0074	6078	6076	99.97
urb	A2012257	MOD13Q1	250m_16_days_EVI	0.0871	0.1728	0.1961	0.1844	-0.0595	0.8442	0.9037	1189.87	0.0076	6078	6067	99.82
urb	A2012273	MOD13Q1	250m_16_days_EVI	0.0841	0.1693	0.193	0.182	-0.0523	0.8739	0.9262	1171.83	0.0071	6078	6072	99.9
urb	A2012289	MOD13Q1	250m_16_days_EVI	0.0753	0.166	0.1848	0.1768	-0.0537	0.7473	0.801	1123.4	0.0057	6078	6078	100
urb	A2012305	MOD13Q1	250m_16_days_EVI	0.0719	0.1825	0.1878	0.1832	-0.0594	0.7488	0.8082	1141.43	0.0052	6078	6078	100
urb	A2012321	MOD13Q1	250m_16_days_EVI	0.0728	0.1725	0.1827	0.1773	-0.0577	0.685	0.7427	1087.64	0.0053	6078	5952	97.93
urb	A2012337	MOD13Q1	250m_16_days_EVI	0.0811	0.171	0.1951	0.1884	-0.0619	0.6662	0.7281	1183.37	0.0066	6078	6067	99.82
urb	A2012353	MOD13Q1	250m_16_days_EVI	0.0832	0.1919	0.1934	0.1844	-0.0841	0.7448	0.8289	1162.27	0.0069	6078	6009	98.86
urb	A2013001	MOD13Q1	250m_16_days_EVI	0.0815	0.1864	0.1963	0.1855	-0.058	0.6495	0.7075	1184.12	0.0066	6078	6032	99.24
urb	A2013017	MOD13Q1	250m_16_days_EVI	0.0894	0.1497	0.2061	0.1928	-0.0572	0.765	0.8222	1252.43	0.008	6078	6077	99.98
urb	A2013033	MOD13Q1	250m_16_days_EVI	0.0963	0.2223	0.2194	0.2004	-0.0582	0.8874	0.9456	1303.83	0.0093	6078	5943	97.78
urb	A2013049	MOD13Q1	250m_16_days_EVI	0.109	0.1643	0.2312	0.208	-0.0668	0.8544	0.9212	1386.83	0.0119	6078	5999	98.7
urb	A2013065	MOD13Q1	250m_16_days_EVI	0.1171	0.1938	0.2446	0.2165	-0.0625	0.9415	1.004	1451.83	0.0137	6078	5935	97.65
urb	A2013081	MOD13Q1	250m_16_days_EVI	0.1117	0.1837	0.2464	0.225	-0.0497	0.8555	0.9052	1479.62	0.0125	6078	6005	98.8
urb	A2013097	MOD13Q1	250m_16_days_EVI	0.1043	0.2376	0.2523	0.2368	-0.0662	0.907	0.9732	1525.01	0.0109	6078	6044	99.44
urb	A2013113	MOD13Q1	250m_16_days_EVI	0.0803	0.2115	0.2268	0.2201	-0.0775	0.8112	0.8887	1368.67	0.0064	6078	6036	99.31
urb	A2013129	MOD13Q1	250m_16_days_EVI	0.0818	0.2131	0.2224	0.2156	-0.0973	0.862	0.9593	1325.68	0.0067	6078	5960	98.06
urb	A2013145	MOD13Q1	250m_16_days_EVI	0.0761	0.2189	0.2165	0.2097	-0.0609	0.7978	0.8587	1288.66	0.0058	6078	5953	97.94
urb	A2013161	MOD13Q1	250m_16_days_EVI	0.0852	0.1877	0.2162	0.2066	-0.0842	0.8595	0.9437	1305.35	0.0073	6078	6037	99.33
urb	A2013177	MOD13Q1	250m_16_days_EVI	0.0834	0.2025	0.2098	0.2007	-0.065	0.8064	0.8714	1275.15	0.007	6078	6078	100
urb	A2013193	MOD13Q1	250m_16_days_EVI	0.0878	0.1707	0.2086	0.1972	-0.0579	0.9318	0.9897	1266.26	0.0077	6078	6069	99.85
urb	A2013241	MOD13Q1	250m_16_days_EVI	0.0812	0.2022	0.1949	0.1847	-0.0551	0.8592	0.9143	1183.98	0.0066	6078	6075	99.95
urb	A2013257	MOD13Q1	250m_16_days_EVI	0.0831	0.1748	0.1971	0.1875	-0.0472	0.7845	0.8317	1196.51	0.0069	6078	6071	99.88
urb	A2013273	MOD13Q1	250m_16_days_EVI	0.0742	0.1792	0.1923	0.187	-0.0585	0.8616	0.9201	1168.57	0.0055	6078	6077	99.98
urb	A2013289	MOD13Q1	250m_16_days_EVI	0.0707	0.172	0.1822	0.1764	-0.0524	0.6671	0.7195	1083	0.005	6078	5945	97.81
urb	A2013305	MOD13Q1	250m_16_days_EVI	0.0662	0.1597	0.1672	0.1617	-0.0539	0.7198	0.7737	1008.95	0.0044	6078	6036	99.31
urb	A2013321	MOD13Q1	250m_16_days_EVI	0.0635	0.1478	0.1659	0.1645	-0.0629	0.6547	0.7176	999.889	0.004	6078	6027	99.16
urb	A2013337	MOD13Q1	250m_16_days_EVI	0.0595	0.1622	0.1623	0.158	-0.0625	0.6837	0.7462	984.24	0.0035	6078	6066	99.8
urb	A2013353	MOD13Q1	250m_16_days_EVI	0.0514	0.1402	0.1515	0.1489	-0.056	0.5213	0.5773	914.024	0.0026	6078	6033	99.26
urb	A2014001	MOD13Q1	250m_16_days_EVI	0.0504	0.1457	0.1479	0.1461	-0.0655	0.49	0.5555	898.369	0.0025	6078	6074	99.93
urb	A2014017	MOD13Q1	250m_16_days_EVI	0.0525	0.1582	0.1563	0.155	-0.056	0.5862	0.6422	946.477	0.0028	6078	6056	99.64
urb	A2014033	MOD13Q1	250m_16_days_EVI	0.0607	0.1851	0.1737	0.1771	-0.0644	0.7706	0.835	1052.91	0.0037	6078	6062	99.74

## Sheet: ndvi
land	date[YYYYDDD]	product	band	stddev	mode	mean	median	min	max	range	sum	variance	tot_pixels	pixels_pass_qa	per_cent_pixels_pass_qa
agr	A2000049	MOD13Q1	250m_16_days_NDVI	0.1877	0.5814	0.5713	0.5857	-0.1687	0.9347	1.1034	8243.28	0.0352	14429	14429	100
agr	A2000065	MOD13Q1	250m_16_days_NDVI	0.166	0.7639	0.6354	0.6588	-0.1948	0.9322	1.127	9166.22	0.0276	14429	14427	99.99
agr	A2000081	MOD13Q1	250m_16_days_NDVI	0.1742	0.8389	0.6423	0.6798	-0.0904	0.9365	1.0269	9266.88	0.0303	14429	14427	99.99
agr	A2000097	MOD13Q1	250m_16_days_NDVI	0.1759	0.6944	0.5934	0.6269	-0.1945	0.9331	1.1276	8562.63	0.031	14429	14429	100
agr	A2000113	MOD13Q1	250m_16_days_NDVI	0.1764	0.6318	0.5727	0.5963	-0.1944	0.9423	1.1367	8264.04	0.0311	14429	14429	100
agr	A2000129	MOD13Q1	250m_16_days_NDVI	0.1735	0.5625	0.5573	0.5718	-0.1736	0.931	1.1046	8041.87	0.0301	14429	14429	100
agr	A2000145	MOD13Q1	250m_16_days_NDVI	0.1727	0.5213	0.5479	0.5539	-0.1723	0.9213	1.0936	7905.74	0.0298	14429	14429	100
agr	A2000161	MOD13Q1	250m_16_days_NDVI	0.1774	0.55	0.5572	0.5755	-0.1886	0.9467	1.1353	8039.88	0.0315	14429	14429	100
agr	A2000177	MOD13Q1	250m_16_days_NDVI	0.1814	0.6852	0.5733	0.6012	-0.1992	0.9222	1.1214	8271.73	0.0329	14429	14429	100
agr	A2000193	MOD13Q1	250m_16_days_NDVI	0.1829	0.7082	0.5948	0.6328	-0.1928	0.9148	1.1076	8582.48	0.0335	14429	14429	100
agr	A2000209	MOD13Q1	250m_16_days_NDVI	0.178	0.711	0.5538	0.5822	-0.1996	0.9011	1.1007	7990.2	0.0317	14429	14429	100
agr	A2000225	MOD13Q1	250m_16_days_NDVI	0.1781	0.7098	0.5701	0.6028	-0.1899	0.9127	1.1026	8225.72	0.0317	14429	14429	100
agr	A2000241	MOD13Q1	250m_16_days_NDVI	0.1775	0.6056	0.5694	0.6	-0.1605	0.9117	1.0722	8215.17	0.0315	14429	14428	99.99
agr	A2000257	MOD13Q1	250m_16_days_NDVI	0.1789	0.5831	0.5427	0.5581	-0.1957	0.9224	1.1181	7830.65	0.032	14429	14429	100
agr	A2000273	MOD13Q1	250m_16_days_NDVI	0.1895	0.4687	0.4992	0.495	-0.1994	0.9288	1.1282	7202.38	0.0359	14429	14429	100
agr	A2000289	MOD13Q1	250m_16_days_NDVI	0.1943	0.5098	0.4841	0.4714	-0.1842	0.9277	1.1119	6984.38	0.0377	14429	14429	100
agr	A2000305	MOD13Q1	250m_16_days_NDVI	0.1765	0.699	0.5125	0.5109	-0.1834	0.9244	1.1078	7394.67	0.0312	14429	14429	100
agr	A2000321	MOD13Q1	250m_16_days_NDVI	0.1544	0.2954	0.444	0.4295	-0.1983	0.8925	1.0908	6404.73	0.0238	14429	14426	99.98
agr	A2000337	MOD13Q1	250m_16_days_NDVI	0.1488	0.4852	0.4716	0.4721	-0.1693	0.9218	1.0911	6804.24	0.0221	14429	14429	100
agr	A2000353	MOD13Q1	250m_16_days_NDVI	0.1373	0.5169	0.4585	0.4604	-0.1759	0.9012	1.0771	6615.14	0.0188	14429	14429	100
agr	A2001001	MOD13Q1	250m_16_days_NDVI	0.1533	0.5	0.4654	0.4672	-0.1972	0.9278	1.125	6715.54	0.0235	14429	14429	100
agr	A2001017	MOD13Q1	250m_16_days_NDVI	0.1532	0.5043	0.4836	0.4883	-0.1967	0.9203	1.117	6975.43	0.0235	14429	14424	99.97
agr	A2001033	MOD13Q1	250m_16_days_NDVI	0.1551	0.5529	0.504	0.511	-0.1962	0.9123	1.1085	7271.3	0.024	14429	14427	99.99
agr	A2001049	MOD13Q1	250m_16_days_NDVI	0.175	0.6215	0.5878	0.6046	-0.1801	0.9453	1.1254	8477.18	0.0306	14429	14421	99.94
agr	A2001065	MOD13Q1	250m_16_days_NDVI	0.165	0.7701	0.6605	0.6937	-0.1951	0.9446	1.1397	9530.58	0.0272	14429	14429	100
agr	A2001081	MOD13Q1	250m_16_days_NDVI	0.1471	0.7283	0.6971	0.7267	0.0588	0.9466	0.8878	10057.9	0.0216	14429	14429	100
agr	A2001097	MOD13Q1	250m_16_days_NDVI	0.1856	0.5522	0.5522	0.5648	-0.196	0.9252	1.1212	7967.62	0.0345	14429	14429	100
agr	A2001113	MOD13Q1	250m_16_days_NDVI	0.1811	0.7251	0.5747	0.5956	-0.1937	0.9245	1.1182	8290.97	0.0328	14429	14427	99.99
agr	A2001129	MOD13Q1	250m_16_days_NDVI	0.1667	0.5139	0.5017	0.4974	-0.1925	0.9099	1.1024	7238.05	0.0278	14429	14428	99.99
agr	A2001145	MOD13Q1	250m_16_days_NDVI	0.1766	0.4195	0.5122	0.5146	-0.1964	0.9153	1.1117	7390.06	0.0312	14429	14429	100
agr	A2001161	MOD13Q1	250m_16_days_NDVI	0.1663	0.4801	0.4553	0.4497	-0.193	0.9145	1.1075	6566.99	0.0277	14429	14422	99.95
agr	A2001177	MOD13Q1	250m_16_days_NDVI	0.1822	0.6305	0.5404	0.5619	-0.1806	0.9011	1.0817	7797.1	0.0332	14429	14429	100
agr	A2001193	MOD13Q1	250m_16_days_NDVI	0.1872	0.7355	0.5786	0.6178	-0.199	0.9103	1.1093	8348.63	0.035	14429	14429	100
agr	A2001209	MOD13Q1	250m_16_days_NDVI	0.195	0.6837	0.5854	0.6279	-0.193	0.9211	1.1141	8447.08	0.038	14429	14429	100
agr	A2001225	MOD13Q1	250m_16_days_NDVI	0.1896	0.7119	0.5743	0.6148	-0.1573	0.9203	1.0776	8286.14	0.036	14429	14428	99.99
agr	A2001241	MOD13Q1	250m_16_days_NDVI	0.1899	0.6681	0.5505	0.575	-0.1786	0.909	1.0876	7943.77	0.0361	14429	14429	100
agr	A2001257	MOD13Q1	250m_16_days_NDVI	0.1887	0.6345	0.5386	0.5503	-0.192	0.9254	1.1174	7771.04	0.0356	14429	14429	100
agr	A2001273	MOD13Q1	250m_16_days_NDVI	0.1908	0.3857	0.4937	0.4877	-0.1881	0.9311	1.1192	7123.23	0.0364	14429	14429	100
agr	A2001289	MOD13Q1	250m_16_days_NDVI	0.1848	0.2462	0.4459	0.4303	-0.1584	0.916	1.0744	6434.12	0.0342	14429	14429	100
agr	A2001305	MOD13Q1	250m_16_days_NDVI	0.1787	0.26	0.4234	0.3971	-0.1475	0.9067	1.0542	6107.01	0.0319	14429	14425	99.97
agr	A2001321	MOD13Q1	250m_16_days_NDVI	0.1622	0.3568	0.4532	0.4385	-0.1996	0.8991	1.0987	6538.15	0.0263	14429	14428	99.99
agr	A2001337	MOD13Q1	250m_16_days_NDVI	0.1655	0.3867	0.4803	0.4788	-0.1689	0.906	1.0749	6930.13	0.0274	14429	14428	99.99
agr	A2001353	MOD13Q1	250m_16_days_NDVI	0.125	0.6195	0.5468	0.5559	-0.1918	0.8781	1.0699	7810.33	0.0156	14429	14285	99
agr	A2002001	MOD13Q1	250m_16_days_NDVI	0.1586	0.4408	0.5374	0.5453	-0.1977	0.9194	1.1171	7749.57	0.0252	14429	14420	99.94
agr	A2002017	MOD13Q1	250m_16_days_NDVI	0.1544	0.601	0.5358	0.5409	-0.1723	0.9236	1.0959	7729.53	0.0238	14429	14426	99.98
agr	A2002033	MOD13Q1	250m_16_days_NDVI	0.1611	0.4315	0.5259	0.5249	-0.198	0.9226	1.1206	7587.7	0.0259	14429	14427	99.99
agr	A2002049	MOD13Q1	250m_16_days_NDVI	0.1796	0.7372	0.6252	0.6615	-0.1904	0.9527	1.1431	9020.95	0.0323	14429	14429	100
agr	A2002065	MOD13Q1	250m_16_days_NDVI	0.1866	0.7789	0.648	0.6972	-0.1699	0.9505	1.1204	9349.86	0.0348	14429	14429	100
agr	A2002081	MOD13Q1	250m_16_days_NDVI	0.1909	0.8647	0.6512	0.702	-0.1687	0.9424	1.1111	9396.75	0.0365	14429	14429	100
agr	A2002097	MOD13Q1	250m_16_days_NDVI	0.1836	0.7044	0.5901	0.6214	-0.189	0.9298	1.1188	8514.44	0.0337	14429	14429	100
agr	A2002113	MOD13Q1	250m_16_days_NDVI	0.1531	0.6625	0.6067	0.6227	-0.1979	0.9211	1.119	8754.19	0.0234	14429	14429	100
agr	A2002129	MOD13Q1	250m_16_days_NDVI	0.1782	0.5662	0.5375	0.5443	-0.1808	0.9277	1.1085	7755.77	0.0317	14429	14429	100
agr	A2002145	MOD13Q1	250m_16_days_NDVI	0.1852	0.5232	0.5213	0.5254	-0.1652	0.931	1.0962	7521.98	0.0343	14429	14429	100
agr	A2002161	MOD13Q1	250m_16_days_NDVI	0.1837	0.6007	0.5405	0.558	-0.1906	0.9267	1.1173	7799.5	0.0338	14429	14429	100
agr	A2002177	MOD13Q1	250m_16_days_NDVI	0.1866	0.5963	0.5501	0.5781	-0.1677	0.9235	1.0912	7935.89	0.0348	14429	14426	99.98
agr	A2002193	MOD13Q1	250m_16_days_NDVI	0.1861	0.6441	0.5617	0.5943	-0.1681	0.9169	1.085	8104.73	0.0346	14429	14429	100
agr	A2002209	MOD13Q1	250m_16_days_NDVI	0.1881	0.7508	0.5761	0.6199	-0.1514	0.902	1.0534	8309.71	0.0354	14429	14425	99.97
agr	A2002225	MOD13Q1	250m_16_days_NDVI	0.1821	0.6027	0.5367	0.5599	-0.1982	0.9104	1.1086	7743.85	0.0332	14429	14429	100
agr	A2002241	MOD13Q1	250m_16_days_NDVI	0.18	0.699	0.5728	0.6083	-0.1218	0.9117	1.0335	8264.28	0.0324	14429	14429	100
agr	A2002257	MOD13Q1	250m_16_days_NDVI	0.1872	0.4578	0.5367	0.5492	-0.1955	0.9279	1.1234	7743.33	0.035	14429	14429	100
agr	A2002273	MOD13Q1	250m_16_days_NDVI	0.1813	0.5088	0.4752	0.4651	-0.1953	0.9146	1.1099	6856.83	0.0329	14429	14429	100
agr	A2002289	MOD13Q1	250m_16_days_NDVI	0.1809	0.3555	0.4505	0.4353	-0.1987	0.9092	1.1079	6498.35	0.0327	14429	14426	99.98
agr	A2002305	MOD13Q1	250m_16_days_NDVI	0.1694	0.2385	0.3847	0.3475	-0.1615	0.9172	1.0787	5525.36	0.0287	14429	14361	99.53
agr	A2002321	MOD13Q1	250m_16_days_NDVI	0.1665	0.4206	0.4354	0.4145	-0.1979	0.8873	1.0852	6282.99	0.0277	14429	14429	100
agr	A2002337	MOD13Q1	250m_16_days_NDVI	0.16	0.3309	0.4498	0.4399	-0.1443	0.8799	1.0242	6489.29	0.0256	14429	14428	99.99
agr	A2002353	MOD13Q1	250m_16_days_NDVI	0.1715	0.2383	0.4504	0.4513	-0.1938	0.9205	1.1143	6498.22	0.0294	14429	14427	99.99
agr	A2003001	MOD13Q1	250m_16_days_NDVI	0.1564	0.5752	0.4852	0.4811	-0.1852	0.9303	1.1155	6961.44	0.0245	14429	14349	99.45
agr	A2003017	MOD13Q1	250m_16_days_NDVI	0.16	0.6278	0.6054	0.6253	-0.1989	0.9373	1.1362	8114.94	0.0256	14429	13405	92.9
agr	A2003033	MOD13Q1	250m_16_days_NDVI	0.1599	0.7565	0.631	0.6571	-0.169	0.922	1.091	9104.65	0.0256	14429	14429	100
agr	A2003049	MOD13Q1	250m_16_days_NDVI	0.1747	0.725	0.6541	0.6944	-0.1984	0.9387	1.1371	9437.7	0.0305	14429	14429	100
agr	A2003065	MOD13Q1	250m_16_days_NDVI	0.1699	0.838	0.678	0.7236	-0.1759	0.9632	1.1391	9782.81	0.0289	14429	14429	100
agr	A2003081	MOD13Q1	250m_16_days_NDVI	0.1874	0.7735	0.6546	0.7106	-0.1966	0.9414	1.138	9441.81	0.0351	14429	14423	99.96
agr	A2003097	MOD13Q1	250m_16_days_NDVI	0.1888	0.7993	0.6098	0.6473	-0.1588	0.9295	1.0883	8798.76	0.0356	14429	14429	100
agr	A2003113	MOD13Q1	250m_16_days_NDVI	0.1918	0.6556	0.565	0.5906	-0.1994	0.9338	1.1332	8149.35	0.0368	14429	14424	99.97
agr	A2003129	MOD13Q1	250m_16_days_NDVI	0.1709	0.6392	0.5585	0.5774	-0.1928	0.9252	1.118	8058.37	0.0292	14429	14429	100
agr	A2003145	MOD13Q1	250m_16_days_NDVI	0.1746	0.4783	0.5146	0.5104	-0.1787	0.9325	1.1112	7425.2	0.0305	14429	14429	100
agr	A2003161	MOD13Q1	250m_16_days_NDVI	0.1706	0.5878	0.5192	0.5295	-0.1982	0.9143	1.1125	7491.33	0.0291	14429	14429	100
agr	A2003177	MOD13Q1	250m_16_days_NDVI	0.185	0.5819	0.5572	0.5868	-0.1869	0.9268	1.1137	8040.44	0.0342	14429	14429	100
agr	A2003193	MOD13Q1	250m_16_days_NDVI	0.1892	0.779	0.5697	0.6126	-0.1561	0.9159	1.072	8220.36	0.0358	14429	14429	100
agr	A2003209	MOD13Q1	250m_16_days_NDVI	0.1953	0.7677	0.581	0.6247	-0.152	0.924	1.076	8383.12	0.0381	14429	14429	100
agr	A2003225	MOD13Q1	250m_16_days_NDVI	0.1914	0.695	0.5892	0.6351	-0.193	0.9179	1.1109	8501.56	0.0366	14429	14429	100
agr	A2003241	MOD13Q1	250m_16_days_NDVI	0.1871	0.614	0.5482	0.5768	-0.1954	0.9174	1.1128	7909.86	0.035	14429	14429	100
agr	A2003257	MOD13Q1	250m_16_days_NDVI	0.1865	0.7629	0.5252	0.5395	-0.1694	0.9112	1.0806	7578.82	0.0348	14429	14429	100
agr	A2003273	MOD13Q1	250m_16_days_NDVI	0.1836	0.4974	0.479	0.4721	-0.196	0.9233	1.1193	6911.91	0.0337	14429	14429	100
agr	A2003289	MOD13Q1	250m_16_days_NDVI	0.1748	0.4391	0.4459	0.4317	-0.1939	0.9031	1.097	6430.21	0.0305	14429	14422	99.95
agr	A2003305	MOD13Q1	250m_16_days_NDVI	0.1829	0.2148	0.4371	0.4098	-0.1889	0.9191	1.108	6265.19	0.0334	14429	14333	99.33
agr	A2003321	MOD13Q1	250m_16_days_NDVI	0.1762	0.3333	0.4254	0.3961	-0.1974	0.9054	1.1028	6116.93	0.031	14429	14379	99.65
agr	A2003337	MOD13Q1	250m_16_days_NDVI	0.1557	0.3333	0.4703	0.4659	-0.169	0.8807	1.0497	6784.6	0.0242	14429	14427	99.99
agr	A2003353	MOD13Q1	250m_16_days_NDVI	0.1568	0.6666	0.4882	0.4912	-0.1677	0.9162	1.0839	7040.38	0.0246	14429	14421	99.94
agr	A2004001	MOD13Q1	250m_16_days_NDVI	0.1557	0.4624	0.48	0.4809	-0.1633	0.9162	1.0795	6922.25	0.0242	14429	14421	99.94
agr	A2004017	MOD13Q1	250m_16_days_NDVI	0.165	0.539	0.5396	0.5405	-0.1988	0.9293	1.1281	7775.67	0.0272	14429	14409	99.86
agr	A2004033	MOD13Q1	250m_16_days_NDVI	0.1625	0.6474	0.5929	0.6016	-0.1443	0.9381	1.0824	8555.61	0.0264	14429	14429	100
agr	A2004049	MOD13Q1	250m_16_days_NDVI	0.1712	0.8044	0.6528	0.6871	-0.1812	0.929	1.1102	9418.34	0.0293	14429	14427	99.99
agr	A2004065	MOD13Q1	250m_16_days_NDVI	0.1614	0.8143	0.6984	0.7419	-0.1589	0.9391	1.098	10077.9	0.0261	14429	14429	100
agr	A2004081	MOD13Q1	250m_16_days_NDVI	0.1893	0.4506	0.6365	0.6799	-0.1761	0.9363	1.1124	9183.92	0.0358	14429	14429	100
agr	A2004097	MOD13Q1	250m_16_days_NDVI	0.179	0.6616	0.5334	0.5469	-0.1842	0.932	1.1162	7696	0.032	14429	14429	100
agr	A2004113	MOD13Q1	250m_16_days_NDVI	0.1842	0.658	0.5435	0.5645	-0.1901	0.9259	1.116	7841.57	0.0339	14429	14429	100
agr	A2004129	MOD13Q1	250m_16_days_NDVI	0.1737	0.3772	0.4776	0.4687	-0.18	0.9249	1.1049	6891.65	0.0302	14429	14429	100
agr	A2004145	MOD13Q1	250m_16_days_NDVI	0.1861	0.3303	0.5099	0.5071	-0.1468	0.9268	1.0736	7356.4	0.0346	14429	14426	99.98
agr	A2004161	MOD13Q1	250m_16_days_NDVI	0.1984	0.5806	0.5006	0.5204	-0.1969	0.9333	1.1302	7222.56	0.0394	14429	14428	99.99
agr	A2004177	MOD13Q1	250m_16_days_NDVI	0.2034	0.6893	0.539	0.5738	-0.1988	0.9254	1.1242	7777.43	0.0414	14429	14429	100
agr	A2004193	MOD13Q1	250m_16_days_NDVI	0.2109	0.7031	0.5609	0.6149	-0.2	0.9207	1.1207	8093.85	0.0445	14429	14429	100
agr	A2004209	MOD13Q1	250m_16_days_NDVI	0.2119	0.6361	0.5715	0.6255	-0.1866	0.9196	1.1062	8246.27	0.0449	14429	14429	100
agr	A2004225	MOD13Q1	250m_16_days_NDVI	0.2061	0.651	0.5562	0.6022	-0.191	0.9135	1.1045	8010.34	0.0425	14429	14403	99.82
agr	A2004241	MOD13Q1	250m_16_days_NDVI	0.2046	0.6869	0.5382	0.5717	-0.1987	0.9132	1.1119	7765.73	0.0419	14429	14429	100
agr	A2004257	MOD13Q1	250m_16_days_NDVI	0.1968	0.5461	0.5106	0.5278	-0.1982	0.918	1.1162	7367.16	0.0387	14429	14429	100
agr	A2004273	MOD13Q1	250m_16_days_NDVI	0.1946	0.4698	0.4822	0.4809	-0.2	0.9264	1.1264	6939.05	0.0379	14429	14391	99.74
agr	A2004289	MOD13Q1	250m_16_days_NDVI	0.1823	0.2431	0.4423	0.4234	-0.1989	0.8851	1.084	6377.4	0.0332	14429	14420	99.94
agr	A2004305	MOD13Q1	250m_16_days_NDVI	0.1721	0.5337	0.5105	0.509	-0.1809	0.9282	1.1091	7366.01	0.0296	14429	14429	100
agr	A2004321	MOD13Q1	250m_16_days_NDVI	0.1561	0.6097	0.5538	0.5689	-0.1821	0.9119	1.094	7988.96	0.0244	14429	14426	99.98
agr	A2004337	MOD13Q1	250m_16_days_NDVI	0.1502	0.544	0.5046	0.5122	-0.191	0.8872	1.0782	7280.78	0.0226	14429	14429	100
agr	A2004353	MOD13Q1	250m_16_days_NDVI	0.1431	0.5065	0.523	0.5287	-0.1681	0.9013	1.0694	7545.13	0.0205	14429	14426	99.98
agr	A2005001	MOD13Q1	250m_16_days_NDVI	0.1791	0.6791	0.5273	0.5297	-0.1677	0.9922	1.1599	5926.29	0.0321	14429	11239	77.89
agr	A2005017	MOD13Q1	250m_16_days_NDVI	0.156	0.6683	0.5854	0.5934	-0.1765	0.921	1.0975	8442.21	0.0243	14429	14422	99.95
agr	A2005033	MOD13Q1	250m_16_days_NDVI	0.1693	0.6251	0.5739	0.5833	-0.1974	0.9186	1.116	8280.88	0.0287	14429	14429	100
agr	A2005049	MOD13Q1	250m_16_days_NDVI	0.1534	0.8181	0.6744	0.7152	-0.1245	0.9242	1.0487	9730.2	0.0235	14429	14428	99.99
agr	A2005065	MOD13Q1	250m_16_days_NDVI	0.1733	0.8312	0.6717	0.7202	-0.1857	0.9763	1.162	9692.06	0.03	14429	14429	100
agr	A2005081	MOD13Q1	250m_16_days_NDVI	0.1776	0.8612	0.6673	0.7171	-0.1916	0.9264	1.118	9628.07	0.0315	14429	14429	100
agr	A2005097	MOD13Q1	250m_16_days_NDVI	0.1597	0.7618	0.6381	0.668	-0.1337	0.9301	1.0638	9207.86	0.0255	14429	14429	100
agr	A2005113	MOD13Q1	250m_16_days_NDVI	0.1815	0.7668	0.5618	0.5846	-0.1751	0.9327	1.1078	8105.56	0.033	14429	14427	99.99
agr	A2005129	MOD13Q1	250m_16_days_NDVI	0.196	0.6998	0.5465	0.5607	-0.1265	0.9319	1.0584	7884.86	0.0384	14429	14427	99.99
agr	A2005145	MOD13Q1	250m_16_days_NDVI	0.1764	0.5464	0.5088	0.5081	-0.1508	0.9339	1.0847	7341.99	0.0311	14429	14429	100
agr	A2005161	MOD13Q1	250m_16_days_NDVI	0.1877	0.6512	0.524	0.5362	-0.1386	0.9154	1.054	7561.43	0.0352	14429	14429	100
agr	A2005177	MOD13Q1	250m_16_days_NDVI	0.1892	0.6789	0.5511	0.579	-0.1539	0.9269	1.0808	7951.23	0.0358	14429	14429	100
agr	A2005193	MOD13Q1	250m_16_days_NDVI	0.19	0.6373	0.5656	0.6051	-0.1322	0.9185	1.0507	8161.11	0.0361	14429	14429	100
agr	A2005209	MOD13Q1	250m_16_days_NDVI	0.1935	0.6855	0.5768	0.6266	-0.1802	0.9134	1.0936	8322.09	0.0374	14429	14429	100
agr	A2005225	MOD13Q1	250m_16_days_NDVI	0.1935	0.7681	0.5769	0.6245	-0.1902	0.9153	1.1055	8324.56	0.0374	14429	14429	100
agr	A2005241	MOD13Q1	250m_16_days_NDVI	0.1889	0.7402	0.5595	0.5993	-0.1567	0.9178	1.0745	8073.27	0.0357	14429	14429	100
agr	A2005257	MOD13Q1	250m_16_days_NDVI	0.1879	0.6532	0.542	0.5699	-0.1781	0.9159	1.094	7820.37	0.0353	14429	14429	100
agr	A2005273	MOD13Q1	250m_16_days_NDVI	0.185	0.6443	0.5029	0.5095	-0.1378	0.9115	1.0493	7256.59	0.0342	14429	14429	100
agr	A2005289	MOD13Q1	250m_16_days_NDVI	0.1725	0.3283	0.4608	0.4577	-0.1159	0.8898	1.0057	6644.96	0.0297	14429	14420	99.94
agr	A2005305	MOD13Q1	250m_16_days_NDVI	0.1753	0.2332	0.4214	0.3973	-0.1869	0.9104	1.0973	6048.27	0.0307	14429	14352	99.47
agr	A2005321	MOD13Q1	250m_16_days_NDVI	0.1691	0.2385	0.4108	0.3846	-0.173	0.895	1.068	5873.79	0.0286	14429	14298	99.09
agr	A2005337	MOD13Q1	250m_16_days_NDVI	0.1556	0.205	0.3774	0.3415	-0.1723	0.8904	1.0627	5437.82	0.0242	14429	14407	99.85
agr	A2005353	MOD13Q1	250m_16_days_NDVI	0.1277	0.37	0.3136	0.2941	-0.056	0.7729	0.8289	1271.86	0.0163	14429	4056	28.11
agr	A2006001	MOD13Q1	250m_16_days_NDVI	0.1501	0.4727	0.4521	0.4511	-0.1997	0.9156	1.1153	6523.5	0.0225	14429	14429	100
agr	A2006017	MOD13Q1	250m_16_days_NDVI	0.1465	0.4677	0.4805	0.4804	-0.186	0.8947	1.0807	6932.82	0.0215	14429	14429	100
agr	A2006033	MOD13Q1	250m_16_days_NDVI	0.165	0.6076	0.6067	0.624	-0.1722	0.9251	1.0973	8754.51	0.0272	14429	14429	100
agr	A2006049	MOD13Q1	250m_16_days_NDVI	0.1645	0.6	0.6095	0.6295	-0.1845	0.9242	1.1087	8793.88	0.027	14429	14429	100
agr	A2006065	MOD13Q1	250m_16_days_NDVI	0.1761	0.6657	0.6418	0.6724	-0.182	0.965	1.147	9259.31	0.031	14429	14428	99.99
agr	A2006081	MOD13Q1	250m_16_days_NDVI	0.1772	0.7991	0.6573	0.6839	-0.1636	0.997	1.1606	8767.32	0.0314	14429	13338	92.44
agr	A2006097	MOD13Q1	250m_16_days_NDVI	0.1748	0.8292	0.6802	0.7283	-0.1937	0.9758	1.1695	9815.06	0.0306	14429	14429	100
agr	A2006113	MOD13Q1	250m_16_days_NDVI	0.1662	0.7844	0.6475	0.6861	-0.1866	0.9418	1.1284	9342.99	0.0276	14429	14429	100
agr	A2006129	MOD13Q1	250m_16_days_NDVI	0.1694	0.3655	0.5462	0.5657	-0.1729	0.9198	1.0927	7880.76	0.0287	14429	14429	100
agr	A2006145	MOD13Q1	250m_16_days_NDVI	0.1763	0.4843	0.5275	0.539	-0.124	0.9236	1.0476	7610.83	0.0311	14429	14429	100
agr	A2006161	MOD13Q1	250m_16_days_NDVI	0.1862	0.5673	0.5059	0.5115	-0.1769	0.9149	1.0918	7299.49	0.0347	14429	14429	100
agr	A2006177	MOD13Q1	250m_16_days_NDVI	0.1876	0.6433	0.5463	0.5688	-0.1686	0.9197	1.0883	7882.24	0.0352	14429	14429	100
agr	A2006193	MOD13Q1	250m_16_days_NDVI	0.1929	0.7219	0.5729	0.6118	-0.1437	0.9104	1.0541	8267.01	0.0372	14429	14429	100
agr	A2006209	MOD13Q1	250m_16_days_NDVI	0.1907	0.6589	0.5697	0.6131	-0.1672	0.9044	1.0716	8219.65	0.0363	14429	14429	100
agr	A2006225	MOD13Q1	250m_16_days_NDVI	0.1956	0.7439	0.5726	0.6181	-0.1707	0.9209	1.0916	8261.1	0.0383	14429	14428	99.99
agr	A2006241	MOD13Q1	250m_16_days_NDVI	0.1896	0.6553	0.5586	0.599	-0.1784	0.9052	1.0836	8059.38	0.036	14429	14429	100
agr	A2006257	MOD13Q1	250m_16_days_NDVI	0.1864	0.5999	0.53	0.554	-0.1901	0.8924	1.0825	7646.66	0.0347	14429	14429	100
agr	A2006273	MOD13Q1	250m_16_days_NDVI	0.181	0.2431	0.487	0.4915	-0.1968	0.8941	1.0909	7025.94	0.0328	14429	14427	99.99
agr	A2006289	MOD13Q1	250m_16_days_NDVI	0.1668	0.3614	0.4489	0.4484	-0.2	0.8955	1.0955	6476.6	0.0278	14429	14429	100
agr	A2006305	MOD13Q1	250m_16_days_NDVI	0.1708	0.2386	0.4058	0.3732	-0.1707	0.8995	1.0702	5854.36	0.0292	14429	14427	99.99
agr	A2006321	MOD13Q1	250m_16_days_NDVI	0.17	0.2631	0.4299	0.4065	-0.1912	0.8909	1.0821	6203.06	0.0289	14429	14429	100
agr	A2006337	MOD13Q1	250m_16_days_NDVI	0.1521	0.3333	0.3981	0.3812	-0.1891	0.8855	1.0746	5743.59	0.0231	14429	14429	100
agr	A2006353	MOD13Q1	250m_16_days_NDVI	0.1435	0.4232	0.4232	0.416	-0.19	0.8568	1.0468	6105.7	0.0206	14429	14429	100
agr	A2007001	MOD13Q1	250m_16_days_NDVI	0.1347	0.3786	0.3965	0.3886	-0.184	0.8548	1.0388	5720.42	0.0181	14429	14429	100
agr	A2007017	MOD13Q1	250m_16_days_NDVI	0.1262	0.3333	0.38	0.3691	-0.1796	0.8639	1.0435	5482.9	0.0159	14429	14429	100
agr	A2007033	MOD13Q1	250m_16_days_NDVI	0.1525	0.5119	0.4984	0.5006	-0.1943	0.9205	1.1148	7190.83	0.0233	14429	14428	99.99
agr	A2007049	MOD13Q1	250m_16_days_NDVI	0.1677	0.5656	0.5783	0.5927	-0.1792	0.9368	1.116	8343.11	0.0281	14429	14427	99.99
agr	A2007065	MOD13Q1	250m_16_days_NDVI	0.1866	0.6003	0.6169	0.64	-0.167	0.9329	1.0999	8901.05	0.0348	14429	14429	100
agr	A2007081	MOD13Q1	250m_16_days_NDVI	0.1936	0.7278	0.6033	0.6314	-0.1954	0.939	1.1344	8705.07	0.0375	14429	14429	100
agr	A2007097	MOD13Q1	250m_16_days_NDVI	0.1813	0.5865	0.5311	0.5403	-0.1844	0.926	1.1104	7662.81	0.0329	14429	14429	100
agr	A2007113	MOD13Q1	250m_16_days_NDVI	0.195	0.7285	0.5432	0.5544	-0.1734	0.9273	1.1007	7837.14	0.038	14429	14429	100
agr	A2007129	MOD13Q1	250m_16_days_NDVI	0.1881	0.6901	0.5024	0.4988	-0.1757	0.9239	1.0996	7249.71	0.0354	14429	14429	100
agr	A2007145	MOD13Q1	250m_16_days_NDVI	0.1955	0.5819	0.5177	0.5288	-0.1402	0.9219	1.0621	7470.39	0.0382	14429	14429	100
agr	A2007161	MOD13Q1	250m_16_days_NDVI	0.1985	0.6213	0.5432	0.5649	-0.1116	0.9205	1.0321	7838.25	0.0394	14429	14429	100
agr	A2007177	MOD13Q1	250m_16_days_NDVI	0.1977	0.6676	0.5521	0.5825	-0.1862	0.9219	1.1081	7962.31	0.0391	14429	14423	99.96
agr	A2007193	MOD13Q1	250m_16_days_NDVI	0.1989	0.7142	0.5856	0.6329	-0.1998	0.9278	1.1276	8448	0.0395	14429	14426	99.98
agr	A2007209	MOD13Q1	250m_16_days_NDVI	0.1965	0.6988	0.5841	0.635	-0.1995	0.9161	1.1156	8428.59	0.0386	14429	14429	100
agr	A2007225	MOD13Q1	250m_16_days_NDVI	0.192	0.6717	0.5701	0.6158	-0.1929	0.9056	1.0985	8225.78	0.0369	14429	14429	100
agr	A2007241	MOD13Q1	250m_16_days_NDVI	0.1882	0.6407	0.5372	0.5646	-0.1897	0.898	1.0877	7750.88	0.0354	14429	14429	100
agr	A2007257	MOD13Q1	250m_16_days_NDVI	0.1916	0.5729	0.509	0.5156	-0.1976	0.9146	1.1122	7344.63	0.0367	14429	14429	100
agr	A2007273	MOD13Q1	250m_16_days_NDVI	0.1887	0.5623	0.5148	0.5193	-0.1879	0.9131	1.101	7427.81	0.0356	14429	14429	100
agr	A2007289	MOD13Q1	250m_16_days_NDVI	0.1912	0.5551	0.4749	0.4605	-0.1888	0.9307	1.1195	6852.99	0.0366	14429	14429	100
agr	A2007305	MOD13Q1	250m_16_days_NDVI	0.1757	0.3333	0.4592	0.4449	-0.1876	0.9026	1.0902	6626.19	0.0309	14429	14429	100
agr	A2007321	MOD13Q1	250m_16_days_NDVI	0.171	0.6094	0.458	0.4464	-0.1973	0.9034	1.1007	6607.8	0.0292	14429	14429	100
agr	A2007337	MOD13Q1	250m_16_days_NDVI	0.1591	0.2852	0.4256	0.4088	-0.1765	0.8983	1.0748	6140.86	0.0253	14429	14429	100
agr	A2007353	MOD13Q1	250m_16_days_NDVI	0.1532	0.3333	0.4253	0.4127	-0.1386	0.9007	1.0393	6135.81	0.0235	14429	14426	99.98
agr	A2008001	MOD13Q1	250m_16_days_NDVI	0.1444	0.3186	0.3908	0.3819	-0.189	0.8771	1.0661	5638.85	0.0209	14429	14428	99.99
agr	A2008017	MOD13Q1	250m_16_days_NDVI	0.1532	0.3333	0.44	0.4361	-0.1968	0.9303	1.1271	6344.31	0.0235	14429	14418	99.92
agr	A2008033	MOD13Q1	250m_16_days_NDVI	0.1615	0.5057	0.4799	0.4824	-0.1935	0.9316	1.1251	6925.05	0.0261	14429	14429	100
agr	A2008049	MOD13Q1	250m_16_days_NDVI	0.1746	0.7882	0.6005	0.626	-0.1919	0.9379	1.1298	8664.7	0.0305	14429	14428	99.99
agr	A2008065	MOD13Q1	250m_16_days_NDVI	0.1752	0.7683	0.6402	0.6761	-0.1955	0.9487	1.1442	9237.79	0.0307	14429	14429	100
agr	A2008081	MOD13Q1	250m_16_days_NDVI	0.1795	0.7594	0.6415	0.6843	-0.185	0.9323	1.1173	9255.24	0.0322	14429	14428	99.99
agr	A2008097	MOD13Q1	250m_16_days_NDVI	0.1789	0.7461	0.5776	0.6027	-0.1876	0.928	1.1156	8334.39	0.032	14429	14429	100
agr	A2008113	MOD13Q1	250m_16_days_NDVI	0.1785	0.6046	0.5458	0.5642	-0.14	0.918	1.058	7875.21	0.0319	14429	14429	100
agr	A2008129	MOD13Q1	250m_16_days_NDVI	0.1748	0.3233	0.4943	0.4847	-0.0575	0.9046	0.9621	7131.69	0.0305	14429	14429	100
agr	A2008145	MOD13Q1	250m_16_days_NDVI	0.1801	0.4139	0.4936	0.4893	-0.1804	0.9006	1.081	7121.14	0.0324	14429	14426	99.98
agr	A2008161	MOD13Q1	250m_16_days_NDVI	0.1861	0.6598	0.5303	0.5418	-0.1862	0.924	1.1102	7649.61	0.0346	14429	14426	99.98
agr	A2008177	MOD13Q1	250m_16_days_NDVI	0.1822	0.6167	0.5346	0.5514	-0.1913	0.9187	1.11	7713.37	0.0332	14429	14429	100
agr	A2008193	MOD13Q1	250m_16_days_NDVI	0.1881	0.727	0.5598	0.5925	-0.1277	0.8962	1.0239	8077.36	0.0354	14429	14429	100
agr	A2008209	MOD13Q1	250m_16_days_NDVI	0.1949	0.7039	0.5893	0.639	-0.193	0.9177	1.1107	8502.31	0.038	14429	14429	100
agr	A2008225	MOD13Q1	250m_16_days_NDVI	0.1909	0.743	0.5762	0.6202	-0.1914	0.9072	1.0986	8313.84	0.0364	14429	14429	100
agr	A2008241	MOD13Q1	250m_16_days_NDVI	0.1838	0.6772	0.5508	0.5863	-0.1944	0.8954	1.0898	7948.03	0.0338	14429	14429	100
agr	A2008257	MOD13Q1	250m_16_days_NDVI	0.1834	0.7304	0.5153	0.5213	-0.1472	0.9047	1.0519	7435.77	0.0336	14429	14429	100
agr	A2008273	MOD13Q1	250m_16_days_NDVI	0.1821	0.251	0.4969	0.4952	-0.1966	0.9092	1.1058	7170.01	0.0332	14429	14429	100
agr	A2008289	MOD13Q1	250m_16_days_NDVI	0.1717	0.5407	0.4628	0.459	-0.1914	0.9005	1.0919	6677.19	0.0295	14429	14429	100
agr	A2008305	MOD13Q1	250m_16_days_NDVI	0.1873	0.2548	0.4708	0.454	-0.1983	0.917	1.1153	6782.61	0.0351	14429	14406	99.84
agr	A2008321	MOD13Q1	250m_16_days_NDVI	0.1782	0.2547	0.4427	0.4204	-0.1952	0.9036	1.0988	6388.11	0.0317	14429	14429	100
agr	A2008337	MOD13Q1	250m_16_days_NDVI	0.1634	0.3333	0.4479	0.4384	-0.1745	0.9132	1.0877	6460.48	0.0267	14429	14423	99.96
agr	A2008353	MOD13Q1	250m_16_days_NDVI	0.1417	0.3291	0.405	0.3953	-0.1438	0.864	1.0078	5843.89	0.0201	14429	14429	100
agr	A2009001	MOD13Q1	250m_16_days_NDVI	0.1392	0.2432	0.3992	0.391	-0.1828	0.8917	1.0745	5760.68	0.0194	14429	14429	100
agr	A2009017	MOD13Q1	250m_16_days_NDVI	0.1426	0.4367	0.4603	0.458	-0.1711	0.8889	1.06	6642.05	0.0203	14429	14429	100
agr	A2009033	MOD13Q1	250m_16_days_NDVI	0.1628	0.5684	0.4855	0.4875	-0.1991	0.9176	1.1167	7004.95	0.0265	14429	14429	100
agr	A2009049	MOD13Q1	250m_16_days_NDVI	0.1847	0.6978	0.5923	0.6166	-0.1977	0.9392	1.1369	8541.49	0.0341	14429	14421	99.94
agr	A2009065	MOD13Q1	250m_16_days_NDVI	0.1686	0.8009	0.6444	0.6784	-0.1913	0.9317	1.123	9298.47	0.0284	14429	14429	100
agr	A2009081	MOD13Q1	250m_16_days_NDVI	0.1664	0.7144	0.6535	0.6861	-0.1868	0.9345	1.1213	9429.51	0.0277	14429	14429	100
agr	A2009097	MOD13Q1	250m_16_days_NDVI	0.1819	0.7639	0.5995	0.635	-0.1969	0.9232	1.1201	8650.43	0.0331	14429	14429	100
agr	A2009113	MOD13Q1	250m_16_days_NDVI	0.1788	0.6173	0.5481	0.568	-0.1121	0.9265	1.0386	7908.47	0.032	14429	14429	100
agr	A2009129	MOD13Q1	250m_16_days_NDVI	0.1788	0.2433	0.4971	0.4989	-0.1705	0.9124	1.0829	7172.56	0.032	14429	14429	100
agr	A2009145	MOD13Q1	250m_16_days_NDVI	0.1824	0.248	0.4913	0.4905	-0.1939	0.903	1.0969	7085.89	0.0333	14429	14422	99.95
agr	A2009161	MOD13Q1	250m_16_days_NDVI	0.1887	0.3345	0.5161	0.5352	-0.1895	0.9065	1.096	7446.91	0.0356	14429	14429	100
agr	A2009177	MOD13Q1	250m_16_days_NDVI	0.1907	0.6312	0.5504	0.5867	-0.1104	0.91	1.0204	7941.2	0.0364	14429	14429	100
agr	A2009193	MOD13Q1	250m_16_days_NDVI	0.1954	0.702	0.572	0.6176	-0.1516	0.9155	1.0671	8253.08	0.0382	14429	14429	100
agr	A2009209	MOD13Q1	250m_16_days_NDVI	0.1914	0.665	0.5717	0.6232	-0.1367	0.8964	1.0331	8249.77	0.0366	14429	14429	100
agr	A2009225	MOD13Q1	250m_16_days_NDVI	0.1878	0.7262	0.5617	0.6059	-0.1965	0.8947	1.0912	8105.18	0.0353	14429	14429	100
agr	A2009241	MOD13Q1	250m_16_days_NDVI	0.1803	0.6997	0.541	0.5758	-0.1838	0.8909	1.0747	7806.1	0.0325	14429	14429	100
agr	A2009257	MOD13Q1	250m_16_days_NDVI	0.1851	0.664	0.5358	0.5583	-0.0515	0.8991	0.9506	7730.51	0.0343	14429	14429	100
agr	A2009273	MOD13Q1	250m_16_days_NDVI	0.1801	0.1858	0.4573	0.4522	-0.1892	0.9006	1.0898	6598.82	0.0324	14429	14429	100
agr	A2009289	MOD13Q1	250m_16_days_NDVI	0.1783	0.5383	0.5083	0.5048	-0.1881	0.9114	1.0995	7333.92	0.0318	14429	14429	100
agr	A2009305	MOD13Q1	250m_16_days_NDVI	0.1728	0.5603	0.4888	0.4839	-0.1472	0.9103	1.0575	7052.69	0.0299	14429	14429	100
agr	A2009321	MOD13Q1	250m_16_days_NDVI	0.1534	0.5	0.4581	0.4562	-0.1743	0.8914	1.0657	6609.66	0.0235	14429	14429	100
agr	A2009337	MOD13Q1	250m_16_days_NDVI	0.1395	0.3237	0.3899	0.3818	-0.1973	0.8686	1.0659	5623.21	0.0195	14429	14424	99.97
agr	A2009353	MOD13Q1	250m_16_days_NDVI	0.1452	0.4997	0.4277	0.423	-0.1687	0.9069	1.0756	6170.15	0.0211	14429	14425	99.97
agr	A2010001	MOD13Q1	250m_16_days_NDVI	0.1433	0.5651	0.4755	0.465	-0.2	0.9077	1.1077	6845.85	0.0205	14429	14396	99.77
agr	A2010017	MOD13Q1	250m_16_days_NDVI	0.1545	0.5122	0.5201	0.5207	-0.1968	0.9392	1.136	7495.52	0.0239	14429	14411	99.88
agr	A2010033	MOD13Q1	250m_16_days_NDVI	0.1596	0.7827	0.5822	0.5954	-0.1942	0.9018	1.096	8401.09	0.0255	14429	14429	100
agr	A2010049	MOD13Q1	250m_16_days_NDVI	0.1818	0.4272	0.6037	0.6324	-0.1928	0.9944	1.1872	7583.13	0.033	14429	12562	87.06
agr	A2010065	MOD13Q1	250m_16_days_NDVI	0.1634	0.8057	0.671	0.7084	-0.1942	0.9361	1.1303	9680.78	0.0267	14429	14428	99.99
agr	A2010081	MOD13Q1	250m_16_days_NDVI	0.1734	0.7844	0.6383	0.6791	-0.0536	0.9225	0.9761	9210.28	0.0301	14429	14429	100
agr	A2010097	MOD13Q1	250m_16_days_NDVI	0.1823	0.7097	0.6337	0.6884	-0.1133	0.9265	1.0398	9142.39	0.0332	14429	14427	99.99
agr	A2010113	MOD13Q1	250m_16_days_NDVI	0.1819	0.7644	0.6008	0.6382	-0.1987	0.9209	1.1196	8668.47	0.0331	14429	14429	100
agr	A2010129	MOD13Q1	250m_16_days_NDVI	0.1739	0.6697	0.5233	0.5347	-0.1954	0.9094	1.1048	7550.24	0.0302	14429	14429	100
agr	A2010145	MOD13Q1	250m_16_days_NDVI	0.1776	0.3029	0.5092	0.5081	-0.1443	0.9148	1.0591	7347.63	0.0315	14429	14429	100
agr	A2010161	MOD13Q1	250m_16_days_NDVI	0.1717	0.5159	0.5035	0.5115	-0.1554	0.9028	1.0582	7264.96	0.0295	14429	14429	100
agr	A2010177	MOD13Q1	250m_16_days_NDVI	0.1583	0.7053	0.6067	0.6334	0.1445	0.8972	0.7527	8754.41	0.0251	14429	14429	100
agr	A2010193	MOD13Q1	250m_16_days_NDVI	0.1933	0.7191	0.565	0.6081	-0.1798	0.902	1.0818	8151.77	0.0374	14429	14429	100
agr	A2010209	MOD13Q1	250m_16_days_NDVI	0.1958	0.778	0.5762	0.6291	-0.1787	0.8976	1.0763	8314.63	0.0384	14429	14429	100
agr	A2010225	MOD13Q1	250m_16_days_NDVI	0.1962	0.7732	0.5782	0.6331	-0.1846	0.9075	1.0921	8343.46	0.0385	14429	14429	100
agr	A2010241	MOD13Q1	250m_16_days_NDVI	0.1917	0.6789	0.5615	0.6084	-0.1663	0.8959	1.0622	8102.07	0.0367	14429	14429	100
agr	A2010257	MOD13Q1	250m_16_days_NDVI	0.185	0.662	0.5297	0.5578	-0.1651	0.9012	1.0663	7643.46	0.0342	14429	14429	100
agr	A2010273	MOD13Q1	250m_16_days_NDVI	0.1837	0.4948	0.4858	0.4857	-0.155	0.8986	1.0536	7009.24	0.0338	14429	14429	100
agr	A2010289	MOD13Q1	250m_16_days_NDVI	0.1794	0.2353	0.4372	0.4199	-0.1823	0.9014	1.0837	6304.67	0.0322	14429	14421	99.94
agr	A2010305	MOD13Q1	250m_16_days_NDVI	0.1857	0.2491	0.4756	0.4572	-0.175	0.9111	1.0861	6862.16	0.0345	14429	14429	100
agr	A2010321	MOD13Q1	250m_16_days_NDVI	0.1718	0.2392	0.4471	0.429	-0.1921	0.9022	1.0943	6450.61	0.0295	14429	14429	100
agr	A2010337	MOD13Q1	250m_16_days_NDVI	0.1643	0.3051	0.4615	0.4539	-0.1951	0.9898	1.1849	6605.21	0.027	14429	14311	99.18
agr	A2010353	MOD13Q1	250m_16_days_NDVI	0.1534	0.4158	0.4645	0.4588	-0.197	0.9039	1.1009	6699.85	0.0235	14429	14425	99.97
agr	A2011001	MOD13Q1	250m_16_days_NDVI	0.1326	0.5318	0.4901	0.488	-0.2	0.9078	1.1078	6291.7	0.0176	14429	12837	88.97
agr	A2011017	MOD13Q1	250m_16_days_NDVI	0.1549	0.5207	0.5379	0.5405	-0.1573	0.9075	1.0648	7760.95	0.024	14429	14429	100
agr	A2011033	MOD13Q1	250m_16_days_NDVI	0.1534	0.6671	0.5762	0.5834	-0.1563	0.9063	1.0626	8313.68	0.0235	14429	14429	100
agr	A2011049	MOD13Q1	250m_16_days_NDVI	0.1696	0.5674	0.574	0.5945	-0.1972	0.9195	1.1167	8282.79	0.0288	14429	14429	100
agr	A2011065	MOD13Q1	250m_16_days_NDVI	0.1908	0.7289	0.5772	0.6038	-0.1879	0.9324	1.1203	8327.82	0.0364	14429	14429	100
agr	A2011081	MOD13Q1	250m_16_days_NDVI	0.1617	0.7687	0.6685	0.7071	-0.1931	0.9318	1.1249	9645.35	0.0261	14429	14429	100
agr	A2011097	MOD13Q1	250m_16_days_NDVI	0.1689	0.7834	0.635	0.6772	-0.1939	0.9241	1.118	9158.74	0.0285	14429	14423	99.96
agr	A2011113	MOD13Q1	250m_16_days_NDVI	0.1645	0.6537	0.5833	0.6122	-0.0257	0.9199	0.9456	8416.56	0.0271	14429	14429	100
agr	A2011129	MOD13Q1	250m_16_days_NDVI	0.1714	0.681	0.5312	0.5443	-0.071	0.9061	0.9771	7664.81	0.0294	14429	14429	100
agr	A2011145	MOD13Q1	250m_16_days_NDVI	0.1738	0.4547	0.4807	0.476	-0.1265	0.916	1.0425	6935.41	0.0302	14429	14429	100
agr	A2011161	MOD13Q1	250m_16_days_NDVI	0.1868	0.6923	0.5099	0.5154	-0.1073	0.9128	1.0201	7357.28	0.0349	14429	14429	100
agr	A2011177	MOD13Q1	250m_16_days_NDVI	0.1889	0.6626	0.5476	0.5762	-0.1358	0.9209	1.0567	7900.84	0.0357	14429	14429	100
agr	A2011193	MOD13Q1	250m_16_days_NDVI	0.1915	0.6146	0.5672	0.6115	-0.1621	0.9098	1.0719	8184.78	0.0367	14429	14429	100
agr	A2011209	MOD13Q1	250m_16_days_NDVI	0.1953	0.7644	0.5853	0.6387	-0.1827	0.9085	1.0912	8445.96	0.0381	14429	14429	100
agr	A2011225	MOD13Q1	250m_16_days_NDVI	0.1943	0.6739	0.5822	0.6369	-0.1908	0.9094	1.1002	8400.12	0.0377	14429	14429	100
agr	A2011241	MOD13Q1	250m_16_days_NDVI	0.1875	0.7031	0.5701	0.62	-0.1473	0.9009	1.0482	8225.73	0.0352	14429	14429	100
agr	A2011257	MOD13Q1	250m_16_days_NDVI	0.1809	0.6369	0.5361	0.5661	-0.1864	0.8931	1.0795	7735.84	0.0327	14429	14429	100
agr	A2011273	MOD13Q1	250m_16_days_NDVI	0.1834	0.5949	0.5213	0.5304	-0.1712	0.9008	1.072	7522.39	0.0336	14429	14429	100
agr	A2011289	MOD13Q1	250m_16_days_NDVI	0.1783	0.5147	0.491	0.4838	-0.1632	0.904	1.0672	7084.36	0.0318	14429	14429	100
agr	A2011305	MOD13Q1	250m_16_days_NDVI	0.165	0.2271	0.4254	0.4069	-0.1929	0.8975	1.0904	6137.82	0.0272	14429	14427	99.99
agr	A2011321	MOD13Q1	250m_16_days_NDVI	0.148	0.2145	0.3865	0.3666	-0.1647	0.8566	1.0213	5576.09	0.0219	14429	14429	100
agr	A2011337	MOD13Q1	250m_16_days_NDVI	0.1337	0.235	0.3581	0.3365	-0.1888	0.8457	1.0345	5167.6	0.0179	14429	14429	100
agr	A2011353	MOD13Q1	250m_16_days_NDVI	0.1235	0.3333	0.3399	0.3213	-0.1495	0.843	0.9925	4905.13	0.0153	14429	14429	100
agr	A2012001	MOD13Q1	250m_16_days_NDVI	0.1132	0.3333	0.3344	0.3195	-0.1922	0.8524	1.0446	4823.56	0.0128	14429	14426	99.98
agr	A2012017	MOD13Q1	250m_16_days_NDVI	0.1201	0.2718	0.3295	0.3091	-0.1978	0.8892	1.087	4754.66	0.0144	14429	14429	100
agr	A2012033	MOD13Q1	250m_16_days_NDVI	0.1614	0.374	0.4393	0.4249	-0.1768	0.9087	1.0855	6338.72	0.026	14429	14429	100
agr	A2012049	MOD13Q1	250m_16_days_NDVI	0.1826	0.3271	0.4884	0.4721	-0.1878	0.917	1.1048	7047.4	0.0334	14429	14429	100
agr	A2012065	MOD13Q1	250m_16_days_NDVI	0.1859	0.4621	0.5196	0.5171	-0.0836	0.9254	1.009	7492.98	0.0346	14429	14420	99.94
agr	A2012081	MOD13Q1	250m_16_days_NDVI	0.1865	0.6737	0.6127	0.643	-0.1566	0.9381	1.0947	8840.79	0.0348	14429	14429	100
agr	A2012097	MOD13Q1	250m_16_days_NDVI	0.1902	0.7976	0.6174	0.6598	-0.1991	0.9352	1.1343	8903.33	0.0362	14429	14420	99.94
agr	A2012113	MOD13Q1	250m_16_days_NDVI	0.177	0.6944	0.5801	0.6199	-0.0937	0.9058	0.9995	8370.29	0.0313	14429	14429	100
agr	A2012129	MOD13Q1	250m_16_days_NDVI	0.1748	0.3333	0.5381	0.5513	-0.1544	0.9067	1.0611	7764.61	0.0306	14429	14429	100
agr	A2012145	MOD13Q1	250m_16_days_NDVI	0.1793	0.3442	0.4951	0.4958	-0.149	0.901	1.05	7143.27	0.0321	14429	14427	99.99
agr	A2012161	MOD13Q1	250m_16_days_NDVI	0.1888	0.5897	0.5095	0.5198	-0.136	0.895	1.031	7351.89	0.0356	14429	14429	100
agr	A2012177	MOD13Q1	250m_16_days_NDVI	0.1864	0.6168	0.5448	0.5707	-0.165	0.9031	1.0681	7861.11	0.0348	14429	14429	100
agr	A2012193	MOD13Q1	250m_16_days_NDVI	0.1914	0.708	0.5747	0.6175	-0.1562	0.9052	1.0614	8292.31	0.0366	14429	14429	100
agr	A2012209	MOD13Q1	250m_16_days_NDVI	0.192	0.6626	0.5847	0.6338	-0.1692	0.9131	1.0823	8436.03	0.0369	14429	14429	100
agr	A2012225	MOD13Q1	250m_16_days_NDVI	0.1895	0.729	0.5787	0.6297	-0.1969	0.9107	1.1076	8350.3	0.0359	14429	14429	100
agr	A2012241	MOD13Q1	250m_16_days_NDVI	0.1847	0.747	0.5575	0.5946	-0.1904	0.8945	1.0849	8044.31	0.0341	14429	14429	100
agr	A2012257	MOD13Q1	250m_16_days_NDVI	0.1831	0.7077	0.5328	0.5505	-0.1432	0.9073	1.0505	7687.42	0.0335	14429	14429	100
agr	A2012273	MOD13Q1	250m_16_days_NDVI	0.1814	0.4946	0.4949	0.4889	-0.2	0.9136	1.1136	7141.17	0.0329	14429	14429	100
agr	A2012289	MOD13Q1	250m_16_days_NDVI	0.1837	0.3805	0.4858	0.4767	-0.1449	0.9095	1.0544	7009.69	0.0337	14429	14429	100
agr	A2012305	MOD13Q1	250m_16_days_NDVI	0.1855	0.347	0.4693	0.45	-0.2	0.9341	1.1341	6771.38	0.0344	14429	14429	100
agr	A2012321	MOD13Q1	250m_16_days_NDVI	0.1677	0.4842	0.4461	0.4324	-0.1759	0.8955	1.0714	6436.26	0.0281	14429	14429	100
agr	A2012337	MOD13Q1	250m_16_days_NDVI	0.1686	0.5083	0.4674	0.464	-0.1873	0.8837	1.071	6739.04	0.0284	14429	14419	99.93
agr	A2012353	MOD13Q1	250m_16_days_NDVI	0.1608	0.4763	0.4671	0.475	-0.1842	0.8872	1.0714	6738.88	0.0258	14429	14428	99.99
agr	A2013001	MOD13Q1	250m_16_days_NDVI	0.1572	0.491	0.4905	0.4976	-0.1624	0.9064	1.0688	7077.32	0.0247	14429	14429	100
agr	A2013017	MOD13Q1	250m_16_days_NDVI	0.1562	0.6435	0.5193	0.5246	-0.1824	0.9305	1.1129	7492.4	0.0244	14429	14429	100
agr	A2013033	MOD13Q1	250m_16_days_NDVI	0.162	0.5945	0.5552	0.5707	-0.1659	0.9038	1.0697	8008.12	0.0263	14429	14425	99.97
agr	A2013049	MOD13Q1	250m_16_days_NDVI	0.1677	0.7396	0.5911	0.6162	-0.173	0.9506	1.1236	8528.83	0.0281	14429	14429	100
agr	A2013065	MOD13Q1	250m_16_days_NDVI	0.175	0.7861	0.6313	0.6724	-0.1879	0.9347	1.1226	9109.24	0.0306	14429	14429	100
agr	A2013081	MOD13Q1	250m_16_days_NDVI	0.1808	0.7679	0.6157	0.6538	-0.1757	0.9341	1.1098	8884.28	0.0327	14429	14429	100
agr	A2013097	MOD13Q1	250m_16_days_NDVI	0.1739	0.7643	0.6262	0.661	-0.1859	0.9249	1.1108	9035.57	0.0302	14429	14429	100
agr	A2013113	MOD13Q1	250m_16_days_NDVI	0.1663	0.6301	0.524	0.5343	-0.1836	0.895	1.0786	7561.12	0.0276	14429	14429	100
agr	A2013129	MOD13Q1	250m_16_days_NDVI	0.1754	0.7654	0.511	0.5191	-0.1335	0.9097	1.0432	7373.65	0.0308	14429	14429	100
agr	A2013145	MOD13Q1	250m_16_days_NDVI	0.1751	0.3998	0.4953	0.5038	-0.1399	0.8834	1.0233	7146.35	0.0307	14429	14429	100
agr	A2013161	MOD13Q1	250m_16_days_NDVI	0.1868	0.4396	0.5036	0.5122	-0.1909	0.8915	1.0824	7266.37	0.0349	14429	14429	100
agr	A2013177	MOD13Q1	250m_16_days_NDVI	0.1936	0.4975	0.56	0.5966	-0.1859	0.9158	1.1017	8079.55	0.0375	14429	14429	100
agr	A2013193	MOD13Q1	250m_16_days_NDVI	0.1937	0.6853	0.5742	0.6229	-0.1804	0.9042	1.0846	8284.42	0.0375	14429	14429	100
agr	A2013241	MOD13Q1	250m_16_days_NDVI	0.1897	0.5618	0.5478	0.5813	-0.1864	0.8953	1.0817	7903.56	0.036	14429	14429	100
agr	A2013257	MOD13Q1	250m_16_days_NDVI	0.1839	0.6545	0.5214	0.5401	-0.1919	0.9102	1.1021	7523.24	0.0338	14429	14429	100
agr	A2013273	MOD13Q1	250m_16_days_NDVI	0.1787	0.5023	0.4729	0.4712	-0.1868	0.893	1.0798	6823.45	0.0319	14429	14429	100
agr	A2013289	MOD13Q1	250m_16_days_NDVI	0.177	0.2942	0.4357	0.4231	-0.161	0.8887	1.0497	6287	0.0313	14429	14429	100
agr	A2013305	MOD13Q1	250m_16_days_NDVI	0.1695	0.2286	0.3963	0.3652	-0.1529	0.8747	1.0276	5711.53	0.0287	14429	14412	99.88
agr	A2013321	MOD13Q1	250m_16_days_NDVI	0.1598	0.2366	0.3798	0.3434	-0.1971	0.8873	1.0844	5462.5	0.0255	14429	14382	99.67
agr	A2013337	MOD13Q1	250m_16_days_NDVI	0.1456	0.2819	0.3928	0.3616	-0.2	0.8774	1.0774	5662.62	0.0212	14429	14416	99.91
agr	A2013353	MOD13Q1	250m_16_days_NDVI	0.1059	0.3071	0.3321	0.3182	-0.1876	0.8333	1.0209	4792.53	0.0112	14429	14429	100
agr	A2014001	MOD13Q1	250m_16_days_NDVI	0.1041	0.2173	0.332	0.3183	-0.1712	0.841	1.0122	4789.92	0.0108	14429	14429	100
agr	A2014017	MOD13Q1	250m_16_days_NDVI	0.1294	0.3311	0.3523	0.3248	-0.1908	0.9266	1.1174	5082.83	0.0167	14429	14426	99.98
agr	A2014033	MOD13Q1	250m_16_days_NDVI	0.159	0.3333	0.399	0.3654	-0.1604	0.9364	1.0968	5757.52	0.0253	14429	14429	100
	date[YYYYDDD]	product	band	stddev	mode	mean	median	min	max	range	sum	variance	tot_pixels	pixels_pass_qa	per_cent_pixels_pass_qa
nat	A2000049	MOD13Q1	250m_16_days_NDVI	0.11	0.5645	0.5613	0.5655	-0.1814	0.9154	1.0968	5711.82	0.0121	10176	10176	100
nat	A2000065	MOD13Q1	250m_16_days_NDVI	0.0949	0.625	0.6207	0.6239	-0.1908	0.9151	1.1059	6315.81	0.009	10176	10176	100
nat	A2000081	MOD13Q1	250m_16_days_NDVI	0.0881	0.6883	0.665	0.6718	-0.1026	0.9281	1.0307	6767.33	0.0078	10176	10176	100
nat	A2000097	MOD13Q1	250m_16_days_NDVI	0.0909	0.6739	0.6466	0.6601	0.0656	0.9103	0.8447	6578.13	0.0083	10176	10174	99.98
nat	A2000113	MOD13Q1	250m_16_days_NDVI	0.1004	0.6323	0.6028	0.6263	0.0762	0.9063	0.8301	6133.75	0.0101	10176	10176	100
nat	A2000129	MOD13Q1	250m_16_days_NDVI	0.1253	0.5762	0.5123	0.5281	-0.1722	0.9111	1.0833	5213.16	0.0157	10176	10176	100
nat	A2000145	MOD13Q1	250m_16_days_NDVI	0.1083	0.3981	0.3732	0.367	-0.0248	0.8544	0.8792	3797.64	0.0117	10176	10175	99.99
nat	A2000161	MOD13Q1	250m_16_days_NDVI	0.0996	0.2762	0.3033	0.2828	-0.1307	0.8638	0.9945	3086.22	0.0099	10176	10176	100
nat	A2000177	MOD13Q1	250m_16_days_NDVI	0.1006	0.2287	0.2718	0.2433	0.0443	0.8683	0.824	2765.34	0.0101	10176	10176	100
nat	A2000193	MOD13Q1	250m_16_days_NDVI	0.1012	0.2308	0.2643	0.2358	-0.1895	0.9186	1.1081	2689.24	0.0102	10176	10176	100
nat	A2000209	MOD13Q1	250m_16_days_NDVI	0.0888	0.2047	0.2507	0.2253	0.0428	0.8618	0.819	2550.52	0.0079	10176	10173	99.97
nat	A2000225	MOD13Q1	250m_16_days_NDVI	0.0894	0.2176	0.2511	0.2275	0.0468	0.8786	0.8318	2555.67	0.008	10176	10176	100
nat	A2000241	MOD13Q1	250m_16_days_NDVI	0.0912	0.2177	0.2575	0.2297	-0.003	0.8749	0.8779	2620.26	0.0083	10176	10176	100
nat	A2000257	MOD13Q1	250m_16_days_NDVI	0.0911	0.2214	0.2565	0.2283	0.0543	0.8756	0.8213	2610.46	0.0083	10176	10176	100
nat	A2000273	MOD13Q1	250m_16_days_NDVI	0.0897	0.2136	0.2516	0.2244	-0.0168	0.8961	0.9129	2559.56	0.0081	10176	10174	99.98
nat	A2000289	MOD13Q1	250m_16_days_NDVI	0.0944	0.2058	0.2606	0.2283	-0.0231	0.8824	0.9055	2651.87	0.0089	10176	10176	100
nat	A2000305	MOD13Q1	250m_16_days_NDVI	0.0985	0.3768	0.4137	0.3975	0.0501	0.9189	0.8688	4209.59	0.0097	10176	10176	100
nat	A2000321	MOD13Q1	250m_16_days_NDVI	0.0936	0.4702	0.4385	0.4382	-0.071	0.8482	0.9192	4462.29	0.0088	10176	10176	100
nat	A2000337	MOD13Q1	250m_16_days_NDVI	0.0951	0.5088	0.5129	0.5165	-0.1339	0.8773	1.0112	5217.3	0.009	10176	10173	99.97
nat	A2000353	MOD13Q1	250m_16_days_NDVI	0.0848	0.5267	0.5174	0.5196	-0.1504	0.8712	1.0216	5264.38	0.0072	10176	10175	99.99
nat	A2001001	MOD13Q1	250m_16_days_NDVI	0.0869	0.5	0.5237	0.5288	-0.0992	0.8471	0.9463	5328.29	0.0076	10176	10175	99.99
nat	A2001017	MOD13Q1	250m_16_days_NDVI	0.0807	0.5473	0.545	0.5495	-0.0754	0.8564	0.9318	5545.43	0.0065	10176	10176	100
nat	A2001033	MOD13Q1	250m_16_days_NDVI	0.0801	0.5715	0.5573	0.5617	-0.005	0.8868	0.8918	5670.69	0.0064	10176	10176	100
nat	A2001049	MOD13Q1	250m_16_days_NDVI	0.0946	0.6567	0.616	0.6275	-0.1216	0.9261	1.0477	6266.2	0.0089	10176	10172	99.96
nat	A2001065	MOD13Q1	250m_16_days_NDVI	0.077	0.6935	0.682	0.6886	0.0878	0.9275	0.8397	6940.47	0.0059	10176	10176	100
nat	A2001081	MOD13Q1	250m_16_days_NDVI	0.0753	0.7106	0.681	0.6894	0.2287	0.9223	0.6936	6929.44	0.0057	10176	10176	100
nat	A2001097	MOD13Q1	250m_16_days_NDVI	0.1266	0.5953	0.5675	0.5992	-0.1745	0.8759	1.0504	5775.19	0.016	10176	10176	100
nat	A2001113	MOD13Q1	250m_16_days_NDVI	0.1211	0.5251	0.496	0.5136	-0.0179	0.8741	0.892	5047.23	0.0147	10176	10176	100
nat	A2001129	MOD13Q1	250m_16_days_NDVI	0.0891	0.3373	0.3474	0.3406	0.0614	0.8676	0.8062	3534.98	0.0079	10176	10176	100
nat	A2001145	MOD13Q1	250m_16_days_NDVI	0.0839	0.2337	0.2783	0.2606	0.059	0.8153	0.7563	2831.83	0.007	10176	10176	100
nat	A2001161	MOD13Q1	250m_16_days_NDVI	0.0772	0.2487	0.2584	0.2436	-0.1027	0.8676	0.9703	2629.24	0.006	10176	10176	100
nat	A2001177	MOD13Q1	250m_16_days_NDVI	0.0836	0.2292	0.2533	0.2303	-0.0713	0.8265	0.8978	2577.43	0.007	10176	10175	99.99
nat	A2001193	MOD13Q1	250m_16_days_NDVI	0.0925	0.2169	0.2562	0.2285	-0.148	0.8788	1.0268	2606.82	0.0086	10176	10175	99.99
nat	A2001209	MOD13Q1	250m_16_days_NDVI	0.0903	0.2188	0.2489	0.2226	0.0802	0.8439	0.7637	2532.38	0.0081	10176	10173	99.97
nat	A2001225	MOD13Q1	250m_16_days_NDVI	0.0901	0.2172	0.2468	0.2205	0.0009	0.8762	0.8753	2511.05	0.0081	10176	10176	100
nat	A2001241	MOD13Q1	250m_16_days_NDVI	0.0854	0.1926	0.2412	0.2173	-0.0457	0.844	0.8897	2454.47	0.0073	10176	10176	100
nat	A2001257	MOD13Q1	250m_16_days_NDVI	0.086	0.2069	0.2524	0.2253	0.0976	0.8591	0.7615	2568.17	0.0074	10176	10176	100
nat	A2001273	MOD13Q1	250m_16_days_NDVI	0.0798	0.2069	0.2446	0.22	0.0822	0.8649	0.7827	2488.74	0.0064	10176	10176	100
nat	A2001289	MOD13Q1	250m_16_days_NDVI	0.0752	0.1982	0.236	0.2135	-0.1092	0.8133	0.9225	2401.05	0.0057	10176	10176	100
nat	A2001305	MOD13Q1	250m_16_days_NDVI	0.0744	0.2	0.2323	0.2094	-0.1496	0.8397	0.9893	2363.47	0.0055	10176	10175	99.99
nat	A2001321	MOD13Q1	250m_16_days_NDVI	0.0755	0.3815	0.3647	0.3587	-0.0933	0.7851	0.8784	3710.84	0.0057	10176	10176	100
nat	A2001337	MOD13Q1	250m_16_days_NDVI	0.0774	0.4838	0.4841	0.4869	-0.1519	0.8656	1.0175	4925.57	0.006	10176	10175	99.99
nat	A2001353	MOD13Q1	250m_16_days_NDVI	0.0973	0.6586	0.6276	0.6532	0.0949	0.9775	0.8826	6206.42	0.0095	10176	9889	97.18
nat	A2002001	MOD13Q1	250m_16_days_NDVI	0.0969	0.6959	0.646	0.6619	-0.0448	0.8745	0.9193	6572.51	0.0094	10176	10174	99.98
nat	A2002017	MOD13Q1	250m_16_days_NDVI	0.0879	0.6916	0.637	0.6475	0.0819	0.8744	0.7925	6482.45	0.0077	10176	10176	100
nat	A2002033	MOD13Q1	250m_16_days_NDVI	0.093	0.6841	0.6641	0.6783	-0.1693	0.9338	1.1031	6755.19	0.0087	10176	10172	99.96
nat	A2002049	MOD13Q1	250m_16_days_NDVI	0.0926	0.78	0.7341	0.7491	0.0835	0.9365	0.853	7470.39	0.0086	10176	10176	100
nat	A2002065	MOD13Q1	250m_16_days_NDVI	0.0875	0.8004	0.748	0.7642	-0.0324	0.9219	0.9543	7611.47	0.0077	10176	10176	100
nat	A2002081	MOD13Q1	250m_16_days_NDVI	0.0877	0.7722	0.7445	0.7641	0.0637	0.9228	0.8591	7576.27	0.0077	10176	10176	100
nat	A2002097	MOD13Q1	250m_16_days_NDVI	0.1028	0.6089	0.6413	0.6634	0.0064	0.8751	0.8687	6522.22	0.0106	10176	10170	99.94
nat	A2002113	MOD13Q1	250m_16_days_NDVI	0.1198	0.5552	0.5458	0.5565	0.1876	0.8764	0.6888	5553.75	0.0144	10176	10176	100
nat	A2002129	MOD13Q1	250m_16_days_NDVI	0.1031	0.4762	0.4062	0.3976	0.0327	0.8379	0.8052	4129.31	0.0106	10176	10165	99.89
nat	A2002145	MOD13Q1	250m_16_days_NDVI	0.0909	0.2607	0.3028	0.2787	-0.0233	0.8845	0.9078	3079.02	0.0083	10176	10170	99.94
nat	A2002161	MOD13Q1	250m_16_days_NDVI	0.0874	0.2309	0.2723	0.2469	-0.1083	0.8679	0.9762	2770.74	0.0076	10176	10176	100
nat	A2002177	MOD13Q1	250m_16_days_NDVI	0.0885	0.2082	0.2584	0.2326	0.0761	0.859	0.7829	2629.09	0.0078	10176	10176	100
nat	A2002193	MOD13Q1	250m_16_days_NDVI	0.085	0.2071	0.2492	0.2244	0.0923	0.8953	0.803	2535.39	0.0072	10176	10176	100
nat	A2002209	MOD13Q1	250m_16_days_NDVI	0.0813	0.2055	0.2448	0.221	0.0144	0.8333	0.8189	2487.83	0.0066	10176	10164	99.88
nat	A2002225	MOD13Q1	250m_16_days_NDVI	0.0779	0.2208	0.241	0.2189	0.1017	0.8521	0.7504	2452.8	0.0061	10176	10176	100
nat	A2002241	MOD13Q1	250m_16_days_NDVI	0.0844	0.2071	0.2474	0.222	0.106	0.838	0.732	2517.14	0.0071	10176	10174	99.98
nat	A2002257	MOD13Q1	250m_16_days_NDVI	0.0831	0.2162	0.2416	0.2181	0.0135	0.8782	0.8647	2458.07	0.0069	10176	10176	100
nat	A2002273	MOD13Q1	250m_16_days_NDVI	0.0757	0.1928	0.2397	0.2189	-0.1246	0.8195	0.9441	2439.3	0.0057	10176	10176	100
nat	A2002289	MOD13Q1	250m_16_days_NDVI	0.0702	0.2171	0.2434	0.225	0.055	0.8549	0.7999	2476.66	0.0049	10176	10175	99.99
nat	A2002305	MOD13Q1	250m_16_days_NDVI	0.0653	0.208	0.2384	0.2225	-0.0913	0.7927	0.884	2359.16	0.0043	10176	9896	97.25
nat	A2002321	MOD13Q1	250m_16_days_NDVI	0.082	0.4394	0.4409	0.4403	0.0358	0.8164	0.7806	4485.26	0.0067	10176	10172	99.96
nat	A2002337	MOD13Q1	250m_16_days_NDVI	0.0996	0.4544	0.4779	0.4714	-0.0948	0.8131	0.9079	4862.81	0.0099	10176	10176	100
nat	A2002353	MOD13Q1	250m_16_days_NDVI	0.103	0.5401	0.5533	0.5644	-0.1713	0.8488	1.0201	5628.37	0.0106	10176	10172	99.96
nat	A2003001	MOD13Q1	250m_16_days_NDVI	0.1008	0.6688	0.5913	0.6018	-0.1904	0.9287	1.1191	6016.77	0.0102	10176	10176	100
nat	A2003017	MOD13Q1	250m_16_days_NDVI	0.0914	0.7121	0.7012	0.7186	-0.1772	0.8935	1.0707	7085.94	0.0084	10176	10105	99.3
nat	A2003033	MOD13Q1	250m_16_days_NDVI	0.0805	0.7463	0.7094	0.7188	0.0838	0.9146	0.8308	7218.89	0.0065	10176	10176	100
nat	A2003049	MOD13Q1	250m_16_days_NDVI	0.0806	0.7424	0.7386	0.7508	0.2147	0.918	0.7033	7511.89	0.0065	10176	10171	99.95
nat	A2003065	MOD13Q1	250m_16_days_NDVI	0.0808	0.7736	0.7451	0.7593	0.1594	0.9154	0.756	7582.44	0.0065	10176	10176	100
nat	A2003081	MOD13Q1	250m_16_days_NDVI	0.0839	0.7431	0.738	0.7568	0.139	0.8961	0.7571	7510.3	0.007	10176	10176	100
nat	A2003097	MOD13Q1	250m_16_days_NDVI	0.1122	0.7456	0.6793	0.71	0.0843	0.9004	0.8161	6912.02	0.0126	10176	10175	99.99
nat	A2003113	MOD13Q1	250m_16_days_NDVI	0.1327	0.6888	0.6016	0.6358	0.0859	0.9045	0.8186	6121.88	0.0176	10176	10176	100
nat	A2003129	MOD13Q1	250m_16_days_NDVI	0.1312	0.5963	0.5373	0.5631	0.1303	0.8676	0.7373	5463.75	0.0172	10176	10168	99.92
nat	A2003145	MOD13Q1	250m_16_days_NDVI	0.1055	0.4379	0.382	0.3734	-0.0377	0.8661	0.9038	3887.26	0.0111	10176	10176	100
nat	A2003161	MOD13Q1	250m_16_days_NDVI	0.0815	0.2635	0.2939	0.2774	0.1067	0.8017	0.695	2987.87	0.0066	10176	10165	99.89
nat	A2003177	MOD13Q1	250m_16_days_NDVI	0.0844	0.2529	0.2753	0.256	-0.0199	0.878	0.8979	2798.63	0.0071	10176	10164	99.88
nat	A2003193	MOD13Q1	250m_16_days_NDVI	0.0831	0.248	0.2641	0.243	0.0811	0.8366	0.7555	2687.71	0.0069	10176	10176	100
nat	A2003209	MOD13Q1	250m_16_days_NDVI	0.0812	0.2495	0.2671	0.2477	0.0735	0.8415	0.768	2717.02	0.0066	10176	10174	99.98
nat	A2003225	MOD13Q1	250m_16_days_NDVI	0.0818	0.2279	0.2704	0.2473	0.1002	0.823	0.7228	2751.1	0.0067	10176	10176	100
nat	A2003241	MOD13Q1	250m_16_days_NDVI	0.0795	0.2194	0.2594	0.2349	-0.048	0.8645	0.9125	2639.66	0.0063	10176	10176	100
nat	A2003257	MOD13Q1	250m_16_days_NDVI	0.079	0.2	0.2519	0.2273	-0.0397	0.8644	0.9041	2562.2	0.0062	10176	10172	99.96
nat	A2003273	MOD13Q1	250m_16_days_NDVI	0.0765	0.2127	0.248	0.2247	0.0988	0.8673	0.7685	2524.1	0.0059	10176	10176	100
nat	A2003289	MOD13Q1	250m_16_days_NDVI	0.0719	0.2068	0.244	0.2229	0.1055	0.8165	0.711	2483.11	0.0052	10176	10176	100
nat	A2003305	MOD13Q1	250m_16_days_NDVI	0.0837	0.233	0.299	0.2863	0.0165	0.8218	0.8053	2718.75	0.007	10176	9092	89.35
nat	A2003321	MOD13Q1	250m_16_days_NDVI	0.0905	0.3928	0.3496	0.3427	0.0305	0.836	0.8055	3488.02	0.0082	10176	9978	98.05
nat	A2003337	MOD13Q1	250m_16_days_NDVI	0.1053	0.517	0.4769	0.4786	0.0675	0.8428	0.7753	4853.39	0.0111	10176	10176	100
nat	A2003353	MOD13Q1	250m_16_days_NDVI	0.1086	0.5967	0.5323	0.5353	0.0209	0.8803	0.8594	5417.15	0.0118	10176	10176	100
nat	A2004001	MOD13Q1	250m_16_days_NDVI	0.1077	0.5967	0.5321	0.5347	0.0272	0.8775	0.8503	5414.05	0.0116	10176	10175	99.99
nat	A2004017	MOD13Q1	250m_16_days_NDVI	0.105	0.6669	0.6221	0.6262	-0.1968	0.9112	1.108	6328.97	0.011	10176	10174	99.98
nat	A2004033	MOD13Q1	250m_16_days_NDVI	0.0938	0.6928	0.6471	0.6525	-0.0546	0.9194	0.974	6585.31	0.0088	10176	10176	100
nat	A2004049	MOD13Q1	250m_16_days_NDVI	0.093	0.7206	0.6997	0.7148	0.1304	0.9033	0.7729	7110.51	0.0087	10176	10162	99.86
nat	A2004065	MOD13Q1	250m_16_days_NDVI	0.0788	0.7438	0.7285	0.738	0.1986	0.9166	0.718	7413.68	0.0062	10176	10176	100
nat	A2004081	MOD13Q1	250m_16_days_NDVI	0.0997	0.725	0.6921	0.714	-0.1684	0.8998	1.0682	7042.77	0.0099	10176	10176	100
nat	A2004097	MOD13Q1	250m_16_days_NDVI	0.1154	0.6482	0.5907	0.6203	-0.1078	0.8618	0.9696	6009.08	0.0133	10176	10172	99.96
nat	A2004113	MOD13Q1	250m_16_days_NDVI	0.1152	0.5787	0.5017	0.5188	-0.116	0.846	0.962	5104.92	0.0133	10176	10176	100
nat	A2004129	MOD13Q1	250m_16_days_NDVI	0.0796	0.333	0.3471	0.3398	0.0624	0.8224	0.76	3531	0.0063	10176	10174	99.98
nat	A2004145	MOD13Q1	250m_16_days_NDVI	0.0796	0.3001	0.3092	0.2938	-0.0378	0.8315	0.8693	3146.67	0.0063	10176	10176	100
nat	A2004161	MOD13Q1	250m_16_days_NDVI	0.0771	0.2425	0.2733	0.2541	-0.0648	0.8678	0.9326	2781.41	0.006	10176	10176	100
nat	A2004177	MOD13Q1	250m_16_days_NDVI	0.0781	0.2225	0.2632	0.2423	0.1006	0.8193	0.7187	2677.88	0.0061	10176	10176	100
nat	A2004193	MOD13Q1	250m_16_days_NDVI	0.0804	0.2283	0.2569	0.2355	-0.0863	0.8332	0.9195	2614.66	0.0065	10176	10176	100
nat	A2004209	MOD13Q1	250m_16_days_NDVI	0.0785	0.2128	0.2575	0.2362	-0.0028	0.8242	0.827	2619.36	0.0062	10176	10174	99.98
nat	A2004225	MOD13Q1	250m_16_days_NDVI	0.076	0.2145	0.2543	0.2338	0.1158	0.8273	0.7115	2588.09	0.0058	10176	10176	100
nat	A2004241	MOD13Q1	250m_16_days_NDVI	0.075	0.2204	0.2509	0.2309	0.0997	0.7951	0.6954	2553.48	0.0056	10176	10176	100
nat	A2004257	MOD13Q1	250m_16_days_NDVI	0.0749	0.2177	0.2547	0.2339	0.0926	0.8201	0.7275	2592.03	0.0056	10176	10176	100
nat	A2004273	MOD13Q1	250m_16_days_NDVI	0.0769	0.1955	0.2444	0.2224	0.1048	0.824	0.7192	2487.23	0.0059	10176	10176	100
nat	A2004289	MOD13Q1	250m_16_days_NDVI	0.0922	0.2111	0.2703	0.2377	-0.1066	0.8133	0.9199	2743.51	0.0085	10176	10151	99.75
nat	A2004305	MOD13Q1	250m_16_days_NDVI	0.0726	0.4888	0.4735	0.4792	0.0987	0.8189	0.7202	4818.33	0.0053	10176	10176	100
nat	A2004321	MOD13Q1	250m_16_days_NDVI	0.0813	0.6271	0.6099	0.6213	-0.1213	0.8577	0.979	6205.93	0.0066	10176	10176	100
nat	A2004337	MOD13Q1	250m_16_days_NDVI	0.0868	0.6116	0.6216	0.6355	0.1005	0.8474	0.7469	6325.52	0.0075	10176	10176	100
nat	A2004353	MOD13Q1	250m_16_days_NDVI	0.0875	0.6929	0.6567	0.6737	0.0222	0.8647	0.8425	6682.85	0.0076	10176	10176	100
nat	A2005001	MOD13Q1	250m_16_days_NDVI	0.1005	0.7433	0.6824	0.7044	-0.046	0.8867	0.9327	6941.74	0.0101	10176	10173	99.97
nat	A2005017	MOD13Q1	250m_16_days_NDVI	0.0876	0.7108	0.6981	0.7123	-0.136	0.91	1.046	7101.56	0.0077	10176	10172	99.96
nat	A2005033	MOD13Q1	250m_16_days_NDVI	0.0915	0.7064	0.7045	0.7217	-0.0705	0.9058	0.9763	7169.17	0.0084	10176	10176	100
nat	A2005049	MOD13Q1	250m_16_days_NDVI	0.0812	0.8109	0.7648	0.7824	0.1173	0.9059	0.7886	7781.51	0.0066	10176	10175	99.99
nat	A2005065	MOD13Q1	250m_16_days_NDVI	0.0856	0.8115	0.7727	0.7912	-0.0872	0.9058	0.993	7862.5	0.0073	10176	10176	100
nat	A2005081	MOD13Q1	250m_16_days_NDVI	0.0956	0.8097	0.7622	0.7842	0.1027	0.9109	0.8082	7756.41	0.0091	10176	10176	100
nat	A2005097	MOD13Q1	250m_16_days_NDVI	0.0915	0.743	0.7173	0.7411	-0.0442	0.8758	0.92	7299.28	0.0084	10176	10176	100
nat	A2005113	MOD13Q1	250m_16_days_NDVI	0.1221	0.7014	0.6301	0.6555	-0.0738	0.8581	0.9319	6411.91	0.0149	10176	10176	100
nat	A2005129	MOD13Q1	250m_16_days_NDVI	0.1287	0.5668	0.5305	0.544	0.0829	0.8472	0.7643	5398.23	0.0166	10176	10176	100
nat	A2005145	MOD13Q1	250m_16_days_NDVI	0.105	0.3333	0.4004	0.3908	-0.1144	0.8313	0.9457	4072.67	0.011	10176	10172	99.96
nat	A2005161	MOD13Q1	250m_16_days_NDVI	0.0846	0.3153	0.3086	0.2933	0.0828	0.8613	0.7785	3140.41	0.0072	10176	10176	100
nat	A2005177	MOD13Q1	250m_16_days_NDVI	0.0847	0.2349	0.2748	0.2522	0.0132	0.8238	0.8106	2795.89	0.0072	10176	10174	99.98
nat	A2005193	MOD13Q1	250m_16_days_NDVI	0.084	0.2199	0.2645	0.2408	0.0059	0.8411	0.8352	2691.15	0.0071	10176	10174	99.98
nat	A2005209	MOD13Q1	250m_16_days_NDVI	0.0811	0.2129	0.2533	0.2301	-0.1722	0.8519	1.0241	2577.45	0.0066	10176	10176	100
nat	A2005225	MOD13Q1	250m_16_days_NDVI	0.0779	0.2172	0.2556	0.234	0.066	0.7878	0.7218	2601.06	0.0061	10176	10176	100
nat	A2005241	MOD13Q1	250m_16_days_NDVI	0.0761	0.2242	0.2532	0.232	-0.0343	0.8156	0.8499	2575.2	0.0058	10176	10172	99.96
nat	A2005257	MOD13Q1	250m_16_days_NDVI	0.0739	0.2295	0.2562	0.235	0.0728	0.8397	0.7669	2606.81	0.0055	10176	10176	100
nat	A2005273	MOD13Q1	250m_16_days_NDVI	0.0766	0.2122	0.2479	0.2259	0.0862	0.8365	0.7503	2522.1	0.0059	10176	10174	99.98
nat	A2005289	MOD13Q1	250m_16_days_NDVI	0.0707	0.2108	0.246	0.2268	-0.1827	0.7605	0.9432	2502.66	0.005	10176	10175	99.99
nat	A2005305	MOD13Q1	250m_16_days_NDVI	0.071	0.2101	0.2438	0.2263	0.0112	0.7997	0.7885	2003.47	0.005	10176	8216	80.74
nat	A2005321	MOD13Q1	250m_16_days_NDVI	0.0695	0.2037	0.2381	0.2182	-0.0173	0.7905	0.8078	2096.66	0.0048	10176	8806	86.54
nat	A2005337	MOD13Q1	250m_16_days_NDVI	0.0681	0.2058	0.2516	0.2355	-0.1356	0.7812	0.9168	2215.74	0.0046	10176	8808	86.56
nat	A2005353	MOD13Q1	250m_16_days_NDVI	0.1012	0.3506	0.3893	0.3895	0.0801	0.7548	0.6747	2252.8	0.0102	10176	5787	56.87
nat	A2006001	MOD13Q1	250m_16_days_NDVI	0.0924	0.4911	0.4879	0.4869	-0.1298	0.826	0.9558	4964.96	0.0085	10176	10176	100
nat	A2006017	MOD13Q1	250m_16_days_NDVI	0.0908	0.4575	0.5059	0.5045	0.0242	0.8311	0.8069	5148.47	0.0082	10176	10176	100
nat	A2006033	MOD13Q1	250m_16_days_NDVI	0.0984	0.6353	0.62	0.6215	0.138	0.9031	0.7651	6306.86	0.0097	10176	10173	99.97
nat	A2006049	MOD13Q1	250m_16_days_NDVI	0.0939	0.6517	0.6288	0.6319	-0.0749	0.9078	0.9827	6397.79	0.0088	10176	10175	99.99
nat	A2006065	MOD13Q1	250m_16_days_NDVI	0.1037	0.726	0.7026	0.7163	-0.1321	0.9146	1.0467	7149.2	0.0107	10176	10176	100
nat	A2006081	MOD13Q1	250m_16_days_NDVI	0.1444	0.6531	0.6814	0.7073	-0.1448	0.9968	1.1416	5359.56	0.0208	10176	7866	77.3
nat	A2006097	MOD13Q1	250m_16_days_NDVI	0.0946	0.7493	0.7444	0.764	-0.1644	0.908	1.0724	7574.69	0.009	10176	10175	99.99
nat	A2006113	MOD13Q1	250m_16_days_NDVI	0.0874	0.751	0.7206	0.743	0.1196	0.8783	0.7587	7332.4	0.0076	10176	10176	100
nat	A2006129	MOD13Q1	250m_16_days_NDVI	0.1178	0.6516	0.5832	0.6139	-0.1188	0.8579	0.9767	5934.94	0.0139	10176	10176	100
nat	A2006145	MOD13Q1	250m_16_days_NDVI	0.1062	0.4254	0.3932	0.3954	0.1043	0.8368	0.7325	4001.28	0.0113	10176	10176	100
nat	A2006161	MOD13Q1	250m_16_days_NDVI	0.0899	0.2324	0.2958	0.2847	-0.0967	0.8369	0.9336	3010.13	0.0081	10176	10176	100
nat	A2006177	MOD13Q1	250m_16_days_NDVI	0.0893	0.2435	0.2741	0.2568	-0.0628	0.8227	0.8855	2788.89	0.008	10176	10176	100
nat	A2006193	MOD13Q1	250m_16_days_NDVI	0.0865	0.1926	0.2643	0.245	0.0947	0.8056	0.7109	2689.05	0.0075	10176	10176	100
nat	A2006209	MOD13Q1	250m_16_days_NDVI	0.0805	0.2285	0.2582	0.2412	-0.1427	0.7918	0.9345	2626.98	0.0065	10176	10176	100
nat	A2006225	MOD13Q1	250m_16_days_NDVI	0.0777	0.25	0.2561	0.2407	0.0348	0.7784	0.7436	2606.27	0.006	10176	10176	100
nat	A2006241	MOD13Q1	250m_16_days_NDVI	0.0753	0.2458	0.254	0.2374	-0.0252	0.8148	0.84	2584.17	0.0057	10176	10174	99.98
nat	A2006257	MOD13Q1	250m_16_days_NDVI	0.0718	0.222	0.2498	0.2352	-0.1051	0.7585	0.8636	2542.47	0.0052	10176	10176	100
nat	A2006273	MOD13Q1	250m_16_days_NDVI	0.0717	0.2255	0.2525	0.2348	0.0176	0.8156	0.798	2569.1	0.0051	10176	10176	100
nat	A2006289	MOD13Q1	250m_16_days_NDVI	0.0695	0.2197	0.2461	0.2287	0.0752	0.7736	0.6984	2504.51	0.0048	10176	10176	100
nat	A2006305	MOD13Q1	250m_16_days_NDVI	0.0778	0.21	0.2561	0.2399	0.0275	0.7968	0.7693	2566.15	0.006	10176	10022	98.49
nat	A2006321	MOD13Q1	250m_16_days_NDVI	0.086	0.3714	0.3815	0.3765	0.0564	0.8334	0.777	3881.73	0.0074	10176	10176	100
nat	A2006337	MOD13Q1	250m_16_days_NDVI	0.0932	0.3705	0.3836	0.3793	0.0098	0.8445	0.8347	3903.06	0.0087	10176	10175	99.99
nat	A2006353	MOD13Q1	250m_16_days_NDVI	0.0878	0.4112	0.4134	0.4119	-0.1529	0.7885	0.9414	4207.01	0.0077	10176	10176	100
nat	A2007001	MOD13Q1	250m_16_days_NDVI	0.0861	0.4434	0.4242	0.4234	-0.0496	0.8161	0.8657	4316.53	0.0074	10176	10176	100
nat	A2007017	MOD13Q1	250m_16_days_NDVI	0.082	0.4318	0.4032	0.4021	-0.0156	0.7568	0.7724	4098.5	0.0067	10176	10164	99.88
nat	A2007033	MOD13Q1	250m_16_days_NDVI	0.0947	0.5833	0.5221	0.5294	-0.1903	0.8491	1.0394	5312.71	0.009	10176	10176	100
nat	A2007049	MOD13Q1	250m_16_days_NDVI	0.0892	0.6097	0.5859	0.5963	-0.1158	0.8669	0.9827	5958.72	0.008	10176	10170	99.94
nat	A2007065	MOD13Q1	250m_16_days_NDVI	0.0976	0.6641	0.6164	0.6325	-0.0286	0.9074	0.936	6264.69	0.0095	10176	10164	99.88
nat	A2007081	MOD13Q1	250m_16_days_NDVI	0.1049	0.6278	0.5813	0.5974	0.1183	0.8819	0.7636	5914.98	0.011	10176	10176	100
nat	A2007097	MOD13Q1	250m_16_days_NDVI	0.1082	0.4389	0.4713	0.4749	-0.0136	0.8614	0.875	4796.3	0.0117	10176	10176	100
nat	A2007113	MOD13Q1	250m_16_days_NDVI	0.1143	0.401	0.4203	0.4168	0.0619	0.9029	0.841	4277.43	0.0131	10176	10176	100
nat	A2007129	MOD13Q1	250m_16_days_NDVI	0.0938	0.3109	0.3237	0.3098	-0.0633	0.8531	0.9164	3294.23	0.0088	10176	10176	100
nat	A2007145	MOD13Q1	250m_16_days_NDVI	0.0916	0.2636	0.2792	0.2596	0.04	0.8726	0.8326	2839.95	0.0084	10176	10172	99.96
nat	A2007161	MOD13Q1	250m_16_days_NDVI	0.0938	0.2315	0.2629	0.2406	0.0743	0.8906	0.8163	2674.93	0.0088	10176	10176	100
nat	A2007177	MOD13Q1	250m_16_days_NDVI	0.0938	0.2087	0.254	0.2308	-0.1294	0.8904	1.0198	2585.01	0.0088	10176	10176	100
nat	A2007193	MOD13Q1	250m_16_days_NDVI	0.0943	0.2324	0.2582	0.2351	0.071	0.8555	0.7845	2627.17	0.0089	10176	10176	100
nat	A2007209	MOD13Q1	250m_16_days_NDVI	0.0897	0.2111	0.2535	0.2321	-0.0143	0.8815	0.8958	2578.55	0.008	10176	10170	99.94
nat	A2007225	MOD13Q1	250m_16_days_NDVI	0.088	0.2241	0.25	0.2285	0.0583	0.8491	0.7908	2544.21	0.0077	10176	10176	100
nat	A2007241	MOD13Q1	250m_16_days_NDVI	0.0826	0.2223	0.2453	0.2251	-0.0214	0.8723	0.8937	2494.2	0.0068	10176	10167	99.91
nat	A2007257	MOD13Q1	250m_16_days_NDVI	0.0808	0.2247	0.2544	0.2352	0.0771	0.8713	0.7942	2588.35	0.0065	10176	10175	99.99
nat	A2007273	MOD13Q1	250m_16_days_NDVI	0.0857	0.2154	0.2573	0.2324	-0.0155	0.9131	0.9286	2617.51	0.0073	10176	10174	99.98
nat	A2007289	MOD13Q1	250m_16_days_NDVI	0.0785	0.2246	0.2751	0.255	0.0705	0.895	0.8245	2799.11	0.0062	10176	10176	100
nat	A2007305	MOD13Q1	250m_16_days_NDVI	0.0839	0.2288	0.2811	0.2567	0.0034	0.8518	0.8484	2860.72	0.007	10176	10176	100
nat	A2007321	MOD13Q1	250m_16_days_NDVI	0.0859	0.2647	0.3117	0.2936	-0.1365	0.8381	0.9746	3171.08	0.0074	10176	10174	99.98
nat	A2007337	MOD13Q1	250m_16_days_NDVI	0.0853	0.311	0.3216	0.3074	-0.0306	0.8329	0.8635	3273.11	0.0073	10176	10176	100
nat	A2007353	MOD13Q1	250m_16_days_NDVI	0.087	0.3706	0.374	0.3653	-0.1553	0.8213	0.9766	3805.73	0.0076	10176	10176	100
nat	A2008001	MOD13Q1	250m_16_days_NDVI	0.0937	0.47	0.4436	0.4465	-0.156	0.772	0.928	4513.91	0.0088	10176	10176	100
nat	A2008017	MOD13Q1	250m_16_days_NDVI	0.0988	0.5142	0.5076	0.5136	-0.1586	0.825	0.9836	5165.57	0.0098	10176	10176	100
nat	A2008033	MOD13Q1	250m_16_days_NDVI	0.1006	0.5897	0.5623	0.5706	-0.0843	0.8694	0.9537	5721.42	0.0101	10176	10175	99.99
nat	A2008049	MOD13Q1	250m_16_days_NDVI	0.1044	0.7478	0.6766	0.6927	0.1003	0.9228	0.8225	6884.75	0.0109	10176	10176	100
nat	A2008065	MOD13Q1	250m_16_days_NDVI	0.0959	0.7365	0.7081	0.7238	-0.1454	0.9263	1.0717	7201.1	0.0092	10176	10170	99.94
nat	A2008081	MOD13Q1	250m_16_days_NDVI	0.0927	0.7745	0.718	0.7372	0.1425	0.9008	0.7583	7305.93	0.0086	10176	10176	100
nat	A2008097	MOD13Q1	250m_16_days_NDVI	0.1026	0.6541	0.6151	0.6353	0.1514	0.8428	0.6914	6257.61	0.0105	10176	10173	99.97
nat	A2008113	MOD13Q1	250m_16_days_NDVI	0.1077	0.6004	0.4984	0.5077	-0.0983	0.8753	0.9736	5071.71	0.0116	10176	10176	100
nat	A2008129	MOD13Q1	250m_16_days_NDVI	0.0916	0.4174	0.3901	0.3812	-0.0291	0.8087	0.8378	3969.44	0.0084	10176	10176	100
nat	A2008145	MOD13Q1	250m_16_days_NDVI	0.077	0.3148	0.3171	0.3045	0.0106	0.8597	0.8491	3226.4	0.0059	10176	10176	100
nat	A2008161	MOD13Q1	250m_16_days_NDVI	0.08	0.2575	0.2994	0.2826	-0.0406	0.8776	0.9182	3046.78	0.0064	10176	10176	100
nat	A2008177	MOD13Q1	250m_16_days_NDVI	0.0723	0.254	0.2836	0.2685	-0.176	0.8521	1.0281	2885.85	0.0052	10176	10176	100
nat	A2008193	MOD13Q1	250m_16_days_NDVI	0.0761	0.2535	0.2768	0.2599	0.0768	0.8448	0.768	2817.2	0.0058	10176	10176	100
nat	A2008209	MOD13Q1	250m_16_days_NDVI	0.0793	0.2437	0.2762	0.258	-0.0081	0.8851	0.8932	2810.6	0.0063	10176	10176	100
nat	A2008225	MOD13Q1	250m_16_days_NDVI	0.0763	0.2517	0.2698	0.2523	0.0835	0.8154	0.7319	2745.34	0.0058	10176	10176	100
nat	A2008241	MOD13Q1	250m_16_days_NDVI	0.0715	0.2441	0.2637	0.2477	0.0132	0.8519	0.8387	2683.55	0.0051	10176	10176	100
nat	A2008257	MOD13Q1	250m_16_days_NDVI	0.0718	0.244	0.2689	0.2535	0.0845	0.823	0.7385	2735.28	0.0052	10176	10174	99.98
nat	A2008273	MOD13Q1	250m_16_days_NDVI	0.0714	0.2356	0.2704	0.2532	0.086	0.8417	0.7557	2751.72	0.0051	10176	10176	100
nat	A2008289	MOD13Q1	250m_16_days_NDVI	0.0634	0.2325	0.2604	0.2458	0.0666	0.8031	0.7365	2649.1	0.004	10176	10175	99.99
nat	A2008305	MOD13Q1	250m_16_days_NDVI	0.0868	0.3333	0.3443	0.3455	-0.0306	0.8125	0.8431	3482	0.0075	10176	10114	99.39
nat	A2008321	MOD13Q1	250m_16_days_NDVI	0.096	0.4075	0.3608	0.368	0.0261	0.8257	0.7996	3671.29	0.0092	10176	10176	100
nat	A2008337	MOD13Q1	250m_16_days_NDVI	0.0946	0.4112	0.3894	0.3956	-0.134	0.8023	0.9363	3962.45	0.009	10176	10176	100
nat	A2008353	MOD13Q1	250m_16_days_NDVI	0.0974	0.4444	0.4225	0.4273	-0.1698	0.7197	0.8895	4299.75	0.0095	10176	10176	100
nat	A2009001	MOD13Q1	250m_16_days_NDVI	0.0945	0.516	0.4633	0.4713	-0.0199	0.7586	0.7785	4715.03	0.0089	10176	10176	100
nat	A2009017	MOD13Q1	250m_16_days_NDVI	0.0953	0.6102	0.5397	0.5543	-0.0058	0.8416	0.8474	5492.13	0.0091	10176	10176	100
nat	A2009033	MOD13Q1	250m_16_days_NDVI	0.1029	0.6018	0.5648	0.5853	-0.1451	0.8906	1.0357	5744.87	0.0106	10176	10172	99.96
nat	A2009049	MOD13Q1	250m_16_days_NDVI	0.1107	0.7088	0.6237	0.6444	0.0258	0.9251	0.8993	6324.18	0.0123	10176	10140	99.65
nat	A2009065	MOD13Q1	250m_16_days_NDVI	0.0862	0.6901	0.6723	0.6863	-0.1043	0.9106	1.0149	6840.83	0.0074	10176	10176	100
nat	A2009081	MOD13Q1	250m_16_days_NDVI	0.0867	0.7381	0.6844	0.7028	0.091	0.8874	0.7964	6962.03	0.0075	10176	10172	99.96
nat	A2009097	MOD13Q1	250m_16_days_NDVI	0.1181	0.62	0.6005	0.628	0.0938	0.8945	0.8007	6110.22	0.014	10176	10176	100
nat	A2009113	MOD13Q1	250m_16_days_NDVI	0.1202	0.5269	0.4614	0.4625	-0.0469	0.8617	0.9086	4692.25	0.0144	10176	10169	99.93
nat	A2009129	MOD13Q1	250m_16_days_NDVI	0.1034	0.2839	0.3417	0.3231	-0.1169	0.8643	0.9812	3477.2	0.0107	10176	10176	100
nat	A2009145	MOD13Q1	250m_16_days_NDVI	0.0895	0.233	0.2752	0.2522	0.0043	0.865	0.8607	2799.72	0.008	10176	10174	99.98
nat	A2009161	MOD13Q1	250m_16_days_NDVI	0.0904	0.2152	0.2551	0.23	-0.1108	0.8668	0.9776	2595.93	0.0082	10176	10176	100
nat	A2009177	MOD13Q1	250m_16_days_NDVI	0.0891	0.2018	0.2504	0.2253	-0.0846	0.8534	0.938	2547.58	0.0079	10176	10176	100
nat	A2009193	MOD13Q1	250m_16_days_NDVI	0.0904	0.1972	0.244	0.2182	-0.0918	0.8417	0.9335	2483.1	0.0082	10176	10176	100
nat	A2009209	MOD13Q1	250m_16_days_NDVI	0.0828	0.2033	0.2434	0.2195	-0.087	0.8303	0.9173	2476.5	0.0069	10176	10176	100
nat	A2009225	MOD13Q1	250m_16_days_NDVI	0.0819	0.2	0.2394	0.2155	-0.0089	0.8533	0.8622	2436.64	0.0067	10176	10176	100
nat	A2009241	MOD13Q1	250m_16_days_NDVI	0.0813	0.2047	0.2393	0.2161	0.0406	0.8405	0.7999	2435.61	0.0066	10176	10176	100
nat	A2009257	MOD13Q1	250m_16_days_NDVI	0.0856	0.2047	0.2468	0.2206	0.0957	0.8766	0.7809	2508.88	0.0073	10176	10164	99.88
nat	A2009273	MOD13Q1	250m_16_days_NDVI	0.0759	0.2	0.2281	0.2062	-0.1259	0.8445	0.9704	2317.9	0.0058	10176	10164	99.88
nat	A2009289	MOD13Q1	250m_16_days_NDVI	0.09	0.4692	0.4599	0.4614	-0.1717	0.8589	1.0306	4679.73	0.0081	10176	10176	100
nat	A2009305	MOD13Q1	250m_16_days_NDVI	0.1022	0.4874	0.4877	0.4968	-0.0623	0.8856	0.9479	4962.45	0.0104	10176	10176	100
nat	A2009321	MOD13Q1	250m_16_days_NDVI	0.1147	0.506	0.4675	0.4824	0.0989	0.8673	0.7684	4757.26	0.0132	10176	10175	99.99
nat	A2009337	MOD13Q1	250m_16_days_NDVI	0.116	0.5303	0.4478	0.4686	-0.1151	0.7974	0.9125	4555.68	0.0134	10176	10174	99.98
nat	A2009353	MOD13Q1	250m_16_days_NDVI	0.1026	0.5857	0.5413	0.5557	-0.1791	0.8282	1.0073	5501.28	0.0105	10176	10164	99.88
nat	A2010001	MOD13Q1	250m_16_days_NDVI	0.0932	0.6504	0.6192	0.6361	-0.177	0.8611	1.0381	6285.26	0.0087	10176	10151	99.75
nat	A2010017	MOD13Q1	250m_16_days_NDVI	0.1036	0.6923	0.6599	0.6761	-0.1187	0.9663	1.085	6641.5	0.0107	10176	10065	98.91
nat	A2010033	MOD13Q1	250m_16_days_NDVI	0.0898	0.7386	0.6888	0.7054	-0.1184	0.893	1.0114	7009.65	0.0081	10176	10176	100
nat	A2010049	MOD13Q1	250m_16_days_NDVI	0.0975	0.7641	0.7194	0.7442	0.1317	0.8976	0.7659	7297.97	0.0095	10176	10144	99.69
nat	A2010065	MOD13Q1	250m_16_days_NDVI	0.0825	0.776	0.7504	0.766	0.188	0.9146	0.7266	7636.29	0.0068	10176	10176	100
nat	A2010081	MOD13Q1	250m_16_days_NDVI	0.0926	0.7195	0.724	0.7444	-0.0402	0.8888	0.929	7365.82	0.0086	10176	10174	99.98
nat	A2010097	MOD13Q1	250m_16_days_NDVI	0.0963	0.7492	0.699	0.7216	0.0454	0.8895	0.8441	7113.3	0.0093	10176	10176	100
nat	A2010113	MOD13Q1	250m_16_days_NDVI	0.1093	0.6637	0.6401	0.665	0.127	0.877	0.75	6511.98	0.0119	10176	10173	99.97
nat	A2010129	MOD13Q1	250m_16_days_NDVI	0.1267	0.526	0.4903	0.4853	0.0916	0.8005	0.7089	4989.42	0.0161	10176	10176	100
nat	A2010145	MOD13Q1	250m_16_days_NDVI	0.1019	0.3522	0.361	0.3394	-0.1096	0.8678	0.9774	3670.68	0.0104	10176	10167	99.91
nat	A2010161	MOD13Q1	250m_16_days_NDVI	0.0876	0.243	0.2957	0.2714	0.0344	0.8659	0.8315	3008.26	0.0077	10176	10174	99.98
nat	A2010177	MOD13Q1	250m_16_days_NDVI	0.1502	0.2452	0.362	0.303	0.0859	0.8585	0.7726	3683.28	0.0225	10176	10176	100
nat	A2010193	MOD13Q1	250m_16_days_NDVI	0.0848	0.2176	0.2601	0.2374	-0.0351	0.8403	0.8754	2646.52	0.0072	10176	10175	99.99
nat	A2010209	MOD13Q1	250m_16_days_NDVI	0.0828	0.2053	0.2583	0.236	0.1036	0.8363	0.7327	2627.83	0.0069	10176	10174	99.98
nat	A2010225	MOD13Q1	250m_16_days_NDVI	0.0793	0.2096	0.2575	0.2365	0.0004	0.8451	0.8447	2620.31	0.0063	10176	10176	100
nat	A2010241	MOD13Q1	250m_16_days_NDVI	0.0795	0.2145	0.2511	0.2299	0.0946	0.8517	0.7571	2555.29	0.0063	10176	10176	100
nat	A2010257	MOD13Q1	250m_16_days_NDVI	0.0731	0.2396	0.2558	0.2382	-0.0229	0.8467	0.8696	2602.69	0.0053	10176	10174	99.98
nat	A2010273	MOD13Q1	250m_16_days_NDVI	0.0718	0.2258	0.2493	0.2308	-0.1322	0.8382	0.9704	2536.97	0.0052	10176	10176	100
nat	A2010289	MOD13Q1	250m_16_days_NDVI	0.067	0.2259	0.2407	0.2257	0.0651	0.8274	0.7623	2432.08	0.0045	10176	10105	99.3
nat	A2010305	MOD13Q1	250m_16_days_NDVI	0.0924	0.3523	0.3212	0.3105	0.0497	0.8647	0.815	3268.45	0.0085	10176	10176	100
nat	A2010321	MOD13Q1	250m_16_days_NDVI	0.0877	0.3027	0.3332	0.3221	-0.1925	0.8437	1.0362	3389.95	0.0077	10176	10174	99.98
nat	A2010337	MOD13Q1	250m_16_days_NDVI	0.0879	0.5031	0.4573	0.4565	0.0881	0.8446	0.7565	4653.47	0.0077	10176	10176	100
nat	A2010353	MOD13Q1	250m_16_days_NDVI	0.0909	0.511	0.5037	0.5076	-0.0007	0.8453	0.846	5126.11	0.0083	10176	10176	100
nat	A2011001	MOD13Q1	250m_16_days_NDVI	0.0877	0.4801	0.5211	0.525	-0.0829	0.8287	0.9116	5227.99	0.0077	10176	10032	98.58
nat	A2011017	MOD13Q1	250m_16_days_NDVI	0.0871	0.5922	0.5835	0.5898	0.1205	0.8807	0.7602	5937.21	0.0076	10176	10176	100
nat	A2011033	MOD13Q1	250m_16_days_NDVI	0.0842	0.681	0.6416	0.6512	-0.0858	0.9048	0.9906	6528.53	0.0071	10176	10176	100
nat	A2011049	MOD13Q1	250m_16_days_NDVI	0.0942	0.6867	0.6418	0.6567	-0.0914	0.8904	0.9818	6530.58	0.0089	10176	10176	100
nat	A2011065	MOD13Q1	250m_16_days_NDVI	0.1062	0.6851	0.6666	0.6924	-0.121	0.9059	1.0269	6780.35	0.0113	10176	10171	99.95
nat	A2011081	MOD13Q1	250m_16_days_NDVI	0.0865	0.7621	0.7136	0.7302	0.147	0.9063	0.7593	7261.87	0.0075	10176	10176	100
nat	A2011097	MOD13Q1	250m_16_days_NDVI	0.0919	0.7622	0.701	0.7234	0.1561	0.9178	0.7617	7133.1	0.0085	10176	10175	99.99
nat	A2011113	MOD13Q1	250m_16_days_NDVI	0.1117	0.6925	0.6237	0.6515	-0.0184	0.8658	0.8842	6343.54	0.0125	10176	10171	99.95
nat	A2011129	MOD13Q1	250m_16_days_NDVI	0.1098	0.5431	0.4844	0.4923	0.1105	0.8604	0.7499	4929.06	0.0121	10176	10176	100
nat	A2011145	MOD13Q1	250m_16_days_NDVI	0.0976	0.3016	0.35	0.3401	-0.0849	0.8439	0.9288	3561.82	0.0095	10176	10176	100
nat	A2011161	MOD13Q1	250m_16_days_NDVI	0.101	0.237	0.286	0.2614	0.1084	0.8507	0.7423	2909.98	0.0102	10176	10176	100
nat	A2011177	MOD13Q1	250m_16_days_NDVI	0.1004	0.2002	0.2605	0.2349	0.0846	0.8486	0.764	2650.48	0.0101	10176	10176	100
nat	A2011193	MOD13Q1	250m_16_days_NDVI	0.1027	0.1615	0.2396	0.2086	0.095	0.8284	0.7334	2436.7	0.0106	10176	10172	99.96
nat	A2011209	MOD13Q1	250m_16_days_NDVI	0.0975	0.1705	0.2358	0.207	0.101	0.812	0.711	2399.27	0.0095	10176	10176	100
nat	A2011225	MOD13Q1	250m_16_days_NDVI	0.0965	0.195	0.2341	0.2074	0.0951	0.7934	0.6983	2382.36	0.0093	10176	10176	100
nat	A2011241	MOD13Q1	250m_16_days_NDVI	0.0913	0.188	0.2323	0.2072	0.0743	0.8305	0.7562	2363.7	0.0083	10176	10176	100
nat	A2011257	MOD13Q1	250m_16_days_NDVI	0.0893	0.2	0.2347	0.2131	-0.0201	0.8039	0.824	2386.93	0.008	10176	10172	99.96
nat	A2011273	MOD13Q1	250m_16_days_NDVI	0.0923	0.2355	0.2655	0.2437	-0.0483	0.8659	0.9142	2701.64	0.0085	10176	10174	99.98
nat	A2011289	MOD13Q1	250m_16_days_NDVI	0.0901	0.25	0.2835	0.2668	0.0967	0.8481	0.7514	2884.74	0.0081	10176	10176	100
nat	A2011305	MOD13Q1	250m_16_days_NDVI	0.0841	0.2196	0.2576	0.2386	0.033	0.7877	0.7547	2609.17	0.0071	10176	10128	99.53
nat	A2011321	MOD13Q1	250m_16_days_NDVI	0.0936	0.2087	0.275	0.2631	0.0481	0.7459	0.6978	2784.45	0.0088	10176	10125	99.5
nat	A2011337	MOD13Q1	250m_16_days_NDVI	0.0873	0.2523	0.273	0.2627	0.0625	0.7159	0.6534	2774.02	0.0076	10176	10161	99.85
nat	A2011353	MOD13Q1	250m_16_days_NDVI	0.0821	0.2241	0.2633	0.2539	-0.1314	0.7098	0.8412	2678	0.0067	10176	10172	99.96
nat	A2012001	MOD13Q1	250m_16_days_NDVI	0.0729	0.2296	0.2549	0.2456	-0.0514	0.6973	0.7487	2594.28	0.0053	10176	10176	100
nat	A2012017	MOD13Q1	250m_16_days_NDVI	0.0741	0.1886	0.2584	0.2491	-0.1299	0.6669	0.7968	2629.04	0.0055	10176	10176	100
nat	A2012033	MOD13Q1	250m_16_days_NDVI	0.0941	0.3959	0.3466	0.3405	0.0319	0.7644	0.7325	3526.66	0.0089	10176	10175	99.99
nat	A2012049	MOD13Q1	250m_16_days_NDVI	0.1109	0.3717	0.3816	0.3893	-0.1788	0.8502	1.029	3882.58	0.0123	10176	10175	99.99
nat	A2012065	MOD13Q1	250m_16_days_NDVI	0.1306	0.194	0.4146	0.4303	-0.1815	0.8859	1.0674	4219.3	0.0171	10176	10176	100
nat	A2012081	MOD13Q1	250m_16_days_NDVI	0.1439	0.6077	0.5522	0.572	0.0025	0.8804	0.8779	5618.99	0.0207	10176	10176	100
nat	A2012097	MOD13Q1	250m_16_days_NDVI	0.1284	0.5801	0.5825	0.5993	-0.1423	0.8909	1.0332	5927.46	0.0165	10176	10176	100
nat	A2012113	MOD13Q1	250m_16_days_NDVI	0.1316	0.5908	0.54	0.5573	-0.0344	0.848	0.8824	5495.54	0.0173	10176	10176	100
nat	A2012129	MOD13Q1	250m_16_days_NDVI	0.1251	0.436	0.4223	0.4135	-0.0713	0.837	0.9083	4291.82	0.0157	10176	10164	99.88
nat	A2012145	MOD13Q1	250m_16_days_NDVI	0.0944	0.2674	0.3019	0.28	0.0779	0.829	0.7511	3068.84	0.0089	10176	10164	99.88
nat	A2012161	MOD13Q1	250m_16_days_NDVI	0.0883	0.2384	0.2672	0.2451	0.1051	0.8116	0.7065	2719.01	0.0078	10176	10176	100
nat	A2012177	MOD13Q1	250m_16_days_NDVI	0.089	0.216	0.2584	0.233	0.0879	0.8257	0.7378	2626.29	0.0079	10176	10165	99.89
nat	A2012193	MOD13Q1	250m_16_days_NDVI	0.0881	0.2177	0.252	0.2256	0.0993	0.8483	0.749	2564.42	0.0078	10176	10176	100
nat	A2012209	MOD13Q1	250m_16_days_NDVI	0.0896	0.2127	0.2499	0.2227	0.0882	0.8461	0.7579	2542.05	0.008	10176	10173	99.97
nat	A2012225	MOD13Q1	250m_16_days_NDVI	0.0857	0.2071	0.2486	0.224	0.1046	0.8641	0.7595	2530.09	0.0074	10176	10176	100
nat	A2012241	MOD13Q1	250m_16_days_NDVI	0.0829	0.2097	0.2464	0.223	0.0894	0.8083	0.7189	2504.4	0.0069	10176	10164	99.88
nat	A2012257	MOD13Q1	250m_16_days_NDVI	0.0833	0.2	0.2428	0.219	0.1205	0.8487	0.7282	2470	0.0069	10176	10172	99.96
nat	A2012273	MOD13Q1	250m_16_days_NDVI	0.0788	0.2252	0.2515	0.2305	0.0812	0.8242	0.743	2559	0.0062	10176	10174	99.98
nat	A2012289	MOD13Q1	250m_16_days_NDVI	0.0758	0.2121	0.2536	0.2302	0.0872	0.8767	0.7895	2581.05	0.0057	10176	10176	100
nat	A2012305	MOD13Q1	250m_16_days_NDVI	0.0856	0.2258	0.2771	0.2534	-0.0735	0.8181	0.8916	2819.47	0.0073	10176	10176	100
nat	A2012321	MOD13Q1	250m_16_days_NDVI	0.0916	0.3428	0.3674	0.3622	0.0271	0.858	0.8309	3735.39	0.0084	10176	10166	99.9
nat	A2012337	MOD13Q1	250m_16_days_NDVI	0.0989	0.5343	0.5229	0.5345	-0.0875	0.8865	0.974	5320.54	0.0098	10176	10176	100
nat	A2012353	MOD13Q1	250m_16_days_NDVI	0.0939	0.6314	0.5787	0.5916	-0.0527	0.8756	0.9283	5887.15	0.0088	10176	10173	99.97
nat	A2013001	MOD13Q1	250m_16_days_NDVI	0.0872	0.6001	0.6043	0.6169	-0.1595	0.8756	1.0351	6145.84	0.0076	10176	10170	99.94
nat	A2013017	MOD13Q1	250m_16_days_NDVI	0.0936	0.6835	0.6453	0.6606	0.1321	0.8753	0.7432	6560.47	0.0088	10176	10166	99.9
nat	A2013033	MOD13Q1	250m_16_days_NDVI	0.0965	0.695	0.6643	0.6808	-0.1019	0.8877	0.9896	6758.28	0.0093	10176	10174	99.98
nat	A2013049	MOD13Q1	250m_16_days_NDVI	0.0982	0.7051	0.6819	0.6977	0.0462	0.8989	0.8527	6939.27	0.0096	10176	10176	100
nat	A2013065	MOD13Q1	250m_16_days_NDVI	0.0945	0.7196	0.687	0.7064	0.1433	0.9044	0.7611	6991.29	0.0089	10176	10176	100
nat	A2013081	MOD13Q1	250m_16_days_NDVI	0.1118	0.6554	0.6197	0.6487	-0.1217	0.8603	0.982	6301.46	0.0125	10176	10168	99.92
nat	A2013097	MOD13Q1	250m_16_days_NDVI	0.1167	0.6447	0.5838	0.6054	0.1319	0.877	0.7451	5933.29	0.0136	10176	10164	99.88
nat	A2013113	MOD13Q1	250m_16_days_NDVI	0.0931	0.4312	0.409	0.4081	-0.1758	0.8548	1.0306	4160.92	0.0087	10176	10173	99.97
nat	A2013129	MOD13Q1	250m_16_days_NDVI	0.0806	0.3172	0.3205	0.3053	0.0395	0.8565	0.817	3261.05	0.0065	10176	10176	100
nat	A2013145	MOD13Q1	250m_16_days_NDVI	0.0822	0.25	0.2907	0.2704	-0.1371	0.8306	0.9677	2958.17	0.0068	10176	10176	100
nat	A2013161	MOD13Q1	250m_16_days_NDVI	0.0876	0.2492	0.2791	0.2557	0.0743	0.8252	0.7509	2837.72	0.0077	10176	10167	99.91
nat	A2013177	MOD13Q1	250m_16_days_NDVI	0.0917	0.2598	0.2819	0.256	0.0554	0.8874	0.832	2865.05	0.0084	10176	10164	99.88
nat	A2013193	MOD13Q1	250m_16_days_NDVI	0.0891	0.2327	0.2692	0.2436	0.0525	0.8694	0.8169	2739.66	0.0079	10176	10176	100
nat	A2013241	MOD13Q1	250m_16_days_NDVI	0.0847	0.2417	0.2653	0.2432	0.0735	0.8593	0.7858	2700.01	0.0072	10176	10176	100
nat	A2013257	MOD13Q1	250m_16_days_NDVI	0.0874	0.2369	0.266	0.2418	0.046	0.8696	0.8236	2703.46	0.0076	10176	10164	99.88
nat	A2013273	MOD13Q1	250m_16_days_NDVI	0.0768	0.2199	0.2469	0.2238	-0.1352	0.832	0.9672	2510.7	0.0059	10176	10170	99.94
nat	A2013289	MOD13Q1	250m_16_days_NDVI	0.0747	0.208	0.2344	0.2129	0.103	0.8504	0.7474	2382.35	0.0056	10176	10164	99.88
nat	A2013305	MOD13Q1	250m_16_days_NDVI	0.0651	0.1977	0.2275	0.2113	-0.1692	0.8173	0.9865	2312.11	0.0042	10176	10164	99.88
nat	A2013321	MOD13Q1	250m_16_days_NDVI	0.0634	0.2486	0.2704	0.2634	-0.0626	0.7403	0.8029	2557.42	0.004	10176	9458	92.94
nat	A2013337	MOD13Q1	250m_16_days_NDVI	0.0602	0.2818	0.3126	0.3056	-0.1792	0.8097	0.9889	3098.97	0.0036	10176	9913	97.42
nat	A2013353	MOD13Q1	250m_16_days_NDVI	0.055	0.2981	0.31	0.3058	0.0968	0.6403	0.5435	3087.19	0.003	10176	9960	97.88
nat	A2014001	MOD13Q1	250m_16_days_NDVI	0.0529	0.2602	0.2973	0.292	-0.0196	0.6033	0.6229	2999.46	0.0028	10176	10088	99.14
nat	A2014017	MOD13Q1	250m_16_days_NDVI	0.0526	0.2591	0.2792	0.2728	-0.0782	0.6067	0.6849	2756.37	0.0028	10176	9872	97.01
nat	A2014033	MOD13Q1	250m_16_days_NDVI	0.0807	0.3133	0.3456	0.3353	0.0901	0.8248	0.7347	3516.81	0.0065	10176	10175	99.99
urb	A2000049	MOD13Q1	250m_16_days_NDVI	0.1547	0.3366	0.4143	0.4153	-0.1949	0.9104	1.1053	2486.74	0.0239	6078	6002	98.75
urb	A2000065	MOD13Q1	250m_16_days_NDVI	0.1437	0.4449	0.4446	0.4391	-0.1968	0.8922	1.089	2690.89	0.0206	6078	6052	99.57
urb	A2000081	MOD13Q1	250m_16_days_NDVI	0.1486	0.4537	0.447	0.4383	-0.1842	0.91	1.0942	2709.42	0.0221	6078	6061	99.72
urb	A2000097	MOD13Q1	250m_16_days_NDVI	0.1452	0.4411	0.4342	0.4289	-0.1867	0.8982	1.0849	2638.84	0.0211	6078	6077	99.98
urb	A2000113	MOD13Q1	250m_16_days_NDVI	0.1345	0.369	0.4206	0.4185	-0.1975	0.8963	1.0938	2551.58	0.0181	6078	6067	99.82
urb	A2000129	MOD13Q1	250m_16_days_NDVI	0.1301	0.3295	0.4003	0.3978	-0.1918	0.9197	1.1115	2421.59	0.0169	6078	6050	99.54
urb	A2000145	MOD13Q1	250m_16_days_NDVI	0.1157	0.4551	0.3788	0.378	-0.1891	0.8619	1.051	2296.82	0.0134	6078	6064	99.77
urb	A2000161	MOD13Q1	250m_16_days_NDVI	0.1151	0.3342	0.3583	0.3533	-0.1971	0.8779	1.075	2167.82	0.0132	6078	6051	99.56
urb	A2000177	MOD13Q1	250m_16_days_NDVI	0.1177	0.3392	0.3491	0.3423	-0.1921	0.9112	1.1033	2113.31	0.0139	6078	6053	99.59
urb	A2000193	MOD13Q1	250m_16_days_NDVI	0.1226	0.3833	0.3532	0.3429	-0.1888	0.9006	1.0894	2141.31	0.015	6078	6063	99.75
urb	A2000209	MOD13Q1	250m_16_days_NDVI	0.12	0.3473	0.3367	0.328	-0.1839	0.8698	1.0537	2038.27	0.0144	6078	6054	99.61
urb	A2000225	MOD13Q1	250m_16_days_NDVI	0.1242	0.331	0.3444	0.3333	-0.1989	0.8826	1.0815	2056.99	0.0154	6078	5973	98.27
urb	A2000241	MOD13Q1	250m_16_days_NDVI	0.1245	0.3202	0.3517	0.3406	-0.1899	0.9162	1.1061	2132.23	0.0155	6078	6063	99.75
urb	A2000257	MOD13Q1	250m_16_days_NDVI	0.1204	0.3839	0.3499	0.3396	-0.1712	0.9137	1.0849	2122.64	0.0145	6078	6066	99.8
urb	A2000273	MOD13Q1	250m_16_days_NDVI	0.1204	0.3916	0.3425	0.3357	-0.1867	0.917	1.1037	2076.54	0.0145	6078	6063	99.75
urb	A2000289	MOD13Q1	250m_16_days_NDVI	0.1186	0.3833	0.3453	0.3435	-0.1997	0.8966	1.0963	2085.74	0.0141	6078	6040	99.37
urb	A2000305	MOD13Q1	250m_16_days_NDVI	0.1219	0.397	0.3789	0.382	-0.1723	0.8967	1.069	2299.52	0.0149	6078	6069	99.85
urb	A2000321	MOD13Q1	250m_16_days_NDVI	0.1182	0.436	0.3742	0.3788	-0.1985	0.8466	1.0451	2269.82	0.014	6078	6065	99.79
urb	A2000337	MOD13Q1	250m_16_days_NDVI	0.121	0.3975	0.3963	0.4012	-0.1768	0.8406	1.0174	2393.89	0.0146	6078	6041	99.39
urb	A2000353	MOD13Q1	250m_16_days_NDVI	0.1225	0.3306	0.395	0.3995	-0.1992	0.8325	1.0317	2397.52	0.015	6078	6070	99.87
urb	A2001001	MOD13Q1	250m_16_days_NDVI	0.1265	0.3904	0.4013	0.404	-0.1939	0.8608	1.0547	2431.45	0.016	6078	6059	99.69
urb	A2001017	MOD13Q1	250m_16_days_NDVI	0.1295	0.3182	0.4047	0.4077	-0.1957	0.838	1.0337	2455.26	0.0168	6078	6067	99.82
urb	A2001033	MOD13Q1	250m_16_days_NDVI	0.1294	0.3333	0.3895	0.3867	-0.1987	0.8304	1.0291	2361.34	0.0167	6078	6063	99.75
urb	A2001049	MOD13Q1	250m_16_days_NDVI	0.1474	0.3788	0.4094	0.4068	-0.1975	0.9677	1.1652	2478	0.0217	6078	6053	99.59
urb	A2001065	MOD13Q1	250m_16_days_NDVI	0.146	0.4843	0.4483	0.4412	-0.1878	0.9367	1.1245	2724.36	0.0213	6078	6077	99.98
urb	A2001081	MOD13Q1	250m_16_days_NDVI	0.1557	0.4375	0.5265	0.5165	-0.19	0.9219	1.1119	3196.99	0.0242	6078	6072	99.9
urb	A2001097	MOD13Q1	250m_16_days_NDVI	0.1433	0.4168	0.4203	0.4214	-0.1949	0.892	1.0869	2553.91	0.0205	6078	6077	99.98
urb	A2001113	MOD13Q1	250m_16_days_NDVI	0.1261	0.3707	0.401	0.3943	-0.1855	0.8685	1.054	2433.66	0.0159	6078	6069	99.85
urb	A2001129	MOD13Q1	250m_16_days_NDVI	0.1117	0.361	0.3603	0.357	-0.1566	0.8339	0.9905	2186.55	0.0125	6078	6068	99.84
urb	A2001145	MOD13Q1	250m_16_days_NDVI	0.111	0.3331	0.3446	0.339	-0.1982	0.8555	1.0537	2092.28	0.0123	6078	6072	99.9
urb	A2001161	MOD13Q1	250m_16_days_NDVI	0.1034	0.2932	0.3253	0.3232	-0.19	0.8244	1.0144	1972.79	0.0107	6078	6065	99.79
urb	A2001177	MOD13Q1	250m_16_days_NDVI	0.1126	0.3263	0.3291	0.3258	-0.1939	0.8574	1.0513	1998.34	0.0127	6078	6073	99.92
urb	A2001193	MOD13Q1	250m_16_days_NDVI	0.1198	0.3229	0.3404	0.3305	-0.1901	0.8866	1.0767	2068.82	0.0143	6078	6078	100
urb	A2001209	MOD13Q1	250m_16_days_NDVI	0.1243	0.3374	0.3385	0.3264	-0.193	0.8943	1.0873	2053.5	0.0154	6078	6067	99.82
urb	A2001225	MOD13Q1	250m_16_days_NDVI	0.1254	0.3417	0.3386	0.3269	-0.173	0.8987	1.0717	2051.78	0.0157	6078	6059	99.69
urb	A2001241	MOD13Q1	250m_16_days_NDVI	0.1221	0.3432	0.3328	0.3232	-0.1932	0.8962	1.0894	2012.38	0.0149	6078	6046	99.47
urb	A2001257	MOD13Q1	250m_16_days_NDVI	0.1184	0.3687	0.3411	0.3329	-0.1877	0.8562	1.0439	2072.71	0.014	6078	6076	99.97
urb	A2001273	MOD13Q1	250m_16_days_NDVI	0.1129	0.2858	0.3245	0.3202	-0.1958	0.8859	1.0817	1970.33	0.0128	6078	6072	99.9
urb	A2001289	MOD13Q1	250m_16_days_NDVI	0.1142	0.3545	0.3204	0.3172	-0.1945	0.8965	1.091	1939.73	0.013	6078	6055	99.62
urb	A2001305	MOD13Q1	250m_16_days_NDVI	0.1133	0.3258	0.3222	0.3229	-0.1992	0.8533	1.0525	1949.16	0.0128	6078	6050	99.54
urb	A2001321	MOD13Q1	250m_16_days_NDVI	0.1123	0.4092	0.3764	0.385	-0.1994	0.8292	1.0286	2283.13	0.0126	6078	6065	99.79
urb	A2001337	MOD13Q1	250m_16_days_NDVI	0.1229	0.3528	0.3904	0.4001	-0.1943	0.8513	1.0456	2370.31	0.0151	6078	6071	99.88
urb	A2001353	MOD13Q1	250m_16_days_NDVI	0.1162	0.44	0.4379	0.4433	-0.1823	0.7671	0.9494	2559.89	0.0135	6078	5846	96.18
urb	A2002001	MOD13Q1	250m_16_days_NDVI	0.1408	0.3303	0.4184	0.4201	-0.1978	0.8579	1.0557	2534.49	0.0198	6078	6057	99.65
urb	A2002017	MOD13Q1	250m_16_days_NDVI	0.1398	0.4491	0.4267	0.4264	-0.1909	0.86	1.0509	2589.42	0.0195	6078	6068	99.84
urb	A2002033	MOD13Q1	250m_16_days_NDVI	0.1392	0.3919	0.4135	0.4092	-0.2	0.9421	1.1421	2501.76	0.0194	6078	6050	99.54
urb	A2002049	MOD13Q1	250m_16_days_NDVI	0.1595	0.3779	0.4537	0.437	-0.1966	0.9618	1.1584	2752.73	0.0255	6078	6067	99.82
urb	A2002065	MOD13Q1	250m_16_days_NDVI	0.1645	0.3992	0.4689	0.455	-0.1939	0.9556	1.1495	2837.18	0.0271	6078	6051	99.56
urb	A2002081	MOD13Q1	250m_16_days_NDVI	0.1634	0.4202	0.4712	0.458	-0.1982	0.958	1.1562	2849.11	0.0267	6078	6046	99.47
urb	A2002097	MOD13Q1	250m_16_days_NDVI	0.1471	0.4206	0.4401	0.4336	-0.1956	0.8931	1.0887	2664.53	0.0217	6078	6054	99.61
urb	A2002113	MOD13Q1	250m_16_days_NDVI	0.1294	0.2973	0.4635	0.4559	-0.1851	0.8805	1.0656	2813.76	0.0167	6078	6071	99.88
urb	A2002129	MOD13Q1	250m_16_days_NDVI	0.1184	0.4944	0.3767	0.3703	-0.1901	0.8847	1.0748	2275.43	0.014	6078	6041	99.39
urb	A2002145	MOD13Q1	250m_16_days_NDVI	0.112	0.5034	0.355	0.3483	-0.199	0.861	1.06	2149.29	0.0126	6078	6054	99.61
urb	A2002161	MOD13Q1	250m_16_days_NDVI	0.1129	0.3257	0.3466	0.3402	-0.1966	0.8852	1.0818	2097.99	0.0127	6078	6053	99.59
urb	A2002177	MOD13Q1	250m_16_days_NDVI	0.1153	0.3199	0.3441	0.3365	-0.1929	0.9029	1.0958	2068.46	0.0133	6078	6012	98.91
urb	A2002193	MOD13Q1	250m_16_days_NDVI	0.1195	0.3795	0.3421	0.3318	-0.1815	0.8866	1.0681	2068.53	0.0143	6078	6047	99.49
urb	A2002209	MOD13Q1	250m_16_days_NDVI	0.1212	0.3427	0.3427	0.332	-0.188	0.8741	1.0621	2052.32	0.0147	6078	5989	98.54
urb	A2002225	MOD13Q1	250m_16_days_NDVI	0.125	0.3212	0.3376	0.3254	-0.1987	0.8925	1.0912	2047.97	0.0156	6078	6067	99.82
urb	A2002241	MOD13Q1	250m_16_days_NDVI	0.1175	0.3098	0.3565	0.3425	-0.1508	0.8814	1.0322	2164.59	0.0138	6078	6071	99.88
urb	A2002257	MOD13Q1	250m_16_days_NDVI	0.1171	0.307	0.3416	0.3333	-0.1958	0.8606	1.0564	2073.6	0.0137	6078	6071	99.88
urb	A2002273	MOD13Q1	250m_16_days_NDVI	0.1113	0.3048	0.3326	0.3268	-0.1975	0.8469	1.0444	2020.02	0.0124	6078	6073	99.92
urb	A2002289	MOD13Q1	250m_16_days_NDVI	0.1075	0.3248	0.3277	0.3221	-0.188	0.8026	0.9906	1980.54	0.0116	6078	6043	99.42
urb	A2002305	MOD13Q1	250m_16_days_NDVI	0.1113	0.2836	0.3213	0.3143	-0.1781	0.8395	1.0176	1939.54	0.0124	6078	6037	99.33
urb	A2002321	MOD13Q1	250m_16_days_NDVI	0.1113	0.3694	0.3629	0.3687	-0.1814	0.8402	1.0216	2185.29	0.0124	6078	6021	99.06
urb	A2002337	MOD13Q1	250m_16_days_NDVI	0.1203	0.3629	0.3598	0.3602	-0.1591	0.8247	0.9838	2171.28	0.0145	6078	6035	99.29
urb	A2002353	MOD13Q1	250m_16_days_NDVI	0.1408	0.3846	0.4041	0.4139	-0.1982	0.8274	1.0256	2445.88	0.0198	6078	6053	99.59
urb	A2003001	MOD13Q1	250m_16_days_NDVI	0.1393	0.3966	0.44	0.4418	-0.162	0.9644	1.1264	2665.47	0.0194	6078	6058	99.67
urb	A2003017	MOD13Q1	250m_16_days_NDVI	0.15	0.4405	0.447	0.4468	-0.1963	0.9234	1.1197	2603.15	0.0225	6078	5823	95.8
urb	A2003033	MOD13Q1	250m_16_days_NDVI	0.1457	0.4096	0.4633	0.4568	-0.1992	0.9351	1.1343	2800.66	0.0212	6078	6045	99.46
urb	A2003049	MOD13Q1	250m_16_days_NDVI	0.1524	0.4052	0.4665	0.4593	-0.1995	0.9334	1.1329	2830.73	0.0232	6078	6068	99.84
urb	A2003065	MOD13Q1	250m_16_days_NDVI	0.1542	0.4219	0.4785	0.4632	-0.1911	0.957	1.1481	2902.85	0.0238	6078	6067	99.82
urb	A2003081	MOD13Q1	250m_16_days_NDVI	0.155	0.4011	0.4754	0.4617	-0.1914	0.9631	1.1545	2870.75	0.024	6078	6038	99.34
urb	A2003097	MOD13Q1	250m_16_days_NDVI	0.1484	0.468	0.4623	0.457	-0.1934	0.9127	1.1061	2788.28	0.022	6078	6031	99.23
urb	A2003113	MOD13Q1	250m_16_days_NDVI	0.1486	0.4505	0.4418	0.4395	-0.1978	0.8851	1.0829	2678.24	0.0221	6078	6062	99.74
urb	A2003129	MOD13Q1	250m_16_days_NDVI	0.127	0.3731	0.4028	0.3955	-0.1946	0.8265	1.0211	2435.34	0.0161	6078	6046	99.47
urb	A2003145	MOD13Q1	250m_16_days_NDVI	0.1147	0.2808	0.3764	0.371	-0.1861	0.8617	1.0478	2260.81	0.0131	6078	6006	98.82
urb	A2003161	MOD13Q1	250m_16_days_NDVI	0.1065	0.3086	0.3522	0.3485	-0.1806	0.8087	0.9893	2140.11	0.0113	6078	6077	99.98
urb	A2003177	MOD13Q1	250m_16_days_NDVI	0.1171	0.3278	0.3552	0.3462	-0.1912	0.8996	1.0908	2157.66	0.0137	6078	6074	99.93
urb	A2003193	MOD13Q1	250m_16_days_NDVI	0.1168	0.3128	0.3472	0.3372	-0.1981	0.8988	1.0969	2108.09	0.0137	6078	6071	99.88
urb	A2003209	MOD13Q1	250m_16_days_NDVI	0.1232	0.2892	0.3524	0.3407	-0.2	0.8975	1.0975	2127.15	0.0152	6078	6036	99.31
urb	A2003225	MOD13Q1	250m_16_days_NDVI	0.1259	0.3546	0.3633	0.3512	-0.1754	0.9003	1.0757	2203.54	0.0159	6078	6065	99.79
urb	A2003241	MOD13Q1	250m_16_days_NDVI	0.1267	0.4614	0.3679	0.353	-0.1948	0.8971	1.0919	2233.26	0.0161	6078	6071	99.88
urb	A2003257	MOD13Q1	250m_16_days_NDVI	0.1165	0.3333	0.3521	0.3449	-0.1981	0.881	1.0791	2128.97	0.0136	6078	6047	99.49
urb	A2003273	MOD13Q1	250m_16_days_NDVI	0.1127	0.3624	0.3466	0.3406	-0.1654	0.8477	1.0131	2089.49	0.0127	6078	6029	99.19
urb	A2003289	MOD13Q1	250m_16_days_NDVI	0.1113	0.3333	0.3412	0.3379	-0.194	0.8154	1.0094	2052.05	0.0124	6078	6014	98.95
urb	A2003305	MOD13Q1	250m_16_days_NDVI	0.1176	0.3338	0.3481	0.3478	-0.1991	0.8574	1.0565	2106.05	0.0138	6078	6050	99.54
urb	A2003321	MOD13Q1	250m_16_days_NDVI	0.1129	0.3428	0.3497	0.353	-0.1985	0.8805	1.079	2109.55	0.0127	6078	6033	99.26
urb	A2003337	MOD13Q1	250m_16_days_NDVI	0.1186	0.3336	0.3751	0.38	-0.1989	0.8298	1.0287	2254.04	0.0141	6078	6009	98.86
urb	A2003353	MOD13Q1	250m_16_days_NDVI	0.1317	0.4294	0.3944	0.3971	-0.1968	0.8817	1.0785	2389.39	0.0173	6078	6058	99.67
urb	A2004001	MOD13Q1	250m_16_days_NDVI	0.1318	0.4743	0.3954	0.3977	-0.1997	0.8817	1.0814	2391.48	0.0174	6078	6048	99.51
urb	A2004017	MOD13Q1	250m_16_days_NDVI	0.1344	0.355	0.4159	0.4142	-0.194	0.892	1.086	2503.54	0.0181	6078	6020	99.05
urb	A2004033	MOD13Q1	250m_16_days_NDVI	0.1404	0.4152	0.4332	0.4276	-0.1907	0.93	1.1207	2631.18	0.0197	6078	6074	99.93
urb	A2004049	MOD13Q1	250m_16_days_NDVI	0.1476	0.4832	0.4528	0.4451	-0.1977	0.8998	1.0975	2705.65	0.0218	6078	5976	98.32
urb	A2004065	MOD13Q1	250m_16_days_NDVI	0.1519	0.4216	0.4852	0.4744	-0.1857	0.9258	1.1115	2947.11	0.0231	6078	6074	99.93
urb	A2004081	MOD13Q1	250m_16_days_NDVI	0.1491	0.4473	0.4623	0.4613	-0.1984	0.9068	1.1052	2800.18	0.0222	6078	6057	99.65
urb	A2004097	MOD13Q1	250m_16_days_NDVI	0.1361	0.3358	0.4324	0.4324	-0.1887	0.8553	1.044	2581.58	0.0185	6078	5970	98.22
urb	A2004113	MOD13Q1	250m_16_days_NDVI	0.1303	0.4019	0.4097	0.3992	-0.1991	0.8683	1.0674	2490.19	0.017	6078	6078	100
urb	A2004129	MOD13Q1	250m_16_days_NDVI	0.1148	0.3825	0.3692	0.3653	-0.1996	0.881	1.0806	2241.18	0.0132	6078	6071	99.88
urb	A2004145	MOD13Q1	250m_16_days_NDVI	0.1154	0.3819	0.3617	0.3548	-0.1927	0.8709	1.0636	2196.1	0.0133	6078	6072	99.9
urb	A2004161	MOD13Q1	250m_16_days_NDVI	0.1114	0.2871	0.3448	0.3371	-0.1947	0.8739	1.0686	2091.8	0.0124	6078	6066	99.8
urb	A2004177	MOD13Q1	250m_16_days_NDVI	0.1158	0.4929	0.3428	0.3318	-0.199	0.9067	1.1057	2072.13	0.0134	6078	6045	99.46
urb	A2004193	MOD13Q1	250m_16_days_NDVI	0.1212	0.311	0.3454	0.3343	-0.1825	0.8889	1.0714	2096.03	0.0147	6078	6069	99.85
urb	A2004209	MOD13Q1	250m_16_days_NDVI	0.1247	0.3292	0.3473	0.3337	-0.1936	0.9149	1.1085	2106.13	0.0155	6078	6064	99.77
urb	A2004225	MOD13Q1	250m_16_days_NDVI	0.1194	0.3335	0.3436	0.3329	-0.1841	0.8964	1.0805	2084.17	0.0143	6078	6066	99.8
urb	A2004241	MOD13Q1	250m_16_days_NDVI	0.1179	0.3199	0.3461	0.3347	-0.1969	0.8991	1.096	2097.22	0.0139	6078	6059	99.69
urb	A2004257	MOD13Q1	250m_16_days_NDVI	0.1141	0.3179	0.3439	0.3359	-0.1944	0.88	1.0744	2090.2	0.013	6078	6078	100
urb	A2004273	MOD13Q1	250m_16_days_NDVI	0.1126	0.2709	0.3372	0.3317	-0.1969	0.8798	1.0767	2042.55	0.0127	6078	6058	99.67
urb	A2004289	MOD13Q1	250m_16_days_NDVI	0.1182	0.3872	0.3363	0.3354	-0.1975	0.822	1.0195	2037.43	0.014	6078	6059	99.69
urb	A2004305	MOD13Q1	250m_16_days_NDVI	0.1172	0.3885	0.3955	0.4014	-0.1996	0.8676	1.0672	2402.94	0.0137	6078	6075	99.95
urb	A2004321	MOD13Q1	250m_16_days_NDVI	0.1302	0.3374	0.4408	0.444	-0.1995	0.8627	1.0622	2674.96	0.017	6078	6069	99.85
urb	A2004337	MOD13Q1	250m_16_days_NDVI	0.1246	0.4652	0.418	0.4213	-0.1936	0.8348	1.0284	2537.73	0.0155	6078	6071	99.88
urb	A2004353	MOD13Q1	250m_16_days_NDVI	0.1365	0.3313	0.4367	0.435	-0.1979	0.8339	1.0318	2644.91	0.0186	6078	6056	99.64
urb	A2005001	MOD13Q1	250m_16_days_NDVI	0.1622	0.4496	0.4505	0.4532	-0.196	0.9336	1.1296	2639.91	0.0263	6078	5860	96.41
urb	A2005017	MOD13Q1	250m_16_days_NDVI	0.1538	0.5135	0.4451	0.4398	-0.1926	0.916	1.1086	2691.89	0.0236	6078	6048	99.51
urb	A2005033	MOD13Q1	250m_16_days_NDVI	0.1596	0.5307	0.4442	0.4359	-0.1995	0.911	1.1105	2681.3	0.0255	6078	6036	99.31
urb	A2005049	MOD13Q1	250m_16_days_NDVI	0.1647	0.491	0.4885	0.475	-0.1975	0.9123	1.1098	2959.89	0.0271	6078	6059	99.69
urb	A2005065	MOD13Q1	250m_16_days_NDVI	0.1665	0.3586	0.4877	0.4699	-0.1989	0.9758	1.1747	2960.52	0.0277	6078	6071	99.88
urb	A2005081	MOD13Q1	250m_16_days_NDVI	0.1623	0.4789	0.4851	0.4698	-0.1944	0.9777	1.1721	2939.61	0.0263	6078	6060	99.7
urb	A2005097	MOD13Q1	250m_16_days_NDVI	0.1458	0.4274	0.4818	0.4692	-0.1955	0.9146	1.1101	2919.82	0.0213	6078	6060	99.7
urb	A2005113	MOD13Q1	250m_16_days_NDVI	0.146	0.3871	0.4341	0.4268	-0.1997	0.9042	1.1039	2635.2	0.0213	6078	6071	99.88
urb	A2005129	MOD13Q1	250m_16_days_NDVI	0.1348	0.3828	0.4085	0.3982	-0.1936	0.9135	1.1071	2471.28	0.0182	6078	6050	99.54
urb	A2005145	MOD13Q1	250m_16_days_NDVI	0.1232	0.4142	0.3816	0.3767	-0.1936	0.9175	1.1111	2309.77	0.0152	6078	6053	99.59
urb	A2005161	MOD13Q1	250m_16_days_NDVI	0.1187	0.3362	0.3641	0.3585	-0.195	0.8619	1.0569	2212.77	0.0141	6078	6077	99.98
urb	A2005177	MOD13Q1	250m_16_days_NDVI	0.1216	0.2811	0.3574	0.3479	-0.1751	0.9108	1.0859	2167.45	0.0148	6078	6065	99.79
urb	A2005193	MOD13Q1	250m_16_days_NDVI	0.1208	0.3471	0.3566	0.3451	-0.1929	0.8675	1.0604	2161.26	0.0146	6078	6061	99.72
urb	A2005209	MOD13Q1	250m_16_days_NDVI	0.1239	0.3412	0.3542	0.3417	-0.1918	0.8876	1.0794	2150.09	0.0154	6078	6071	99.88
urb	A2005225	MOD13Q1	250m_16_days_NDVI	0.1282	0.3591	0.3544	0.3408	-0.1906	0.9064	1.097	2151.95	0.0164	6078	6072	99.9
urb	A2005241	MOD13Q1	250m_16_days_NDVI	0.1239	0.3449	0.356	0.3454	-0.1872	0.8929	1.0801	2151.81	0.0153	6078	6045	99.46
urb	A2005257	MOD13Q1	250m_16_days_NDVI	0.122	0.31	0.3509	0.3404	-0.1947	0.8935	1.0882	2123.95	0.0149	6078	6053	99.59
urb	A2005273	MOD13Q1	250m_16_days_NDVI	0.1182	0.3266	0.3518	0.3436	-0.1843	0.8935	1.0778	2132.44	0.014	6078	6062	99.74
urb	A2005289	MOD13Q1	250m_16_days_NDVI	0.1136	0.4034	0.3473	0.3438	-0.2	0.8545	1.0545	2107.6	0.0129	6078	6069	99.85
urb	A2005305	MOD13Q1	250m_16_days_NDVI	0.1162	0.3254	0.3337	0.3291	-0.1921	0.8844	1.0765	2015.66	0.0135	6078	6041	99.39
urb	A2005321	MOD13Q1	250m_16_days_NDVI	0.1145	0.2432	0.3366	0.3348	-0.1886	0.8714	1.06	2042.99	0.0131	6078	6070	99.87
urb	A2005337	MOD13Q1	250m_16_days_NDVI	0.114	0.275	0.3313	0.3299	-0.1911	0.8559	1.047	2000.08	0.013	6078	6037	99.33
urb	A2005353	MOD13Q1	250m_16_days_NDVI	0.1312	0.2834	0.3212	0.3144	-0.1991	0.7132	0.9123	1180.89	0.0172	6078	3676	60.48
urb	A2006001	MOD13Q1	250m_16_days_NDVI	0.1295	0.3568	0.3686	0.3725	-0.1875	0.8601	1.0476	2228.31	0.0168	6078	6045	99.46
urb	A2006017	MOD13Q1	250m_16_days_NDVI	0.1222	0.3964	0.3757	0.3745	-0.1943	0.8128	1.0071	2280.34	0.0149	6078	6070	99.87
urb	A2006033	MOD13Q1	250m_16_days_NDVI	0.1419	0.3333	0.4278	0.4183	-0.1973	0.895	1.0923	2591.26	0.0201	6078	6057	99.65
urb	A2006049	MOD13Q1	250m_16_days_NDVI	0.1411	0.4086	0.4201	0.4093	-0.1876	0.889	1.0766	2543.69	0.0199	6078	6055	99.62
urb	A2006065	MOD13Q1	250m_16_days_NDVI	0.1552	0.4425	0.4366	0.4309	-0.1956	0.9717	1.1673	2643.15	0.0241	6078	6054	99.61
urb	A2006081	MOD13Q1	250m_16_days_NDVI	0.1662	0.5019	0.429	0.4177	-0.1328	0.9809	1.1137	2130.33	0.0276	6078	4966	81.7
urb	A2006097	MOD13Q1	250m_16_days_NDVI	0.1572	0.4322	0.4616	0.4523	-0.1959	0.9758	1.1717	2803.65	0.0247	6078	6074	99.93
urb	A2006113	MOD13Q1	250m_16_days_NDVI	0.1452	0.4783	0.4538	0.4454	-0.1997	0.9384	1.1381	2748.75	0.0211	6078	6057	99.65
urb	A2006129	MOD13Q1	250m_16_days_NDVI	0.1283	0.4702	0.4078	0.4036	-0.1972	0.8898	1.087	2473.19	0.0165	6078	6065	99.79
urb	A2006145	MOD13Q1	250m_16_days_NDVI	0.1206	0.5208	0.3906	0.3861	-0.1684	0.8875	1.0559	2363.64	0.0145	6078	6052	99.57
urb	A2006161	MOD13Q1	250m_16_days_NDVI	0.1161	0.4059	0.3623	0.3616	-0.1828	0.876	1.0588	2191.64	0.0135	6078	6050	99.54
urb	A2006177	MOD13Q1	250m_16_days_NDVI	0.1153	0.376	0.3619	0.3579	-0.1955	0.8922	1.0877	2197.59	0.0133	6078	6073	99.92
urb	A2006193	MOD13Q1	250m_16_days_NDVI	0.1182	0.4887	0.3603	0.3515	-0.1946	0.8919	1.0865	2184.48	0.014	6078	6063	99.75
urb	A2006209	MOD13Q1	250m_16_days_NDVI	0.1224	0.3324	0.3548	0.3435	-0.1895	0.9017	1.0912	2153.03	0.015	6078	6069	99.85
urb	A2006225	MOD13Q1	250m_16_days_NDVI	0.1287	0.33	0.3573	0.3462	-0.1849	0.8904	1.0753	2163.59	0.0166	6078	6056	99.64
urb	A2006241	MOD13Q1	250m_16_days_NDVI	0.1239	0.3227	0.3579	0.3439	-0.198	0.8779	1.0759	2173.33	0.0153	6078	6072	99.9
urb	A2006257	MOD13Q1	250m_16_days_NDVI	0.1186	0.3239	0.3515	0.34	-0.2	0.8646	1.0646	2124.39	0.0141	6078	6044	99.44
urb	A2006273	MOD13Q1	250m_16_days_NDVI	0.1146	0.3505	0.3466	0.3408	-0.1865	0.8663	1.0528	2103.01	0.0131	6078	6067	99.82
urb	A2006289	MOD13Q1	250m_16_days_NDVI	0.112	0.3285	0.3459	0.34	-0.1908	0.8645	1.0553	2096.11	0.0125	6078	6060	99.7
urb	A2006305	MOD13Q1	250m_16_days_NDVI	0.1125	0.3698	0.3332	0.335	-0.1864	0.8696	1.056	2022.23	0.0127	6078	6070	99.87
urb	A2006321	MOD13Q1	250m_16_days_NDVI	0.1143	0.3818	0.3694	0.3716	-0.1835	0.8313	1.0148	2242.08	0.0131	6078	6069	99.85
urb	A2006337	MOD13Q1	250m_16_days_NDVI	0.1133	0.3605	0.3569	0.3599	-0.1975	0.8055	1.003	2158.54	0.0128	6078	6048	99.51
urb	A2006353	MOD13Q1	250m_16_days_NDVI	0.1171	0.4615	0.3683	0.3746	-0.197	0.8021	0.9991	2234.35	0.0137	6078	6067	99.82
urb	A2007001	MOD13Q1	250m_16_days_NDVI	0.112	0.3268	0.3555	0.3574	-0.1987	0.8257	1.0244	2118.08	0.0125	6078	5958	98.03
urb	A2007017	MOD13Q1	250m_16_days_NDVI	0.1106	0.3209	0.3422	0.345	-0.1915	0.7944	0.9859	2079.19	0.0122	6078	6076	99.97
urb	A2007033	MOD13Q1	250m_16_days_NDVI	0.1251	0.3749	0.3807	0.3755	-0.1963	0.8561	1.0524	2250.58	0.0156	6078	5912	97.27
urb	A2007049	MOD13Q1	250m_16_days_NDVI	0.1377	0.3591	0.4144	0.4038	-0.1992	0.8821	1.0813	2448.3	0.0189	6078	5908	97.2
urb	A2007065	MOD13Q1	250m_16_days_NDVI	0.1403	0.4678	0.4285	0.4151	-0.1966	0.9052	1.1018	2578.95	0.0197	6078	6018	99.01
urb	A2007081	MOD13Q1	250m_16_days_NDVI	0.1409	0.3977	0.4222	0.4122	-0.1982	0.9066	1.1048	2498.79	0.0199	6078	5919	97.38
urb	A2007097	MOD13Q1	250m_16_days_NDVI	0.1242	0.4032	0.4035	0.3981	-0.196	0.8906	1.0866	2419.18	0.0154	6078	5995	98.63
urb	A2007113	MOD13Q1	250m_16_days_NDVI	0.1246	0.3672	0.3885	0.3822	-0.1984	0.8972	1.0956	2330.22	0.0155	6078	5998	98.68
urb	A2007129	MOD13Q1	250m_16_days_NDVI	0.1141	0.366	0.3619	0.36	-0.1729	0.8698	1.0427	2167.77	0.013	6078	5990	98.55
urb	A2007145	MOD13Q1	250m_16_days_NDVI	0.1157	0.276	0.3472	0.3413	-0.1941	0.8959	1.09	2092.93	0.0134	6078	6028	99.18
urb	A2007161	MOD13Q1	250m_16_days_NDVI	0.1151	0.2318	0.3465	0.3391	-0.1971	0.8759	1.073	2083.68	0.0132	6078	6013	98.93
urb	A2007177	MOD13Q1	250m_16_days_NDVI	0.114	0.3798	0.3403	0.3331	-0.1977	0.888	1.0857	1999.6	0.013	6078	5876	96.68
urb	A2007193	MOD13Q1	250m_16_days_NDVI	0.124	0.3791	0.3518	0.3405	-0.1779	0.9031	1.081	2100.45	0.0154	6078	5971	98.24
urb	A2007209	MOD13Q1	250m_16_days_NDVI	0.1227	0.3493	0.3485	0.3387	-0.1918	0.8707	1.0625	2102.44	0.0151	6078	6033	99.26
urb	A2007225	MOD13Q1	250m_16_days_NDVI	0.1251	0.3571	0.3503	0.3378	-0.1961	0.8613	1.0574	2106.13	0.0157	6078	6013	98.93
urb	A2007241	MOD13Q1	250m_16_days_NDVI	0.1206	0.3711	0.3389	0.3298	-0.1987	0.8909	1.0896	2057.2	0.0145	6078	6070	99.87
urb	A2007257	MOD13Q1	250m_16_days_NDVI	0.1185	0.3069	0.3397	0.3313	-0.1872	0.8859	1.0731	2052.4	0.014	6078	6041	99.39
urb	A2007273	MOD13Q1	250m_16_days_NDVI	0.1231	0.3747	0.3539	0.3489	-0.2	0.8876	1.0876	2142.86	0.0152	6078	6055	99.62
urb	A2007289	MOD13Q1	250m_16_days_NDVI	0.1203	0.345	0.3538	0.3495	-0.1984	0.8821	1.0805	2144.79	0.0145	6078	6062	99.74
urb	A2007305	MOD13Q1	250m_16_days_NDVI	0.1189	0.3289	0.3675	0.3704	-0.1971	0.831	1.0281	2207.73	0.0141	6078	6008	98.85
urb	A2007321	MOD13Q1	250m_16_days_NDVI	0.1153	0.4074	0.3728	0.374	-0.1922	0.8423	1.0345	2261.77	0.0133	6078	6067	99.82
urb	A2007337	MOD13Q1	250m_16_days_NDVI	0.1173	0.463	0.3597	0.3606	-0.1899	0.8572	1.0471	2178.04	0.0137	6078	6055	99.62
urb	A2007353	MOD13Q1	250m_16_days_NDVI	0.1212	0.3575	0.3671	0.3646	-0.1883	0.8683	1.0566	2188.37	0.0147	6078	5961	98.08
urb	A2008001	MOD13Q1	250m_16_days_NDVI	0.1248	0.3783	0.3483	0.3485	-0.195	0.7792	0.9742	2098.94	0.0156	6078	6027	99.16
urb	A2008017	MOD13Q1	250m_16_days_NDVI	0.1377	0.3078	0.3856	0.3831	-0.1855	0.8278	1.0133	2332.82	0.019	6078	6050	99.54
urb	A2008033	MOD13Q1	250m_16_days_NDVI	0.1392	0.3048	0.3936	0.3858	-0.1953	0.8289	1.0242	2387.95	0.0194	6078	6067	99.82
urb	A2008049	MOD13Q1	250m_16_days_NDVI	0.1506	0.3795	0.4187	0.4078	-0.1971	0.9011	1.0982	2532.75	0.0227	6078	6049	99.52
urb	A2008065	MOD13Q1	250m_16_days_NDVI	0.1564	0.4227	0.4439	0.4229	-0.175	0.9197	1.0947	2692.27	0.0245	6078	6065	99.79
urb	A2008081	MOD13Q1	250m_16_days_NDVI	0.1498	0.4471	0.445	0.4271	-0.1935	0.9082	1.1017	2703.53	0.0225	6078	6076	99.97
urb	A2008097	MOD13Q1	250m_16_days_NDVI	0.1361	0.3679	0.4165	0.4063	-0.1967	0.8618	1.0585	2524.09	0.0185	6078	6060	99.7
urb	A2008113	MOD13Q1	250m_16_days_NDVI	0.123	0.391	0.3897	0.3854	-0.1833	0.8563	1.0396	2362.74	0.0151	6078	6063	99.75
urb	A2008129	MOD13Q1	250m_16_days_NDVI	0.1099	0.3774	0.3514	0.3506	-0.1903	0.8772	1.0675	2131.98	0.0121	6078	6067	99.82
urb	A2008145	MOD13Q1	250m_16_days_NDVI	0.1107	0.3319	0.3474	0.3438	-0.19	0.8586	1.0486	2105.9	0.0123	6078	6062	99.74
urb	A2008161	MOD13Q1	250m_16_days_NDVI	0.1141	0.4082	0.347	0.3391	-0.1849	0.8655	1.0504	2102.66	0.013	6078	6059	99.69
urb	A2008177	MOD13Q1	250m_16_days_NDVI	0.1149	0.3229	0.3328	0.3266	-0.1986	0.8728	1.0714	2016.69	0.0132	6078	6060	99.7
urb	A2008193	MOD13Q1	250m_16_days_NDVI	0.1158	0.3037	0.3317	0.3217	-0.1946	0.8791	1.0737	2005.81	0.0134	6078	6047	99.49
urb	A2008209	MOD13Q1	250m_16_days_NDVI	0.1233	0.3536	0.3444	0.3316	-0.1727	0.8721	1.0448	2087.23	0.0152	6078	6060	99.7
urb	A2008225	MOD13Q1	250m_16_days_NDVI	0.1215	0.3447	0.3371	0.3269	-0.2	0.8961	1.0961	2040.74	0.0148	6078	6053	99.59
urb	A2008241	MOD13Q1	250m_16_days_NDVI	0.1185	0.3314	0.3333	0.3233	-0.1979	0.8485	1.0464	2021.2	0.014	6078	6065	99.79
urb	A2008257	MOD13Q1	250m_16_days_NDVI	0.1155	0.3462	0.3345	0.325	-0.1832	0.8741	1.0573	2030.59	0.0133	6078	6071	99.88
urb	A2008273	MOD13Q1	250m_16_days_NDVI	0.1157	0.3186	0.3395	0.3315	-0.1849	0.8933	1.0782	2063.71	0.0134	6078	6078	100
urb	A2008289	MOD13Q1	250m_16_days_NDVI	0.1075	0.3333	0.333	0.327	-0.1919	0.8374	1.0293	2018.15	0.0116	6078	6060	99.7
urb	A2008305	MOD13Q1	250m_16_days_NDVI	0.1203	0.3336	0.3544	0.3532	-0.1971	0.8826	1.0797	2142.36	0.0145	6078	6045	99.46
urb	A2008321	MOD13Q1	250m_16_days_NDVI	0.1187	0.3169	0.3501	0.3525	-0.181	0.858	1.039	2119.49	0.0141	6078	6054	99.61
urb	A2008337	MOD13Q1	250m_16_days_NDVI	0.1167	0.2994	0.3546	0.3558	-0.1929	0.8561	1.049	2149.78	0.0136	6078	6063	99.75
urb	A2008353	MOD13Q1	250m_16_days_NDVI	0.1134	0.3476	0.3357	0.3351	-0.1851	0.7467	0.9318	2028.88	0.0129	6078	6043	99.42
urb	A2009001	MOD13Q1	250m_16_days_NDVI	0.1173	0.2935	0.3523	0.3527	-0.1816	0.779	0.9606	2117.05	0.0138	6078	6010	98.88
urb	A2009017	MOD13Q1	250m_16_days_NDVI	0.1209	0.2739	0.3699	0.3662	-0.1972	0.764	0.9612	2241.06	0.0146	6078	6058	99.67
urb	A2009033	MOD13Q1	250m_16_days_NDVI	0.1291	0.2802	0.3622	0.3608	-0.1832	0.8653	1.0485	2193.13	0.0167	6078	6055	99.62
urb	A2009049	MOD13Q1	250m_16_days_NDVI	0.1449	0.3524	0.3898	0.3815	-0.1874	0.9143	1.1017	2321.38	0.021	6078	5956	97.99
urb	A2009065	MOD13Q1	250m_16_days_NDVI	0.1493	0.3881	0.4256	0.4156	-0.1985	0.9036	1.1021	2580.98	0.0223	6078	6065	99.79
urb	A2009081	MOD13Q1	250m_16_days_NDVI	0.1438	0.3619	0.4366	0.4221	-0.1994	0.9098	1.1092	2634.9	0.0207	6078	6035	99.29
urb	A2009097	MOD13Q1	250m_16_days_NDVI	0.1428	0.3745	0.4191	0.4076	-0.1884	0.8913	1.0797	2541.47	0.0204	6078	6064	99.77
urb	A2009113	MOD13Q1	250m_16_days_NDVI	0.1285	0.2194	0.3849	0.3785	-0.1976	0.8594	1.057	2324.64	0.0165	6078	6040	99.37
urb	A2009129	MOD13Q1	250m_16_days_NDVI	0.113	0.2095	0.3603	0.3556	-0.1936	0.8797	1.0733	2182.19	0.0128	6078	6057	99.65
urb	A2009145	MOD13Q1	250m_16_days_NDVI	0.1126	0.3019	0.341	0.3367	-0.1952	0.889	1.0842	2059.96	0.0127	6078	6041	99.39
urb	A2009161	MOD13Q1	250m_16_days_NDVI	0.1112	0.3263	0.3323	0.3269	-0.1654	0.8723	1.0377	2014.6	0.0124	6078	6062	99.74
urb	A2009177	MOD13Q1	250m_16_days_NDVI	0.1157	0.2888	0.3353	0.3285	-0.1841	0.8589	1.043	2026.54	0.0134	6078	6044	99.44
urb	A2009193	MOD13Q1	250m_16_days_NDVI	0.1197	0.3829	0.3366	0.3276	-0.1691	0.9028	1.0719	2039.37	0.0143	6078	6058	99.67
urb	A2009209	MOD13Q1	250m_16_days_NDVI	0.1188	0.3679	0.3339	0.3234	-0.1901	0.8549	1.045	2014.68	0.0141	6078	6033	99.26
urb	A2009225	MOD13Q1	250m_16_days_NDVI	0.1186	0.2811	0.3338	0.3237	-0.1944	0.8596	1.054	2023.54	0.0141	6078	6063	99.75
urb	A2009241	MOD13Q1	250m_16_days_NDVI	0.1182	0.3333	0.3359	0.3257	-0.1945	0.8734	1.0679	2032.4	0.014	6078	6050	99.54
urb	A2009257	MOD13Q1	250m_16_days_NDVI	0.1206	0.3329	0.3445	0.3361	-0.1923	0.8894	1.0817	2090.52	0.0145	6078	6069	99.85
urb	A2009273	MOD13Q1	250m_16_days_NDVI	0.1136	0.3053	0.3157	0.3125	-0.1969	0.8417	1.0386	1914.42	0.0129	6078	6065	99.79
urb	A2009289	MOD13Q1	250m_16_days_NDVI	0.1212	0.4397	0.3886	0.3933	-0.1972	0.868	1.0652	2357.56	0.0147	6078	6067	99.82
urb	A2009305	MOD13Q1	250m_16_days_NDVI	0.1277	0.3671	0.4075	0.4154	-0.2	0.8579	1.0579	2471.74	0.0163	6078	6066	99.8
urb	A2009321	MOD13Q1	250m_16_days_NDVI	0.1243	0.4427	0.4138	0.4218	-0.1842	0.8278	1.012	2511.47	0.0155	6078	6069	99.85
urb	A2009337	MOD13Q1	250m_16_days_NDVI	0.128	0.4192	0.3763	0.3896	-0.1937	0.7878	0.9815	2264.54	0.0164	6078	6018	99.01
urb	A2009353	MOD13Q1	250m_16_days_NDVI	0.1379	0.3676	0.3937	0.3967	-0.1749	0.8281	1.003	2378.11	0.019	6078	6040	99.37
urb	A2010001	MOD13Q1	250m_16_days_NDVI	0.1315	0.4694	0.4072	0.405	-0.1975	0.8608	1.0583	2453.96	0.0173	6078	6027	99.16
urb	A2010017	MOD13Q1	250m_16_days_NDVI	0.1443	0.515	0.4464	0.4457	-0.1978	0.8919	1.0897	2678.88	0.0208	6078	6001	98.73
urb	A2010033	MOD13Q1	250m_16_days_NDVI	0.1529	0.4569	0.454	0.4519	-0.186	0.8801	1.0661	2756.02	0.0234	6078	6071	99.88
urb	A2010049	MOD13Q1	250m_16_days_NDVI	0.1546	0.4349	0.4428	0.4362	-0.2	0.9002	1.1002	2621.56	0.0239	6078	5920	97.4
urb	A2010065	MOD13Q1	250m_16_days_NDVI	0.1589	0.5031	0.4755	0.4575	-0.1964	0.9332	1.1296	2880.95	0.0252	6078	6059	99.69
urb	A2010081	MOD13Q1	250m_16_days_NDVI	0.1512	0.4105	0.4568	0.4428	-0.1984	0.9038	1.1022	2769.55	0.0229	6078	6063	99.75
urb	A2010097	MOD13Q1	250m_16_days_NDVI	0.1539	0.4093	0.4538	0.4404	-0.1914	0.8833	1.0747	2753.67	0.0237	6078	6068	99.84
urb	A2010113	MOD13Q1	250m_16_days_NDVI	0.145	0.4774	0.4442	0.4346	-0.1903	0.8797	1.07	2696.17	0.021	6078	6070	99.87
urb	A2010129	MOD13Q1	250m_16_days_NDVI	0.1308	0.3424	0.4034	0.3971	-0.198	0.8556	1.0536	2438.3	0.0171	6078	6045	99.46
urb	A2010145	MOD13Q1	250m_16_days_NDVI	0.1216	0.3576	0.3785	0.3714	-0.197	0.8456	1.0426	2283.63	0.0148	6078	6034	99.28
urb	A2010161	MOD13Q1	250m_16_days_NDVI	0.1165	0.3107	0.3617	0.3581	-0.1953	0.8154	1.0107	2194.01	0.0136	6078	6066	99.8
urb	A2010177	MOD13Q1	250m_16_days_NDVI	0.1491	0.4396	0.4504	0.4167	-0.1944	0.8872	1.0816	2736.42	0.0222	6078	6075	99.95
urb	A2010193	MOD13Q1	250m_16_days_NDVI	0.122	0.3758	0.3483	0.3373	-0.1983	0.8578	1.0561	2108.57	0.0149	6078	6054	99.61
urb	A2010209	MOD13Q1	250m_16_days_NDVI	0.1249	0.3481	0.3517	0.3417	-0.1958	0.8718	1.0676	2131.25	0.0156	6078	6060	99.7
urb	A2010225	MOD13Q1	250m_16_days_NDVI	0.1271	0.3723	0.3537	0.3423	-0.1932	0.8977	1.0909	2147.7	0.0162	6078	6072	99.9
urb	A2010241	MOD13Q1	250m_16_days_NDVI	0.1217	0.3359	0.349	0.3384	-0.1931	0.8491	1.0422	2121.21	0.0148	6078	6078	100
urb	A2010257	MOD13Q1	250m_16_days_NDVI	0.1216	0.319	0.3473	0.3375	-0.1919	0.8747	1.0666	2104.18	0.0148	6078	6059	99.69
urb	A2010273	MOD13Q1	250m_16_days_NDVI	0.1152	0.3366	0.3381	0.3313	-0.1805	0.8457	1.0262	2053.68	0.0133	6078	6075	99.95
urb	A2010289	MOD13Q1	250m_16_days_NDVI	0.121	0.3382	0.3296	0.3262	-0.1932	0.8784	1.0716	2000.35	0.0146	6078	6069	99.85
urb	A2010305	MOD13Q1	250m_16_days_NDVI	0.1251	0.4234	0.3739	0.374	-0.1751	0.9145	1.0896	2264.05	0.0157	6078	6056	99.64
urb	A2010321	MOD13Q1	250m_16_days_NDVI	0.123	0.3637	0.3673	0.3706	-0.1829	0.8861	1.069	2227.61	0.0151	6078	6064	99.77
urb	A2010337	MOD13Q1	250m_16_days_NDVI	0.1158	0.4257	0.3729	0.382	-0.1836	0.8123	0.9959	2261.63	0.0134	6078	6065	99.79
urb	A2010353	MOD13Q1	250m_16_days_NDVI	0.1281	0.5147	0.3796	0.3859	-0.1775	0.8206	0.9981	2302.88	0.0164	6078	6066	99.8
urb	A2011001	MOD13Q1	250m_16_days_NDVI	0.1302	0.3336	0.3856	0.3949	-0.1975	0.8222	1.0197	2284.05	0.017	6078	5923	97.45
urb	A2011017	MOD13Q1	250m_16_days_NDVI	0.14	0.4021	0.4052	0.4081	-0.1956	0.8975	1.0931	2452.93	0.0196	6078	6054	99.61
urb	A2011033	MOD13Q1	250m_16_days_NDVI	0.1377	0.4535	0.4276	0.4233	-0.1875	0.9031	1.0906	2583.08	0.019	6078	6041	99.39
urb	A2011049	MOD13Q1	250m_16_days_NDVI	0.1418	0.3474	0.4123	0.4067	-0.163	0.9246	1.0876	2501.84	0.0201	6078	6068	99.84
urb	A2011065	MOD13Q1	250m_16_days_NDVI	0.1572	0.4638	0.4127	0.405	-0.1944	0.9271	1.1215	2490.97	0.0247	6078	6036	99.31
urb	A2011081	MOD13Q1	250m_16_days_NDVI	0.1533	0.4377	0.4411	0.4327	-0.1988	0.9211	1.1199	2669.75	0.0235	6078	6053	99.59
urb	A2011097	MOD13Q1	250m_16_days_NDVI	0.1522	0.4658	0.4463	0.4379	-0.1805	0.8992	1.0797	2691.26	0.0231	6078	6030	99.21
urb	A2011113	MOD13Q1	250m_16_days_NDVI	0.1388	0.3519	0.4323	0.4241	-0.1944	0.8738	1.0682	2608.21	0.0193	6078	6033	99.26
urb	A2011129	MOD13Q1	250m_16_days_NDVI	0.1253	0.4145	0.394	0.3906	-0.1677	0.8627	1.0304	2392.57	0.0157	6078	6073	99.92
urb	A2011145	MOD13Q1	250m_16_days_NDVI	0.1205	0.3876	0.36	0.3599	-0.198	0.8507	1.0487	2183.2	0.0145	6078	6064	99.77
urb	A2011161	MOD13Q1	250m_16_days_NDVI	0.1213	0.436	0.3642	0.3587	-0.2	0.8948	1.0948	2201.97	0.0147	6078	6046	99.47
urb	A2011177	MOD13Q1	250m_16_days_NDVI	0.1256	0.3707	0.3708	0.3629	-0.1984	0.8814	1.0798	2249.25	0.0158	6078	6066	99.8
urb	A2011193	MOD13Q1	250m_16_days_NDVI	0.1282	0.3326	0.3693	0.3623	-0.1958	0.8538	1.0496	2239.72	0.0164	6078	6064	99.77
urb	A2011209	MOD13Q1	250m_16_days_NDVI	0.1296	0.3902	0.3652	0.3559	-0.1888	0.8904	1.0792	2217.97	0.0168	6078	6073	99.92
urb	A2011225	MOD13Q1	250m_16_days_NDVI	0.1316	0.3731	0.3649	0.3556	-0.1759	0.9112	1.0871	2213.16	0.0173	6078	6065	99.79
urb	A2011241	MOD13Q1	250m_16_days_NDVI	0.1274	0.3653	0.363	0.354	-0.1922	0.8569	1.0491	2205.41	0.0162	6078	6075	99.95
urb	A2011257	MOD13Q1	250m_16_days_NDVI	0.1241	0.3413	0.3575	0.3483	-0.1964	0.8348	1.0312	2162.29	0.0154	6078	6049	99.52
urb	A2011273	MOD13Q1	250m_16_days_NDVI	0.1288	0.4088	0.3679	0.3634	-0.1965	0.9081	1.1046	2227.37	0.0166	6078	6054	99.61
urb	A2011289	MOD13Q1	250m_16_days_NDVI	0.1233	0.3639	0.3702	0.3696	-0.185	0.9135	1.0985	2238.46	0.0152	6078	6047	99.49
urb	A2011305	MOD13Q1	250m_16_days_NDVI	0.1134	0.369	0.3578	0.3623	-0.1863	0.8521	1.0384	2171.85	0.0129	6078	6070	99.87
urb	A2011321	MOD13Q1	250m_16_days_NDVI	0.1146	0.3896	0.342	0.3553	-0.1948	0.7902	0.985	2071.76	0.0131	6078	6057	99.65
urb	A2011337	MOD13Q1	250m_16_days_NDVI	0.1059	0.3282	0.3288	0.3358	-0.196	0.7456	0.9416	1988.03	0.0112	6078	6047	99.49
urb	A2011353	MOD13Q1	250m_16_days_NDVI	0.1074	0.3562	0.327	0.3325	-0.1978	0.7429	0.9407	1981.66	0.0115	6078	6060	99.7
urb	A2012001	MOD13Q1	250m_16_days_NDVI	0.0993	0.3046	0.3112	0.3133	-0.1912	0.7156	0.9068	1890.08	0.0099	6078	6073	99.92
urb	A2012017	MOD13Q1	250m_16_days_NDVI	0.1006	0.2989	0.2996	0.3022	-0.1985	0.706	0.9045	1819.18	0.0101	6078	6072	99.9
urb	A2012033	MOD13Q1	250m_16_days_NDVI	0.1118	0.3208	0.3397	0.3403	-0.1908	0.7851	0.9759	2057.85	0.0125	6078	6058	99.67
urb	A2012049	MOD13Q1	250m_16_days_NDVI	0.118	0.4068	0.3573	0.3578	-0.1942	0.8484	1.0426	2156.56	0.0139	6078	6036	99.31
urb	A2012065	MOD13Q1	250m_16_days_NDVI	0.1167	0.318	0.3626	0.3616	-0.198	0.8459	1.0439	2160.64	0.0136	6078	5958	98.03
urb	A2012081	MOD13Q1	250m_16_days_NDVI	0.14	0.3929	0.4213	0.4209	-0.1905	0.9052	1.0957	2544.45	0.0196	6078	6040	99.37
urb	A2012097	MOD13Q1	250m_16_days_NDVI	0.1465	0.3588	0.42	0.412	-0.1927	0.9065	1.0992	2507.3	0.0214	6078	5970	98.22
urb	A2012113	MOD13Q1	250m_16_days_NDVI	0.137	0.3566	0.4013	0.3954	-0.1974	0.8931	1.0905	2430.08	0.0188	6078	6056	99.64
urb	A2012129	MOD13Q1	250m_16_days_NDVI	0.1231	0.4359	0.3859	0.3825	-0.1968	0.8657	1.0625	2331.45	0.0151	6078	6042	99.41
urb	A2012145	MOD13Q1	250m_16_days_NDVI	0.1145	0.3704	0.3574	0.3534	-0.1793	0.8518	1.0311	2164.66	0.0131	6078	6057	99.65
urb	A2012161	MOD13Q1	250m_16_days_NDVI	0.1141	0.3463	0.3472	0.3401	-0.1996	0.868	1.0676	2099.63	0.013	6078	6047	99.49
urb	A2012177	MOD13Q1	250m_16_days_NDVI	0.1195	0.3123	0.3515	0.3443	-0.1948	0.8982	1.093	2128.83	0.0143	6078	6057	99.65
urb	A2012193	MOD13Q1	250m_16_days_NDVI	0.1187	0.3862	0.3464	0.338	-0.1596	0.8683	1.0279	2105.43	0.0141	6078	6078	100
urb	A2012209	MOD13Q1	250m_16_days_NDVI	0.1237	0.3234	0.3512	0.3428	-0.1944	0.8713	1.0657	2127.15	0.0153	6078	6056	99.64
urb	A2012225	MOD13Q1	250m_16_days_NDVI	0.1242	0.3478	0.3493	0.3407	-0.1902	0.8658	1.056	2122.43	0.0154	6078	6077	99.98
urb	A2012241	MOD13Q1	250m_16_days_NDVI	0.12	0.3216	0.3461	0.339	-0.1916	0.8744	1.066	2103.09	0.0144	6078	6076	99.97
urb	A2012257	MOD13Q1	250m_16_days_NDVI	0.1211	0.3295	0.3426	0.3348	-0.1894	0.8963	1.0857	2078.41	0.0147	6078	6067	99.82
urb	A2012273	MOD13Q1	250m_16_days_NDVI	0.1178	0.3047	0.3439	0.3367	-0.1559	0.8922	1.0481	2087.99	0.0139	6078	6072	99.9
urb	A2012289	MOD13Q1	250m_16_days_NDVI	0.1212	0.3547	0.356	0.3537	-0.1649	0.8845	1.0494	2163.61	0.0147	6078	6078	100
urb	A2012305	MOD13Q1	250m_16_days_NDVI	0.1219	0.4603	0.374	0.3759	-0.188	0.8891	1.0771	2273.36	0.0149	6078	6078	100
urb	A2012321	MOD13Q1	250m_16_days_NDVI	0.1233	0.3459	0.3832	0.388	-0.1813	0.8689	1.0502	2281	0.0152	6078	5952	97.93
urb	A2012337	MOD13Q1	250m_16_days_NDVI	0.1353	0.3762	0.3981	0.4045	-0.1896	0.8419	1.0315	2415.08	0.0183	6078	6067	99.82
urb	A2012353	MOD13Q1	250m_16_days_NDVI	0.1436	0.3637	0.4153	0.426	-0.1958	0.8461	1.0419	2495.65	0.0206	6078	6009	98.86
urb	A2013001	MOD13Q1	250m_16_days_NDVI	0.1362	0.377	0.4041	0.405	-0.1702	0.8204	0.9906	2437.64	0.0185	6078	6032	99.24
urb	A2013017	MOD13Q1	250m_16_days_NDVI	0.14	0.4054	0.4112	0.4088	-0.188	0.8881	1.0761	2498.72	0.0196	6078	6077	99.98
urb	A2013033	MOD13Q1	250m_16_days_NDVI	0.1386	0.3267	0.4182	0.4081	-0.1875	0.8976	1.0851	2485.18	0.0192	6078	5943	97.78
urb	A2013049	MOD13Q1	250m_16_days_NDVI	0.1494	0.3361	0.4196	0.4076	-0.1984	0.9119	1.1103	2516.9	0.0223	6078	5999	98.7
urb	A2013065	MOD13Q1	250m_16_days_NDVI	0.1534	0.4316	0.4326	0.4169	-0.1953	0.9054	1.1007	2567.66	0.0235	6078	5935	97.65
urb	A2013081	MOD13Q1	250m_16_days_NDVI	0.1433	0.3865	0.4169	0.4036	-0.1523	0.923	1.0753	2503.64	0.0205	6078	6005	98.8
urb	A2013097	MOD13Q1	250m_16_days_NDVI	0.143	0.4007	0.4298	0.4227	-0.1981	0.9132	1.1113	2597.59	0.0205	6078	6044	99.44
urb	A2013113	MOD13Q1	250m_16_days_NDVI	0.1154	0.4075	0.3781	0.3756	-0.1943	0.8373	1.0316	2282.47	0.0133	6078	6036	99.31
urb	A2013129	MOD13Q1	250m_16_days_NDVI	0.1126	0.3408	0.3586	0.3554	-0.1996	0.8695	1.0691	2137.54	0.0127	6078	5960	98.06
urb	A2013145	MOD13Q1	250m_16_days_NDVI	0.1062	0.3529	0.3507	0.3456	-0.1886	0.8543	1.0429	2087.66	0.0113	6078	5953	97.94
urb	A2013161	MOD13Q1	250m_16_days_NDVI	0.1123	0.3586	0.3382	0.3308	-0.1684	0.8736	1.042	2041.66	0.0126	6078	6037	99.33
urb	A2013177	MOD13Q1	250m_16_days_NDVI	0.1145	0.2769	0.3412	0.3338	-0.1851	0.8737	1.0588	2073.85	0.0131	6078	6078	100
urb	A2013193	MOD13Q1	250m_16_days_NDVI	0.1189	0.3329	0.3404	0.3309	-0.1789	0.891	1.0699	2065.84	0.0141	6078	6069	99.85
urb	A2013241	MOD13Q1	250m_16_days_NDVI	0.1177	0.2771	0.336	0.3303	-0.189	0.8946	1.0836	2041.15	0.0139	6078	6075	99.95
urb	A2013257	MOD13Q1	250m_16_days_NDVI	0.1201	0.3333	0.3464	0.3418	-0.1844	0.8849	1.0693	2102.87	0.0144	6078	6071	99.88
urb	A2013273	MOD13Q1	250m_16_days_NDVI	0.1135	0.3397	0.3393	0.336	-0.1943	0.9066	1.1009	2061.91	0.0129	6078	6077	99.98
urb	A2013289	MOD13Q1	250m_16_days_NDVI	0.1117	0.3245	0.3307	0.3295	-0.1898	0.8012	0.991	1966.28	0.0125	6078	5945	97.81
urb	A2013305	MOD13Q1	250m_16_days_NDVI	0.1091	0.3093	0.3177	0.3157	-0.1804	0.8669	1.0473	1917.68	0.0119	6078	6036	99.31
urb	A2013321	MOD13Q1	250m_16_days_NDVI	0.1048	0.349	0.3095	0.3097	-0.1929	0.8238	1.0167	1865.52	0.011	6078	6027	99.16
urb	A2013337	MOD13Q1	250m_16_days_NDVI	0.1036	0.3333	0.3279	0.3278	-0.1993	0.8332	1.0325	1988.79	0.0107	6078	6066	99.8
urb	A2013353	MOD13Q1	250m_16_days_NDVI	0.0947	0.3333	0.3082	0.3081	-0.1979	0.7232	0.9211	1859.6	0.009	6078	6033	99.26
urb	A2014001	MOD13Q1	250m_16_days_NDVI	0.0934	0.2751	0.3055	0.3081	-0.1957	0.71	0.9057	1855.81	0.0087	6078	6074	99.93
urb	A2014017	MOD13Q1	250m_16_days_NDVI	0.0901	0.3333	0.2931	0.2942	-0.1963	0.7817	0.978	1774.79	0.0081	6078	6056	99.64
urb	A2014033	MOD13Q1	250m_16_days_NDVI	0.0976	0.312	0.3059	0.3077	-0.1962	0.9198	1.116	1854.19	0.0095	6078	6062	99.74
